# Supplementary material for: Iron(ii) complexes of 2,6-bis(imidazo[1,2-a]pyridin-2-yl)pyridine and related ligands with annelated distal heterocyclic donors
Source: Royal Society of Chemistry journal article supplement (doi:10.1039/d3dt02747c), 2023-01-01
Supplement: d3dt02747c1.pdf [file d3dt02747c1.pdf]

# **Iron(II) Complexes of 2,6-*Bis*(imidazo[1,2-*a*]pyridin-2-yl)pyridine and Related Ligands with Annelated Distal Heterocyclic Donors**

Rafal Kulmaczewski and Malcolm A. Halcrow<sup>\*,a</sup>

*<sup>a</sup>School of Chemistry, University of Leeds, Woodhouse Lane, Leeds LS2 9JT,  
United Kingdom.  
E-mail: m.a.halcrow@leeds.ac.uk*

## **Supporting Information**

|                                                                                                                                                                                                    | Page |
|----------------------------------------------------------------------------------------------------------------------------------------------------------------------------------------------------|------|
| <b>Experimental details</b>                                                                                                                                                                        | S4   |
| <b>Scheme S1</b> Synthesis of the new ligands L <sup>2</sup> and L <sup>3</sup> .                                                                                                                  | S4   |
| <b>Figure S1</b> <sup>1</sup> H and <sup>13</sup> C NMR spectra of L <sup>1</sup> .                                                                                                                | S5   |
| <b>Figure S2</b> <sup>1</sup> H NMR spectrum of L <sup>2</sup> .                                                                                                                                   | S6   |
| <b>Figure S3</b> <sup>1</sup> H and <sup>13</sup> C NMR spectra of L <sup>3</sup> .                                                                                                                | S7   |
| <b>Figure S4</b> <sup>1</sup> H and <sup>13</sup> C NMR spectra of L <sup>4</sup> .                                                                                                                | S8   |
| <b>Crystallographic procedures and refinement details</b>                                                                                                                                          | S9   |
| <b>Table S1</b> Experimental data for the crystal structure determinations.                                                                                                                        | S11  |
| <b>Definitions of the structural parameters discussed in the paper</b>                                                                                                                             | S13  |
| <b>Scheme S2</b> Angles used in the definitions of the coordination distortion parameters $\Sigma$ and $\Theta$ .                                                                                  | S13  |
| <b>Scheme S3</b> The parameters $\theta$ and $\phi$ , used to discuss the structures of <b>1-4</b> .                                                                                               | S13  |
| <b>Figure S5</b> The asymmetric unit of <b>1</b> [BF <sub>4</sub> ] <sub>2</sub> ·MeCN.                                                                                                            | S14  |
| <b>Figure S6</b> The asymmetric unit of <b>1</b> [BF <sub>4</sub> ] <sub>2</sub> · <i>m</i> MeNO <sub>2</sub> .                                                                                    | S15  |
| <b>Figure S7</b> The asymmetric unit of <b>1</b> [BF <sub>4</sub> ] <sub>1.6</sub> [SiF <sub>6</sub> ] <sub>0.2</sub> ·1.7MeNO <sub>2</sub> ·0.3Et <sub>2</sub> O.                                 | S16  |
| <b>Figure S8</b> The asymmetric unit of <b>1</b> [BF <sub>4</sub> ] <sub>2</sub> ·1.5MeOH.                                                                                                         | S17  |
| <b>Table S2</b> Selected bond lengths and angles in the solvate crystals of <b>1</b> [BF <sub>4</sub> ] <sub>2</sub>                                                                               | S18  |
| <b>Figure S9</b> Packing diagram of <b>1</b> [BF <sub>4</sub> ] <sub>2</sub> ·MeCN.                                                                                                                | S19  |
| <b>Figure S10</b> Space-filling plot of the intermolecular C–H··· $\pi$ contact which is proposed to inhibit SCO in solvates of <b>1</b> [BF <sub>4</sub> ] <sub>2</sub> .                         | S20  |
| <b>Figure S11</b> A “terpyridine embrace” layer in the lattice of <b>1</b> [BF <sub>4</sub> ] <sub>1.6</sub> [SiF <sub>6</sub> ] <sub>0.2</sub> ·1.7MeNO <sub>2</sub> ·0.3Et <sub>2</sub> O.       | S21  |
| <b>Table S3</b> Intermolecular interactions in the crystal structure of <b>1</b> [BF <sub>4</sub> ] <sub>1.6</sub> [SiF <sub>6</sub> ] <sub>0.2</sub> ·1.7MeNO <sub>2</sub> ·0.3Et <sub>2</sub> O. | S22  |
| <b>Figure S12</b> Packing diagram of <b>1</b> [BF <sub>4</sub> ] <sub>1.6</sub> [SiF <sub>6</sub> ] <sub>0.2</sub> ·1.7MeNO <sub>2</sub> ·0.3Et <sub>2</sub> O.                                    | S23  |
| <b>Figure S13</b> Alternative packing diagram of <b>1</b> [BF <sub>4</sub> ] <sub>1.6</sub> [SiF <sub>6</sub> ] <sub>0.2</sub> ·1.7MeNO <sub>2</sub> ·0.3Et <sub>2</sub> O.                        | S24  |
| <b>Figure S14</b> Packing diagram of <b>1</b> [BF <sub>4</sub> ] <sub>2</sub> ·1.5MeOH.                                                                                                            | S25  |
| <b>Figure S15</b> X-ray powder diffraction data from the solvate materials of <b>1</b> [BF <sub>4</sub> ] <sub>2</sub> .                                                                           | S26  |
| <b>Figure S16</b> Magnetic susceptibility data from the solvate materials of <b>1</b> [BF <sub>4</sub> ] <sub>2</sub> .                                                                            | S27  |
| <b>Figure S17</b> The asymmetric unit of <b>2</b> [BF <sub>4</sub> ] <sub>2</sub> ·1.5MeCN.                                                                                                        | S28  |
| <b>Figure S18</b> The asymmetric unit of <b>2</b> [BF <sub>4</sub> ] <sub>2</sub> ·Me <sub>2</sub> CO.                                                                                             | S29  |
| <b>Figure S19</b> The asymmetric unit of <b>2</b> [BF <sub>4</sub> ] <sub>2</sub> ·3.5MeNO <sub>2</sub> ·0.5Et <sub>2</sub> O.                                                                     | S30  |
| <b>Table S4</b> Selected bond lengths and angles in the solvate crystals of <b>2</b> [BF <sub>4</sub> ] <sub>2</sub>                                                                               | S31  |
| <b>Figure S20</b> Intermolecular contacts in the lattice of <b>2</b> [BF <sub>4</sub> ] <sub>2</sub> ·1.5MeCN.                                                                                     | S32  |
| <b>Figure S21</b> Intermolecular contacts in the lattice of <b>2</b> [BF <sub>4</sub> ] <sub>2</sub> ·3.5MeNO <sub>2</sub> ·0.5Et <sub>2</sub> O.                                                  | S33  |
| <b>Table S5</b> Intermolecular interactions in the solvate crystals of <b>2</b> [BF <sub>4</sub> ] <sub>2</sub> .                                                                                  | S34  |
| <b>Figure S22</b> Packing diagram of <b>2</b> [BF <sub>4</sub> ] <sub>2</sub> ·1.5MeCN.                                                                                                            | S35  |
| <b>Figure S23</b> Packing diagram of <b>2</b> [BF <sub>4</sub> ] <sub>2</sub> ·3.5MeNO <sub>2</sub> ·0.5Et <sub>2</sub> O.                                                                         | S36  |
| <b>Figure S24</b> X-ray powder diffraction data from the solvate materials of <b>2</b> [BF <sub>4</sub> ] <sub>2</sub> .                                                                           | S37  |
|                                                                                                                                                                                                    | Page |

|                                                                                   |                                                                                                                                                                    |      |
|-----------------------------------------------------------------------------------|--------------------------------------------------------------------------------------------------------------------------------------------------------------------|------|
| <b>Figure S25</b>                                                                 | Magnetic susceptibility data from the solvate materials of <b>2</b> [BF <sub>4</sub> ] <sub>2</sub> .                                                              | S38  |
| <b>Figure S26</b>                                                                 | The asymmetric unit of [FeBr(py) <sub>2</sub> (L <sup>3</sup> )]Br·0.5H <sub>2</sub> O.                                                                            | S39  |
| <b>Table S6</b>                                                                   | Selected bond lengths and angles in [FeBr(py) <sub>2</sub> (L <sup>3</sup> )]Br·0.5H <sub>2</sub> O.                                                               | S40  |
| <b>Figure S27</b>                                                                 | Packing diagram of [FeBr(py) <sub>2</sub> (L <sup>3</sup> )]Br·0.5H <sub>2</sub> O.                                                                                | S40  |
| <b>Figure S28</b>                                                                 | Molecule D in the refinement of <b>4</b> [BF <sub>4</sub> ] <sub>2</sub> ·1.39MeCN·0.125Et <sub>2</sub> O·0.25H <sub>2</sub> O.                                    | S41  |
| <b>Figure S29</b>                                                                 | The asymmetric unit of <b>4</b> [BF <sub>4</sub> ] <sub>2</sub> ·1.39MeCN·0.125Et <sub>2</sub> O·0.25H <sub>2</sub> O.                                             | S42  |
| <b>Table S7</b>                                                                   | Selected bond lengths and angles in <b>4</b> [BF <sub>4</sub> ] <sub>2</sub> ·1.39MeCN·0.125Et <sub>2</sub> O·0.25H <sub>2</sub> O.                                | S43  |
| <b>Figure S30</b>                                                                 | The four unique complex molecules in <b>4</b> [BF <sub>4</sub> ] <sub>2</sub> ·1.39MeCN·0.125Et <sub>2</sub> O·0.25H <sub>2</sub> O.                               | S44  |
| <b>Figure S31</b>                                                                 | Space-filling views of the molecules in <b>4</b> [BF <sub>4</sub> ] <sub>2</sub> ·1.39MeCN·0.125Et <sub>2</sub> O·0.25H <sub>2</sub> O.                            | S45  |
| <b>Figure S32</b>                                                                 | Alternative space-filling views of the molecules in <b>4</b> [BF <sub>4</sub> ] <sub>2</sub> ·1.39MeCN·0.125Et <sub>2</sub> O·0.25H <sub>2</sub> O.                | S46  |
| <b>Table S8</b>                                                                   | Intramolecular contacts in <b>4</b> [BF <sub>4</sub> ] <sub>2</sub> ·1.39MeCN·0.125Et <sub>2</sub> O·0.25H <sub>2</sub> O.                                         | S47  |
| <b>Figure S33</b>                                                                 | Packing diagram of <b>4</b> [BF <sub>4</sub> ] <sub>2</sub> ·1.39MeCN·0.125Et <sub>2</sub> O·0.25H <sub>2</sub> O.                                                 | S48  |
| <b>Figure S34</b>                                                                 | Alternative packing diagram of <b>4</b> [BF <sub>4</sub> ] <sub>2</sub> ·1.39MeCN·0.125Et <sub>2</sub> O·0.25H <sub>2</sub> O.                                     | S49  |
| <b>Figure S35</b>                                                                 | A helical cation stack in the lattice of <b>4</b> [BF <sub>4</sub> ] <sub>2</sub> ·1.39MeCN·0.125Et <sub>2</sub> O·0.25H <sub>2</sub> O.                           | S50  |
| <b>Table S9</b>                                                                   | Intermolecular contacts in <b>4</b> [BF <sub>4</sub> ] <sub>2</sub> ·1.39MeCN·0.125Et <sub>2</sub> O·0.25H <sub>2</sub> O.                                         | S51  |
| <b>Figure S36</b>                                                                 | Variable temperature magnetic susceptibility data for <b>4</b> [BF <sub>4</sub> ] <sub>2</sub> .                                                                   | S51  |
| <b>Figure S37</b>                                                                 | <sup>1</sup> H NMR spectra of <b>1</b> [BF <sub>4</sub> ] <sub>2</sub> and <b>2</b> [BF <sub>4</sub> ] <sub>2</sub> .                                              | S52  |
| <b>Figure S38</b>                                                                 | <sup>1</sup> H NMR spectrum of a mixture of Fe[B(F <sub>4</sub> ) <sub>2</sub> ] <sub>2</sub> ·6H <sub>2</sub> O and 2 equiv L <sup>3</sup> in CD <sub>3</sub> CN. | S53  |
| <b>Figure S39</b>                                                                 | <sup>1</sup> H NMR spectrum of <b>4</b> [BF <sub>4</sub> ] <sub>2</sub> .                                                                                          | S54  |
| <b>Table S10</b>                                                                  | UV-vis absorption and emission spectrum data for the compounds in this work.                                                                                       | S54  |
| <b>Figure S40</b>                                                                 | Energy-minimised structures for the organic ligands.                                                                                                               | S55  |
| <b>Figure S41</b>                                                                 | Frontier orbital plots for L <sup>1</sup> .                                                                                                                        | S56  |
| <b>Figure S42</b>                                                                 | Frontier orbital energies for the <i>bis</i> (azoly)pyridine ligands computed in this work.                                                                        | S57  |
| <b>Table S11</b>                                                                  | Computed energies of the organic ligands, and their N-donor lone pair MOs.                                                                                         | S58  |
| <b>Discussion of the free ligand DFT calculations.</b>                            |                                                                                                                                                                    | S58  |
| <b>Figure S43</b>                                                                 | Energy-minimised structures of [FeL <sub>2</sub> ] <sup>2+</sup> (L = L <sup>1</sup> -L <sup>4</sup> ).                                                            | S59  |
| <b>Table S12</b>                                                                  | Computed metric parameters for the complexes in this work.                                                                                                         | S61  |
| <b>Figure S43</b>                                                                 | Frontier orbital plots for <b>1</b> <sup>2+</sup> .                                                                                                                | S63  |
| <b>Figure S45</b>                                                                 | Frontier molecular orbital energies of low-spin complexes in this work.                                                                                            | S64  |
| <b>Figure S46</b>                                                                 | Comparison of the MO energies of <b>1</b> <sup>2+</sup> , [Fe(bimpy) <sub>2</sub> ] <sup>2+</sup> and [Fe(2-bip) <sub>2</sub> ] <sup>2+</sup> .                    | S65  |
| <b>Discussion of the frontier orbitals in the complexes (Figures S45 and S46)</b> |                                                                                                                                                                    | S66  |
| <b>Figure S47</b>                                                                 | Comparison of the computed and experimental high-spin geometries of [Fe(L <sup>4</sup> ) <sub>2</sub> ] <sup>2+</sup> .                                            | S66  |
| <b>Figure S48</b>                                                                 | Energy-minimised structures of the distorted coordination geometries of high-spin <b>1</b> <sup>2+</sup> and <b>2</b> <sup>2+</sup> .                              | S67  |
| <b>Table S13</b>                                                                  | Computed metric parameters for the distorted coordination geometries of <b>1</b> <sup>2+</sup> and <b>2</b> <sup>2+</sup> .                                        | S68  |
| <b>Table S14</b>                                                                  | Atomic coordinates for the DFT-minimised molecules.                                                                                                                | S69  |
| <b>References</b>                                                                 |                                                                                                                                                                    | S100 |

## Experimental

2,6-Bis(imidazo[1,2-a]pyrimidin-2-yl)pyridine ( $L^1$ )<sup>1</sup> and 2,6-di(quinolin-2-yl)pyridine ( $L^4$ )<sup>2</sup> were synthesised by the literature procedures.  $\alpha,\alpha'$ -Dibromo-2,6-diacetylpyridine was freshly prepared from 2,6-diacetylpyridine as described in ref. 1, and used immediately to make  $L^2$  and  $L^3$ . Other reagents were purchased commercially and used as supplied.

Synthetic protocols and characterisation data for the iron complexes are given in the Experimental section of the main article.

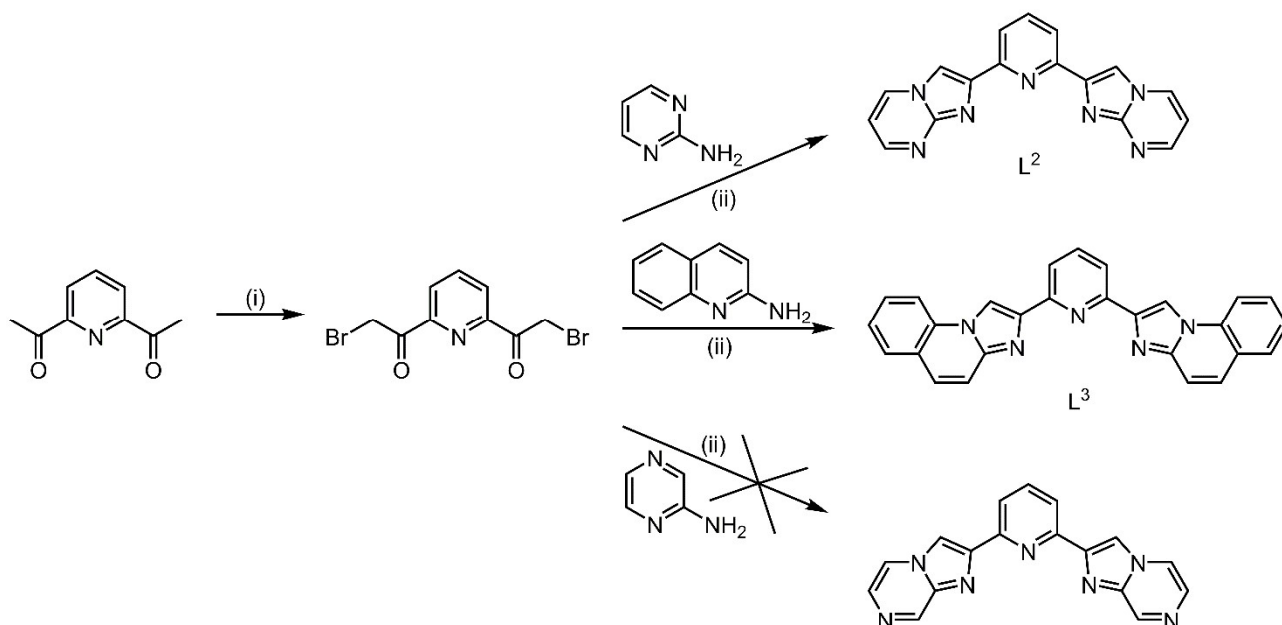

**Scheme S1** Synthesis of the new ligands  $L^2$  and  $L^3$ . The bottom reaction using aminopyrazine was also attempted, but the product was too insoluble for NMR or ES-MS characterisation or for use in complexation reactions. Reagents and conditions: (i) *N*-bromosuccinimide, *p*-toluenesulfonic acid monohydrate, acetonitrile, reflux, 16 hrs.<sup>1</sup> (ii)  $\text{NaHCO}_3$ , acetonitrile, reflux, 16 hrs.

**Synthesis of 2,6-bis(imidazo[1,2-a]pyrimidin-2-yl)pyridine ( $L^2$ ).** A mixture of 2-aminopyrimidine (0.16 g, 1.6 mmol),  $\alpha,\alpha'$ -dibromo-2,6-diacetylpyridine (0.25 g, 0.78 mmol) and  $\text{NaHCO}_3$  (0.20 g, 2.4 mol) in MeCN (5 cm<sup>3</sup>) was heated under reflux for 16 hrs. The resultant orange-brown precipitate was cooled, then collected by filtration and washed with MeCN and water. The product is very sparingly soluble, and was analysed without further purification. Yield 0.17 g, 68 %. ES-MS  $m/z$  157.5610 (calcd  $[\text{H}_2(\text{L}^2)]^{2+}$  157.5611), 314.1150 (calcd  $[\text{H}(\text{L}^2)]^+$  314.1149), 336.0968 (calcd  $[\text{Na}(\text{L}^2)]^+$  336.0968). <sup>1</sup>H NMR ( $\{\text{CD}_3\}_2\text{SO}$ )  $\delta$  7.13 (dd, 4.1 and 6.7 Hz, 2H), 8.05 (roofed m, 1H), 8.13 (roofed d, 7.1 Hz, 2H), 8.58 (s, 2H), 8.61 (dd, 2.0 and 4.1 Hz, 2H), 9.07 (dd, 2.0 and 6.7 Hz, 2H).  $L^2$  was too insoluble to afford a <sup>13</sup>C NMR spectrum.

**Synthesis of 2,6-bis(imidazo[1,2-a]quinolin-2-yl)pyridine ( $L^3$ ).** Method as for  $L^2$ , using 2-aminoquinoline (0.24 g, 1.6 mmol). The product was a sparingly soluble brown solid. Yield 0.25 g, 78 %. ES-MS  $m/z$  206.5874 (calcd  $[\text{H}_2(\text{L}^3)]^{2+}$  206.5815), 412.1664 (calcd  $[\text{H}(\text{L}^3)]^+$  412.1557), 845.3067 (calcd  $[\text{Na}(\text{L}^3)_2]^+$  845.2866). <sup>1</sup>H NMR ( $\{\text{CD}_3\}_2\text{SO}$ )  $\delta$  7.62 (pseudo-t, 7.5 Hz, 2H), 7.67 (d, 9.4 Hz, 2H), 7.80 (d, 9.4 Hz, 2H), 7.83 (pseudo-t, 7.4 Hz, 2H), 7.98-8.06 (m, 5H), 8.55 (d, 8.4 Hz, 2H), 9.42 (s, 2H). <sup>13</sup>C NMR ( $\{\text{CD}_3\}_2\text{SO}$ )  $\delta$  111.9, 116.5, 117.4, 118.5, 123.5, 125.7, 127.2, 129.8 (2C), 132.9, 138.4, 143.9, 144.8, 152.8.

**Attempted synthesis of 2,6-bis(imidazo[1,2-a]pyrazin-2-yl)pyridine.** Method as for  $L^2$ , using aminopyrazine (0.16 g, 1.6 mmol). The reaction gave 0.10 g of brown precipitate (putative yield 41 %), which was too insoluble for NMR or ES-MS characterisation.

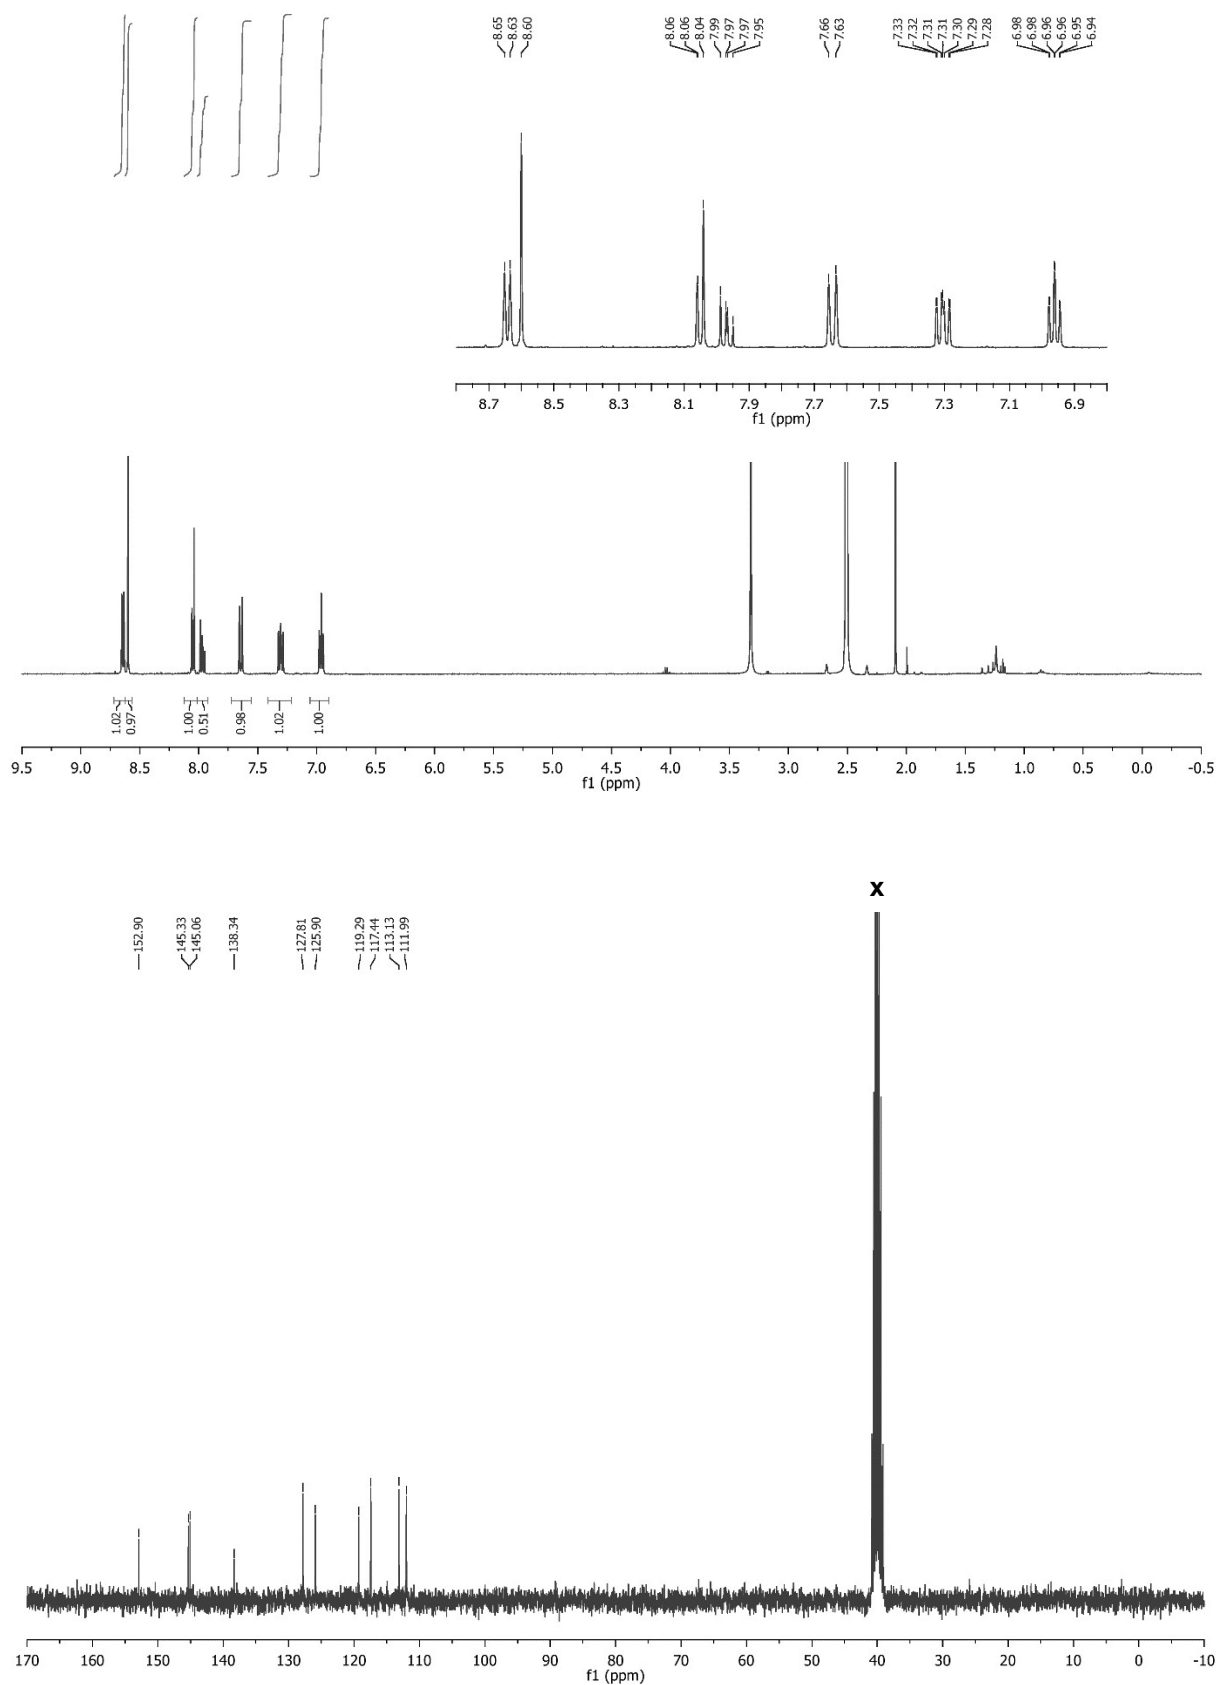

**Figure S1**  $^1\text{H}$  (top) and  $^{13}\text{C}$  (bottom) NMR spectra of L<sup>1</sup> ( $\text{CD}_3\text{SO}_2$ ).<sup>1</sup>

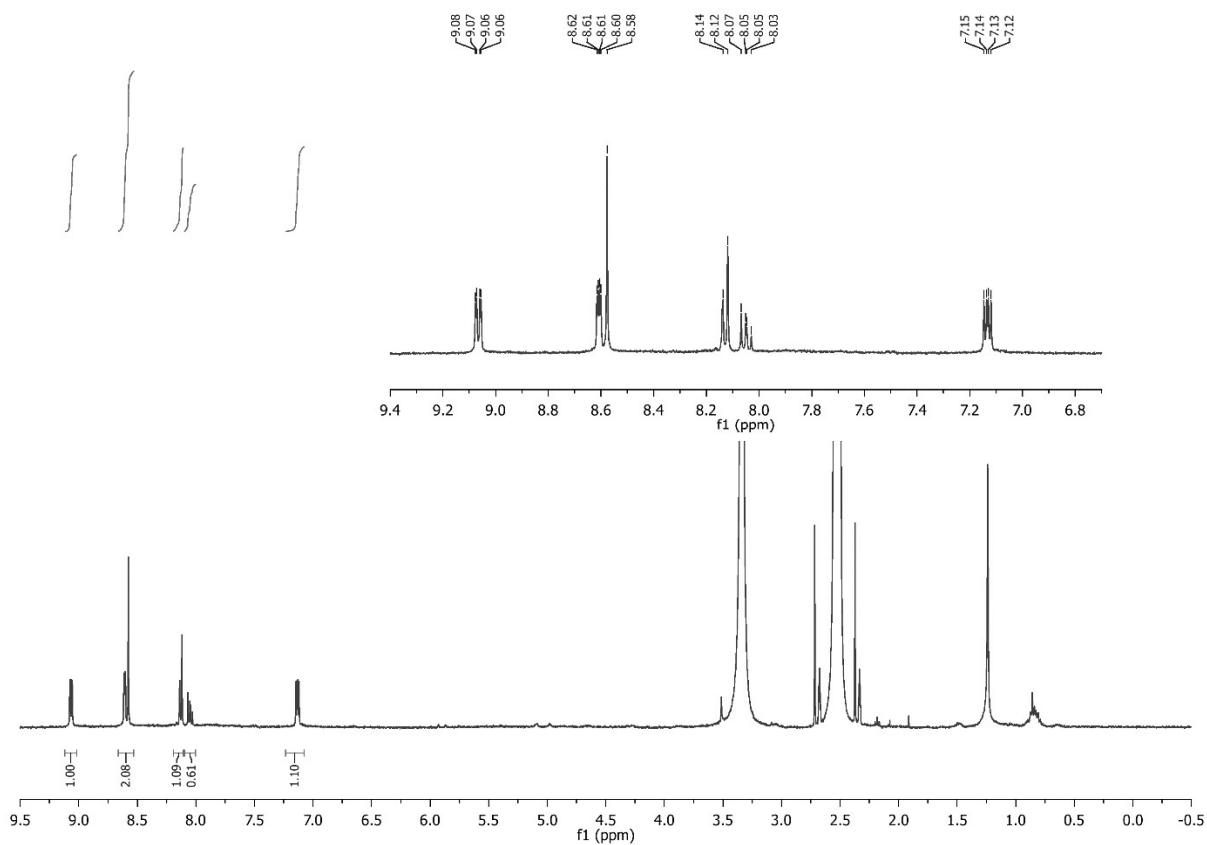

**Figure S2** <sup>1</sup>H NMR spectrum of L<sup>2</sup> ((CD<sub>3</sub>)<sub>2</sub>SO).

The compound was too insoluble to afford a <sup>13</sup>C spectrum.

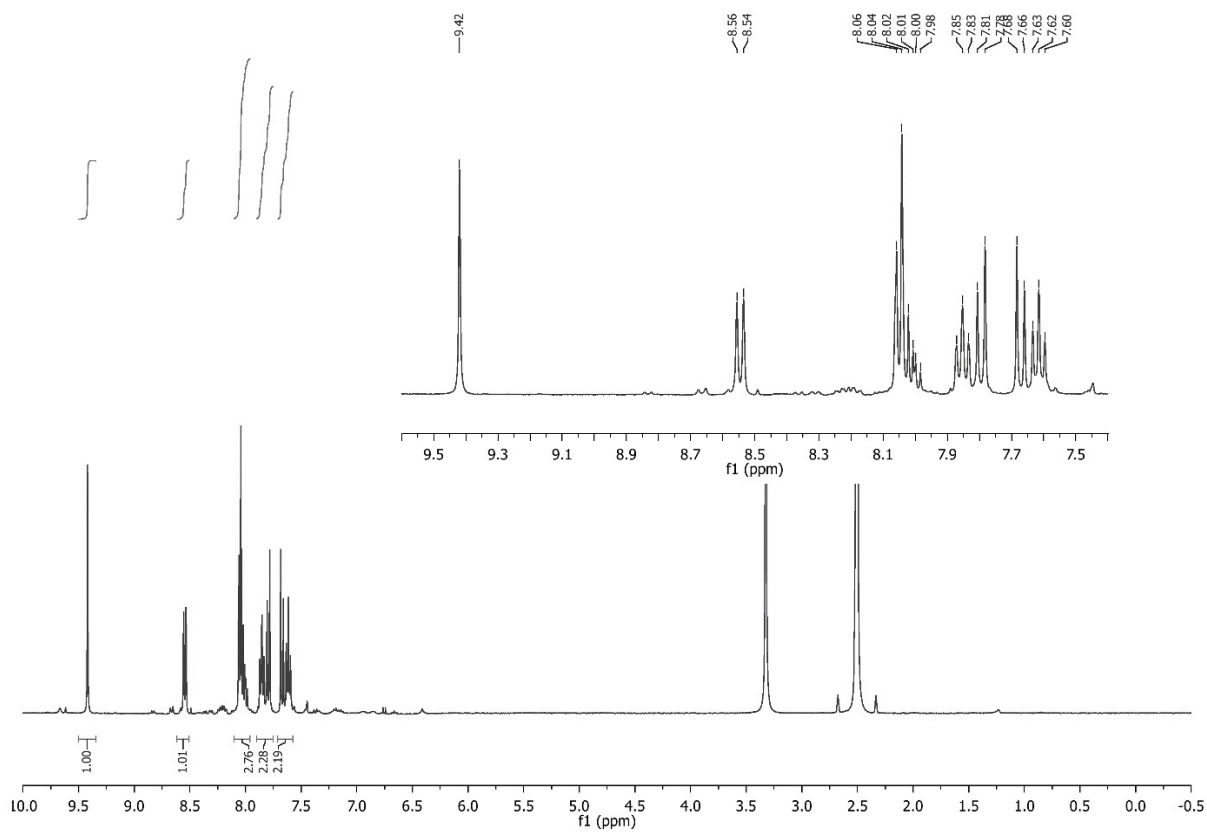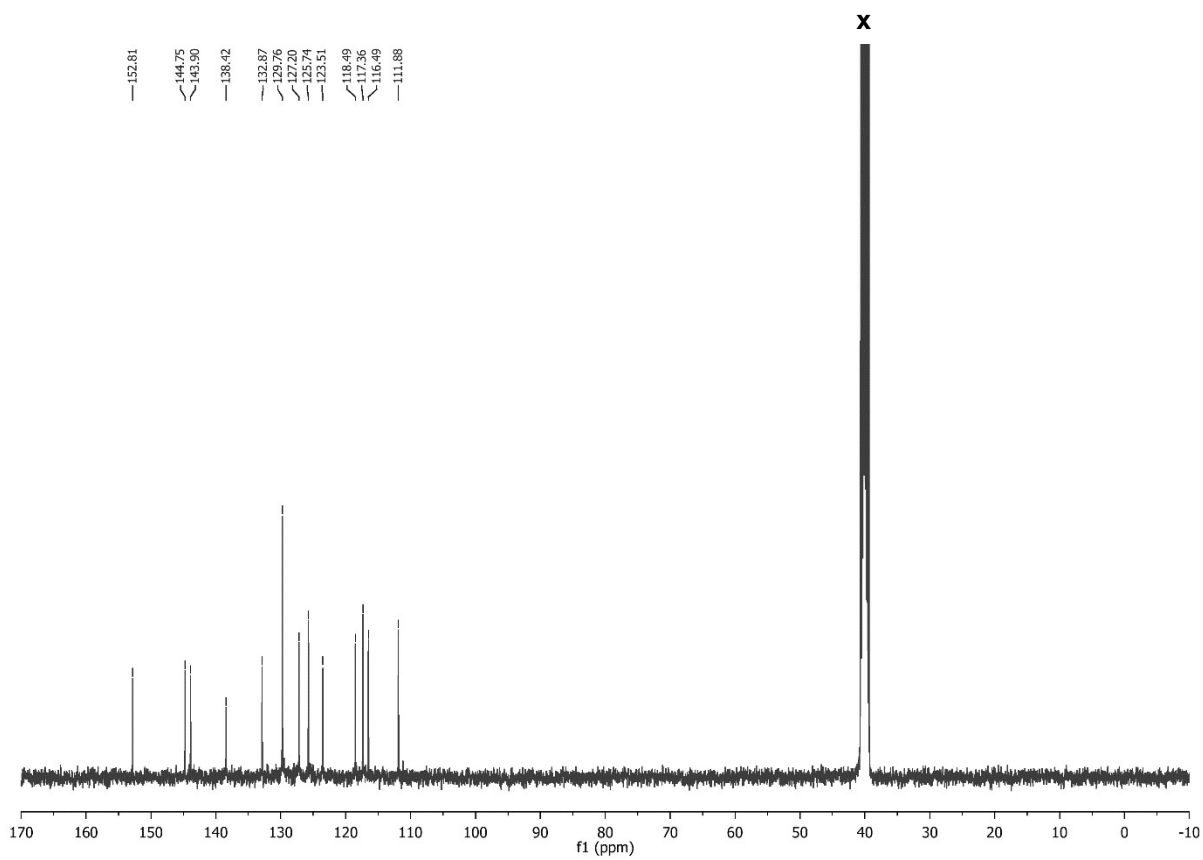

Figure S3  $^1\text{H}$  (top) and  $^{13}\text{C}$  (bottom) NMR spectra of  $\text{L}^3$  ( $\{\text{CD}_3\}_2\text{SO}$ ).

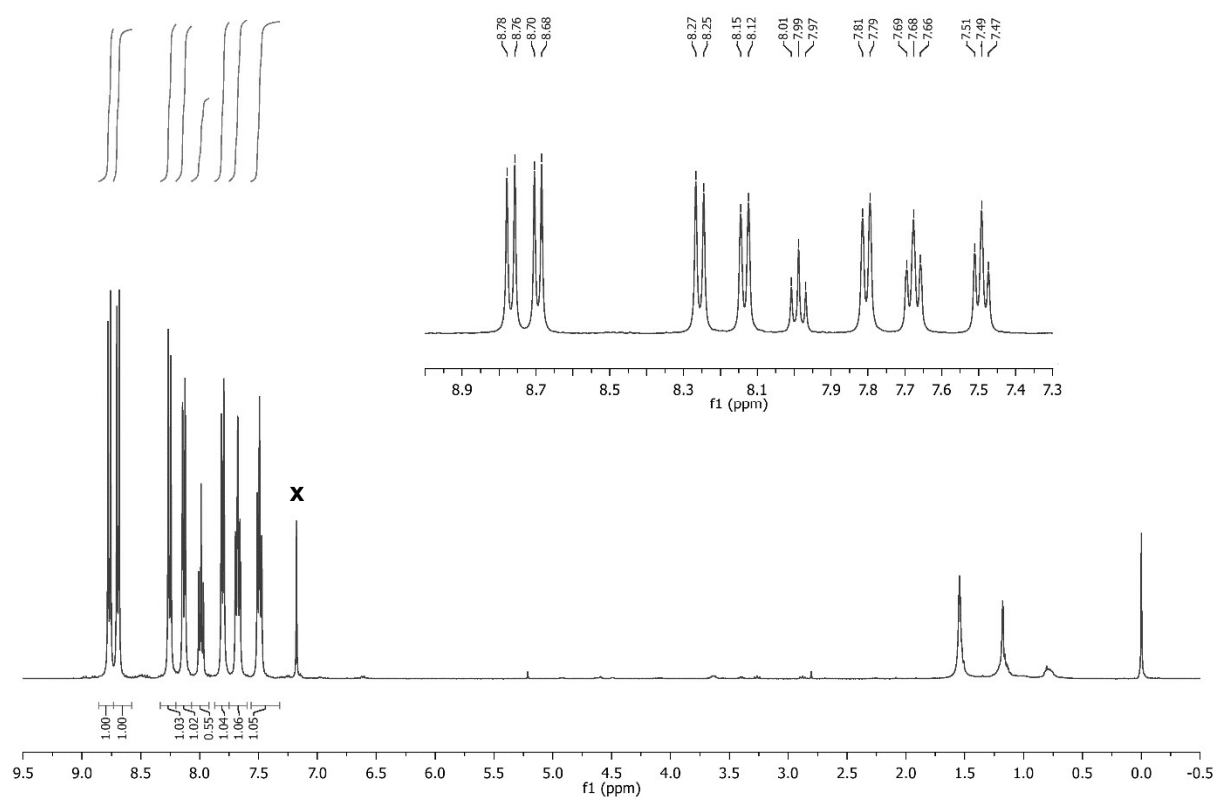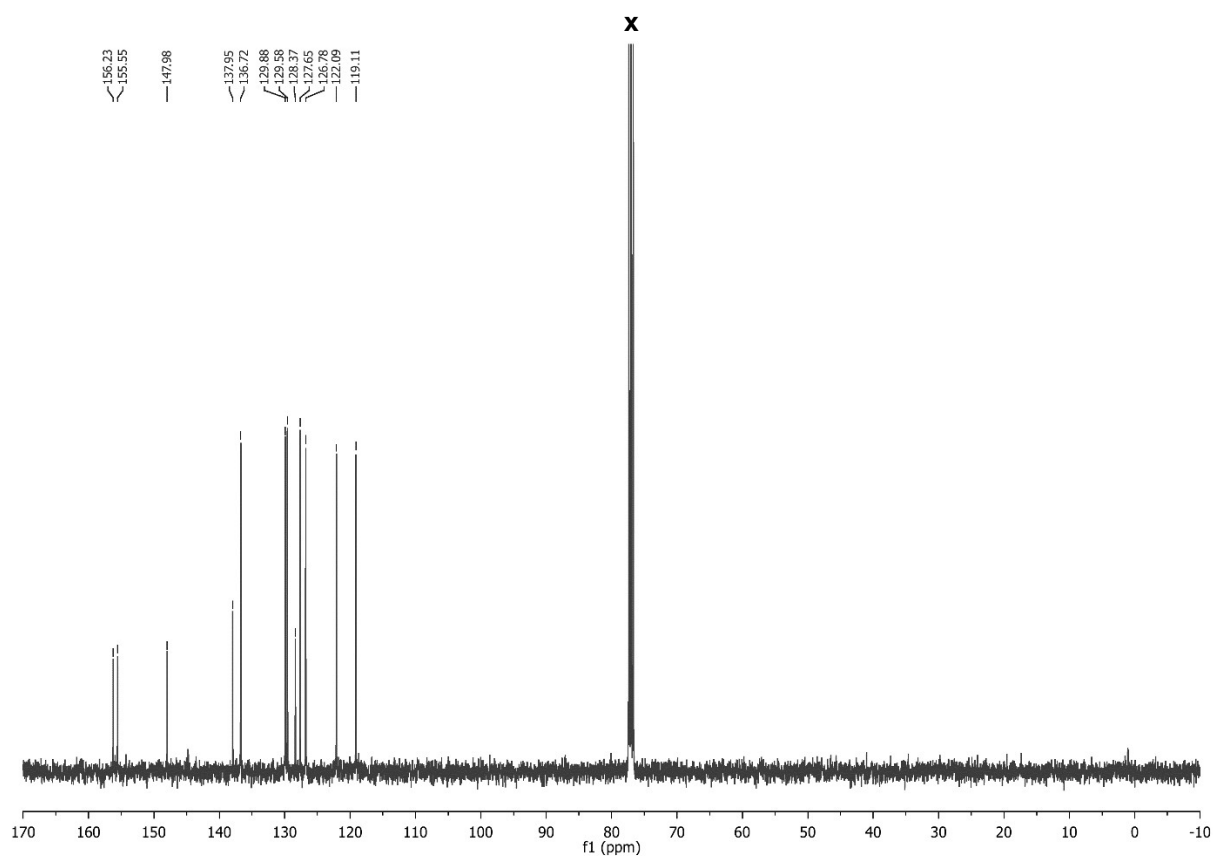

Figure S4  $^1\text{H}$  (top) and  $^{13}\text{C}$  (bottom) NMR spectra of  $\text{L}^4$  ( $\text{CDCl}_3$ ).<sup>2</sup>



## Single Crystal Structure Analyses

Experimental details of the structure determinations are given in Table S1. All the structures were solved by direct methods (*SHELX-TL*<sup>3</sup>), and developed by full least-squares refinement on  $F^2$  (*SHELXL2018*<sup>4</sup>). Crystallographic figures were produced using *XSEED*,<sup>5</sup> and other publication materials were prepared with *OLEX2*.<sup>6</sup>

Unless otherwise stated, all fully occupied non-H atoms in the following refinements were refined anisotropically, while H atoms were placed in calculated positions and refined using a riding model. Disordered anions were treated with refined B–F and F···F distance restraints, while disordered solvent residues were modelled using fixed distance restraints.

**Structure refinements of  $1[\text{BF}_4]_2 \cdot \text{MeCN}$  and  $[\text{Fe}(\text{L}^1)_2][\text{BF}_4]_2 \cdot m\text{MeNO}_2$ .** The asymmetric units of these isomorphous crystals contain half a formula unit. There is: half a complex cation, with Fe(1) lying on the  $C_2$  axis  $1/4, 3/4, z$ ; a disordered solvent site spanning the same  $C_2$  axis; and, two  $\text{BF}_4^-$  half-anions that also span  $C_2$  axes. The solvent was refined over two orientations, whose occupancies sum to 0.5 in the MeCN solvate or 0.4 in the MeNO<sub>2</sub> solvate; no additional, well-defined 0.1-occupied MeNO<sub>2</sub> environment was apparent in the Fourier map of the latter crystal. All the non-H atoms except the disordered solvent were refined anisotropically.

**Structure refinement of  $1[\text{BF}_4]_{1.6}[\text{SiF}_6]_{0.2} \cdot 1.7\text{MeNO}_2 \cdot 0.3\text{Et}_2\text{O}$ .** There is one formula unit in the asymmetric unit of this crystal with all residues on general crystallographic sites. One anion was badly disordered, with a central atom whose  $U_{\text{iso}}$  parameter was abnormally low when refined as a fully occupied B atom. To account for that, the anion was modelled as a mixture of  $\text{BF}_4^-$  [two orientations sharing a common B atom, total occupancy 0.60] and  $\text{SiF}_6^{2-}$  [one site, occupancy 0.20]. Fixed B–F, Si–F and F···F distance restraints were applied to the disordered anion residues. In addition to one ordered nitromethane molecule, a disordered region of solvent was modelled with two partial molecules of nitromethane (occupancies 0.55 and 0.15) and one molecule of diethyl ether (0.3). SIMU  $U_{\text{iso}}$  constraints were applied to each disordered residue in this model, in addition to the distance restraints listed above. All wholly occupied non-H atoms were refined anisotropically except the disordered B atom (which was persistently non-positive definite). There are two residual Fourier peaks of 1.2–1.6  $e \text{ \AA}^{-3}$ , which are both associated with the disordered solvent region.

**Structure refinement of  $1[\text{BF}_4]_2 \cdot 1.5\text{MeOH}$ .** This crystal is an apparently perfect racemic twin, in the space group  $Pna2_1$ . Allowing for their different space group settings, its orthorhombic unit cell dimensions are the same as for  $1[\text{BF}_4]_2 \cdot \text{MeCN}$  and  $1[\text{BF}_4]_2 \cdot m\text{MeNO}_2$ , which adopt the centrosymmetric space group  $Pccn$ . However, attempts to refine this structure using that model were unsuccessful. A PLATON analysis<sup>7</sup> of this refinement (in  $Pna2_1$ ) noted a non-crystallographic approximate inversion centre, but suggested this choice of space group was correct.

The asymmetric unit contains one complex cation and two  $\text{BF}_4^-$  anions, which are crystallographically ordered, and a disordered region of solvent that was modelled with four partial methanol environments whose occupancies sum to 1.5. The highest residual Fourier peak of +1.1  $e \text{ \AA}^{-3}$  is associated with one of the  $\text{BF}_4^-$  ions, and may indicate a small degree of unmodelled disorder in that residue.

**Structure refinements of  $2[\text{BF}_4]_2 \cdot 1.5\text{MeCN}$  and  $2[\text{BF}_4]_2 \cdot \text{Me}_2\text{CO}$ .** The asymmetric unit of  $2[\text{BF}_4]_2 \cdot 1.5\text{MeCN}$  contains one formula unit, including a half-molecule of acetonitrile that is disordered about the crystallographic inversion centre. Fixed distance restraints were applied to the solvent half-molecule to ensure a reasonable geometry. No other disorder is present in the model, and no other restraints were used during the refinement. All non-H atoms except the disordered solvent were refined anisotropically.

$2[\text{BF}_4]_2 \cdot \text{Me}_2\text{CO}$  is isomorphous with the acetonitrile solvate, but lacks the disordered solvent site near the crystallographic inversion centre. No disorder is present in that model, and no restraints were applied to the refinement.

**Structure refinement of  $2[\text{BF}_4]_2 \cdot 3.5\text{MeNO}_2 \cdot 0.5\text{Et}_2\text{O}$ .** Anion B(50)-F(54) is disordered over three sites, with occupancies of 0.40:0.40:0.20. Three of the four solvents sites in the model are also disordered, two of them with three partial nitromethane molecules (two of them sharing a common N atoms), and the other with half-occupied, overlying nitromethane and diethyl ether residues. The disordered solvent was modelled using fixed distance restraints.

**Structure refinement of  $[\text{FeBr}(\text{py})_2(\text{L}^3)]\text{Br} \cdot 0.5\text{H}_2\text{O}$ .** The asymmetric unit contains one complex cation, one bromide anion that is disordered over two equally occupied sites; and, another Fourier peak that is not bonded to any other atom, and was modelled as half an equivalent of water. All non-H atoms except the partial water O atom were refined anisotropically. The partial water H atoms were not located in the Fourier map, but are included in the molecular weight and density calculations.

The disordered bromide ion and water half-molecule occupy a cavity surrounding a crystallographic inversion centre. Although its H atoms were not located, the partial water site is positioned to hydrogen bond to Br(7B) and Br(7A<sup>i</sup>) [symmetry code: (i)  $-x, 1-y, 1-z$ ].

**Structure refinement of  $4[\text{BF}_4]_2 \cdot 1.39\text{MeCN} \cdot 0.125\text{Et}_2\text{O} \cdot 0.25\text{H}_2\text{O}$ .** The asymmetric unit of this crystal contains four formula units of the compound (*ie*  $Z' = 4$ ) with four complex dications, eight  $\text{BF}_4^-$  anions, six fully or part-occupied acetonitrile molecules, a disordered half-occupied diethyl ether molecule and two partial water sites whose occupancies sum to 1. All these residues are on general crystallographic sites apart from one acetonitrile half-molecule, that spans a crystallographic inversion centre.

Ligand N(28)-C(35) in cation B is disordered over two sites, whose occupancies refined to 0.61:0.39. The major disorder site was modelled without restraints, but the quinolyl groups of the minor disorder site were refined as rigid groups to ensure a sensible geometry. This ligand disorder may be connected to the occupancy of a neighbouring partial water site O(121), which is 1.92 Å from the major partial ligand atom H(53B).

Three of the  $\text{BF}_4^-$  ions are also disordered: one over two sites in a 0.70:0.30 ratio, that share a common F atom; and the other two over three equally occupied orientations where, in one case, two of the disorder sites have a common B atom. Two of the acetonitrile sites and the partial diethyl molecule were also disordered.

All fully occupied non-H atoms were refined anisotropically. The partial water H atoms were not located in the Fourier map and are not included in the model, but are accounted for in the molecular weight and density calculations.

CCDC 2288873-2288881 contain the supplementary crystallographic data for this paper (Table S1). These data can be obtained free of charge from The Cambridge Crystallographic Data Centre via [www.ccdc.cam.ac.uk/data\\_request/cif](http://www.ccdc.cam.ac.uk/data_request/cif).

**Table S1** Experimental data for the crystal structure determinations in this work.

|                                                                                             | <b>1[BF<sub>4</sub>]<sub>2</sub>·MeCN</b>                                       | <b>1[BF<sub>4</sub>]<sub>2</sub>·<i>m</i>MeNO<sub>2</sub><br/>(<i>m</i> ≈ 0.8)</b>                     | <b>1[BF<sub>4</sub>]<sub>1.6</sub>[SiF<sub>6</sub>]<sub>0.2</sub>·1.7MeNO<sub>2</sub>-<br/>·0.3Et<sub>2</sub>O</b>           | <b>1[BF<sub>4</sub>]<sub>2</sub>·1.5MeOH</b>                                                       | <b>2[BF<sub>4</sub>]<sub>2</sub>·1.5MeCN</b>                                        |
|---------------------------------------------------------------------------------------------|---------------------------------------------------------------------------------|--------------------------------------------------------------------------------------------------------|------------------------------------------------------------------------------------------------------------------------------|----------------------------------------------------------------------------------------------------|-------------------------------------------------------------------------------------|
| molecular formula                                                                           | C <sub>40</sub> H <sub>29</sub> B <sub>2</sub> F <sub>8</sub> FeN <sub>11</sub> | C <sub>38.8</sub> H <sub>28.4</sub> B <sub>2</sub> F <sub>8</sub> FeN <sub>10.8</sub> O <sub>1.6</sub> | C <sub>40.9</sub> H <sub>34.1</sub> B <sub>1.6</sub> F <sub>7.6</sub> FeN <sub>11.7</sub> O <sub>3.7</sub> Si <sub>0.2</sub> | C <sub>39.5</sub> H <sub>32</sub> B <sub>2</sub> F <sub>8</sub> FeN <sub>10</sub> O <sub>1.5</sub> | C <sub>37</sub> H <sub>26.5</sub> B <sub>2</sub> F <sub>8</sub> FeN <sub>15.5</sub> |
| <i>M<sub>r</sub></i>                                                                        | 893.21                                                                          | 900.99                                                                                                 | 971.86                                                                                                                       | 900.22                                                                                             | 917.71                                                                              |
| crystal class                                                                               | orthorhombic                                                                    | orthorhombic                                                                                           | triclinic                                                                                                                    | orthorhombic                                                                                       | triclinic                                                                           |
| space group                                                                                 | <i>Pccn</i>                                                                     | <i>Pccn</i>                                                                                            | <i>P</i> $\bar{1}$                                                                                                           | <i>Pna</i> 2 <sub>1</sub>                                                                          | <i>P</i> $\bar{1}$                                                                  |
| <i>a</i> / Å                                                                                | 12.4421(3)                                                                      | 12.3988(5)                                                                                             | 12.7520(4)                                                                                                                   | 25.2181(6)                                                                                         | 13.0255(5)                                                                          |
| <i>b</i> / Å                                                                                | 12.9696(3)                                                                      | 12.9182(4)                                                                                             | 13.6771(4)                                                                                                                   | 12.4550(2)                                                                                         | 13.5032(6)                                                                          |
| <i>c</i> / Å                                                                                | 25.2174(8)                                                                      | 25.2840(9)                                                                                             | 13.9688(4)                                                                                                                   | 12.9419(3)                                                                                         | 13.7441(6)                                                                          |
| $\alpha$ / °                                                                                | –                                                                               | –                                                                                                      | 79.861(2)                                                                                                                    | –                                                                                                  | 101.726(4)                                                                          |
| $\beta$ / °                                                                                 | –                                                                               | –                                                                                                      | 78.387(3)                                                                                                                    | –                                                                                                  | 102.485(3)                                                                          |
| $\gamma$ / °                                                                                | –                                                                               | –                                                                                                      | 64.173(3)                                                                                                                    | –                                                                                                  | 118.470(4)                                                                          |
| <i>V</i> / Å <sup>3</sup>                                                                   | 4069.31(19)                                                                     | 4049.7(3)                                                                                              | 2137.25(12)                                                                                                                  | 4064.94(15)                                                                                        | 1938.19(16)                                                                         |
| <i>Z</i>                                                                                    | 4                                                                               | 4                                                                                                      | 2                                                                                                                            | 4                                                                                                  | 2                                                                                   |
| $\mu$ / mm <sup>-1</sup>                                                                    | 3.694                                                                           | 3.746                                                                                                  | 3.677                                                                                                                        | 3.722                                                                                              | 3.931                                                                               |
| <i>D<sub>c</sub></i> / gcm <sup>-3</sup>                                                    | 1.458                                                                           | 1.478                                                                                                  | 1.510                                                                                                                        | 1.471                                                                                              | 1.572                                                                               |
| <i>T</i> / K                                                                                | 120                                                                             | 120                                                                                                    | 120                                                                                                                          | 120                                                                                                | 120                                                                                 |
| measured reflections                                                                        | 10690                                                                           | 10459                                                                                                  | 16955                                                                                                                        | 10785                                                                                              | 15897                                                                               |
| independent reflections                                                                     | 4029                                                                            | 3990                                                                                                   | 8110                                                                                                                         | 6058                                                                                               | 7308                                                                                |
| <i>R</i> <sub>int</sub>                                                                     | 0.050                                                                           | 0.050                                                                                                  | 0.056                                                                                                                        | 0.028                                                                                              | 0.041                                                                               |
| parameters                                                                                  | 316                                                                             | 318                                                                                                    | 640                                                                                                                          | 574                                                                                                | 569                                                                                 |
| restraints                                                                                  | 6                                                                               | 12                                                                                                     | 86                                                                                                                           | 5                                                                                                  | 23                                                                                  |
| <i>R</i> <sub>1</sub> [ <i>F</i> <sub>0</sub> > 4σ( <i>F</i> <sub>0</sub> )] <sup>[a]</sup> | 0.077                                                                           | 0.059                                                                                                  | 0.071                                                                                                                        | 0.050                                                                                              | 0.055                                                                               |
| <i>wR</i> <sub>2</sub> , all data <sup>[b]</sup>                                            | 0.228                                                                           | 0.183                                                                                                  | 0.200                                                                                                                        | 0.145                                                                                              | 0.154                                                                               |
| goodness of fit                                                                             | 1.076                                                                           | 1.054                                                                                                  | 1.102                                                                                                                        | 1.062                                                                                              | 1.064                                                                               |
| $\Delta\rho_{\min/\max}$ / eÅ <sup>-3</sup>                                                 | -0.45/0.90                                                                      | -0.47/0.76                                                                                             | -0.64/1.63                                                                                                                   | -0.45/1.11                                                                                         | -0.62/0.88                                                                          |
| Flack parameter                                                                             | –                                                                               | –                                                                                                      | –                                                                                                                            | 0.498(7)                                                                                           | –                                                                                   |
| CCDC                                                                                        | 2288873                                                                         | 2288874                                                                                                | 2288875                                                                                                                      | 2288876                                                                                            | 2288877                                                                             |

<sup>[a]</sup> $R = \sum [ |F_o| - |F_c| ] / \sum |F_o|$

<sup>[b]</sup> $wR = [\sum w(F_o^2 - F_c^2) / \sum wF_o^4]^{1/2}$

Table S1 continued

|                                                                                             | <b>2[BF<sub>4</sub>]<sub>2</sub>·Me<sub>2</sub>CO</b>                             | <b>2[BF<sub>4</sub>]<sub>2</sub>·3.5MeNO<sub>2</sub>-<br/>·0.5Et<sub>2</sub>O</b>                      | <b>[FeBr(py)<sub>2</sub>(L<sup>3</sup>)]Br·0.5H<sub>2</sub>O</b>                  | <b>4[BF<sub>4</sub>]<sub>2</sub>·1.39MeCN-<br/>·0.125Et<sub>2</sub>O·0.25H<sub>2</sub>O</b>               |
|---------------------------------------------------------------------------------------------|-----------------------------------------------------------------------------------|--------------------------------------------------------------------------------------------------------|-----------------------------------------------------------------------------------|-----------------------------------------------------------------------------------------------------------|
| molecular formula                                                                           | C <sub>37</sub> H <sub>28</sub> B <sub>2</sub> F <sub>8</sub> FeN <sub>14</sub> O | C <sub>39.5</sub> H <sub>37.5</sub> B <sub>2</sub> F <sub>8</sub> FeN <sub>17.5</sub> O <sub>7.5</sub> | C <sub>37</sub> H <sub>28</sub> Br <sub>2</sub> FeN <sub>7</sub> O <sub>0.5</sub> | C <sub>49.28</sub> H <sub>35.93</sub> B <sub>2</sub> F <sub>8</sub> FeN <sub>7.39</sub> O <sub>0.38</sub> |
| <i>M<sub>r</sub></i>                                                                        | 914.20                                                                            | 1106.84                                                                                                | 978.17                                                                            | 967.16                                                                                                    |
| crystal class                                                                               | triclinic                                                                         | triclinic                                                                                              | monoclinic                                                                        | monoclinic                                                                                                |
| space group                                                                                 | <i>P</i> $\bar{1}$                                                                | <i>P</i> $\bar{1}$                                                                                     | <i>P</i> 2 <sub>1</sub> / <i>c</i>                                                | <i>P</i> 2 <sub>1</sub> / <i>c</i>                                                                        |
| <i>a</i> / Å                                                                                | 13.2776(3)                                                                        | 12.6361(6)                                                                                             | 12.8813(4)                                                                        | 18.9083(3)                                                                                                |
| <i>b</i> / Å                                                                                | 13.2858(4)                                                                        | 13.4938(7)                                                                                             | 14.1735(4)                                                                        | 48.0111(9)                                                                                                |
| <i>c</i> / Å                                                                                | 13.6211(3)                                                                        | 14.3473(7)                                                                                             | 19.6258(5)                                                                        | 20.0833(3)                                                                                                |
| $\alpha$ / °                                                                                | 102.783(2)                                                                        | 80.455(4)                                                                                              | –                                                                                 | –                                                                                                         |
| $\beta$ / °                                                                                 | 101.448(2)                                                                        | 89.884(4)                                                                                              | 108.553(4)                                                                        | 93.963(2)                                                                                                 |
| $\gamma$ / °                                                                                | 117.943(3)                                                                        | 76.630(4)                                                                                              | –                                                                                 | –                                                                                                         |
| <i>V</i> / Å <sup>3</sup>                                                                   | 1938.57(10)                                                                       | 2345.4(2)                                                                                              | 3396.93(18)                                                                       | 18188.2(5)                                                                                                |
| <i>Z</i>                                                                                    | 2                                                                                 | 2                                                                                                      | 4                                                                                 | 16                                                                                                        |
| $\mu\{\text{Cu-}K_{\alpha}\}$ / mm <sup>-1</sup>                                            | 3.935                                                                             | 3.492                                                                                                  | 6.630                                                                             | 3.335                                                                                                     |
| <i>D<sub>c</sub></i> / gcm <sup>-3</sup>                                                    | 1.566                                                                             | 1.567                                                                                                  | 1.553                                                                             | 1.413                                                                                                     |
| <i>T</i> / K                                                                                | 120                                                                               | 120                                                                                                    | 120                                                                               | 120                                                                                                       |
| measured reflections                                                                        | 14940                                                                             | 16691                                                                                                  | 14343                                                                             | 71868                                                                                                     |
| independent reflections                                                                     | 6681                                                                              | 8101                                                                                                   | 6680                                                                              | 35207                                                                                                     |
| <i>R</i> <sub>int</sub>                                                                     | 0.031                                                                             | 0.046                                                                                                  | 0.040                                                                             | 0.049                                                                                                     |
| parameters                                                                                  | 570                                                                               | 706                                                                                                    | 437                                                                               | 2412                                                                                                      |
| restraints                                                                                  | 0                                                                                 | 79                                                                                                     | 0                                                                                 | 107                                                                                                       |
| <i>R</i> <sub>1</sub> [ <i>F</i> <sub>0</sub> > 4σ( <i>F</i> <sub>0</sub> )] <sup>[a]</sup> | 0.040                                                                             | 0.075                                                                                                  | 0.057                                                                             | 0.113                                                                                                     |
| <i>wR</i> <sub>2</sub> , all data <sup>[b]</sup>                                            | 0.110                                                                             | 0.212                                                                                                  | 0.164                                                                             | 0.306                                                                                                     |
| goodness of fit                                                                             | 1.042                                                                             | 1.062                                                                                                  | 1.014                                                                             | 1.097                                                                                                     |
| $\Delta\rho_{\text{min/max}}$ / eÅ <sup>-3</sup>                                            | -0.43/0.56                                                                        | -0.53/0.76                                                                                             | -0.92/0.92                                                                        | -0.67/0.95                                                                                                |
| Flack parameter                                                                             | –                                                                                 | –                                                                                                      | –                                                                                 | –                                                                                                         |
| CCDC                                                                                        | 2288878                                                                           | 2288879                                                                                                | 2288880                                                                           | 2288881                                                                                                   |

$$^{[a]}R = \Sigma[|F_o| - |F_c|] / \Sigma|F_o| \quad ^{[b]}wR = [\Sigma w(F_o^2 - F_c^2) / \Sigma wF_o^4]^{1/2}$$

## Definitions of the structural parameters discussed in the paper

$V_{\text{Oh}}$  is the volume (in  $\text{\AA}^3$ ) of the  $\text{FeN}_6$  coordination octahedron in the complex,<sup>8</sup> which is typically  $<10 \text{\AA}^3$  in low-spin  $[\text{FeL}_2]^{2+}$  derivatives related to the compounds in this work, and  $\geq 11.5 \text{\AA}^3$  in their high-spin form.<sup>9</sup>

$\Sigma$  and  $\Theta$  are defined as follows:

$$\Sigma = \sum_{i=1}^{12} |90 - \beta_i| \qquad \Theta = \sum_{j=1}^{24} |60 - \gamma_j|$$

where  $\beta_i$  are the twelve *cis*-N–Fe–N angles about the iron atom and  $\gamma_j$  are the 24 unique N–Fe–N angles measured on the projection of two triangular faces of the octahedron along their common pseudo-threefold axis (Scheme S2).  $\Sigma$  is a general measure of the deviation of a metal ion from an ideal octahedral geometry, while  $\Theta$  more specifically indicates its distortion towards a trigonal prismatic structure. A perfectly octahedral complex gives  $\Sigma = \Theta = 0$ .<sup>8,10</sup>

Because the high-spin state of a complex has a much more plastic structure than the low-spin, this is reflected in  $\Sigma$  and  $\Theta$  which are usually much larger in the high-spin state. The absolute values of these parameters depend on the metal/ligand combination in the compound under investigation, however.

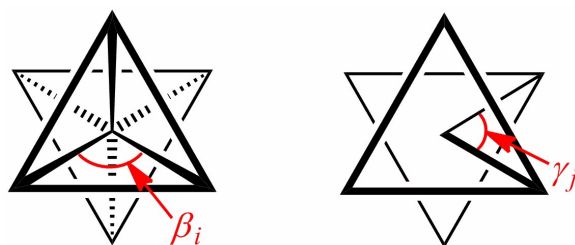

**Scheme S2** Angles used in the definitions of the coordination distortion parameters  $\Sigma$  and  $\Theta$ .

The parameters in Scheme S3 define an angular Jahn-Teller distortion, that is often observed in high-spin iron(II) complexes of meridional tridentate ligands ( $\theta \leq 90^\circ$ ,  $\phi \leq 180^\circ$ ).<sup>11</sup> They are also a useful indicator of the molecular geometry, in defining the disposition of the two ligands around the metal ion.

Significant changes in  $\phi$ , especially, during SCO can lead to hysteretic spin-transitions in solid complexes of this type.<sup>12</sup> However, spin-crossover can also be inhibited if  $\theta$  and  $\phi$  deviate too strongly from their ideal values in the high-spin state, because the associated rearrangement to a more regular low-spin coordination geometry ( $\theta \approx 90^\circ$ ,  $\phi \approx 180^\circ$ ) cannot be accommodated by a rigid solid lattice.<sup>11,13</sup>

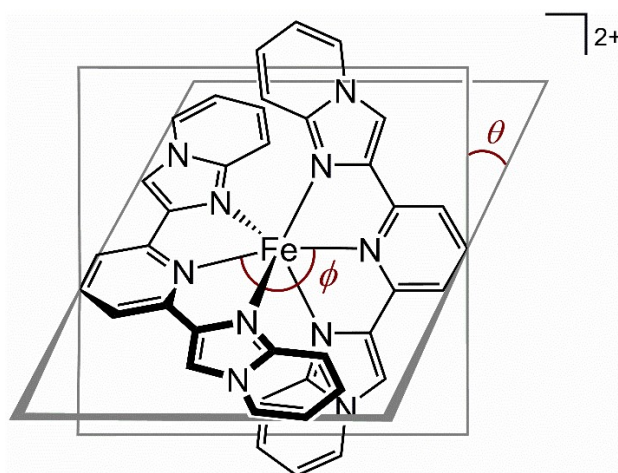

**Scheme S3** Definition of the Jahn-Teller distortion parameters  $\theta$  and  $\phi$  in  $[\text{Fe}(\text{L}^1)_2]^{2+}$ .

Typical values of all these parameters in  $[\text{FeL}_2]^{2+}$  complexes are listed in refs. 10 and 14-16.

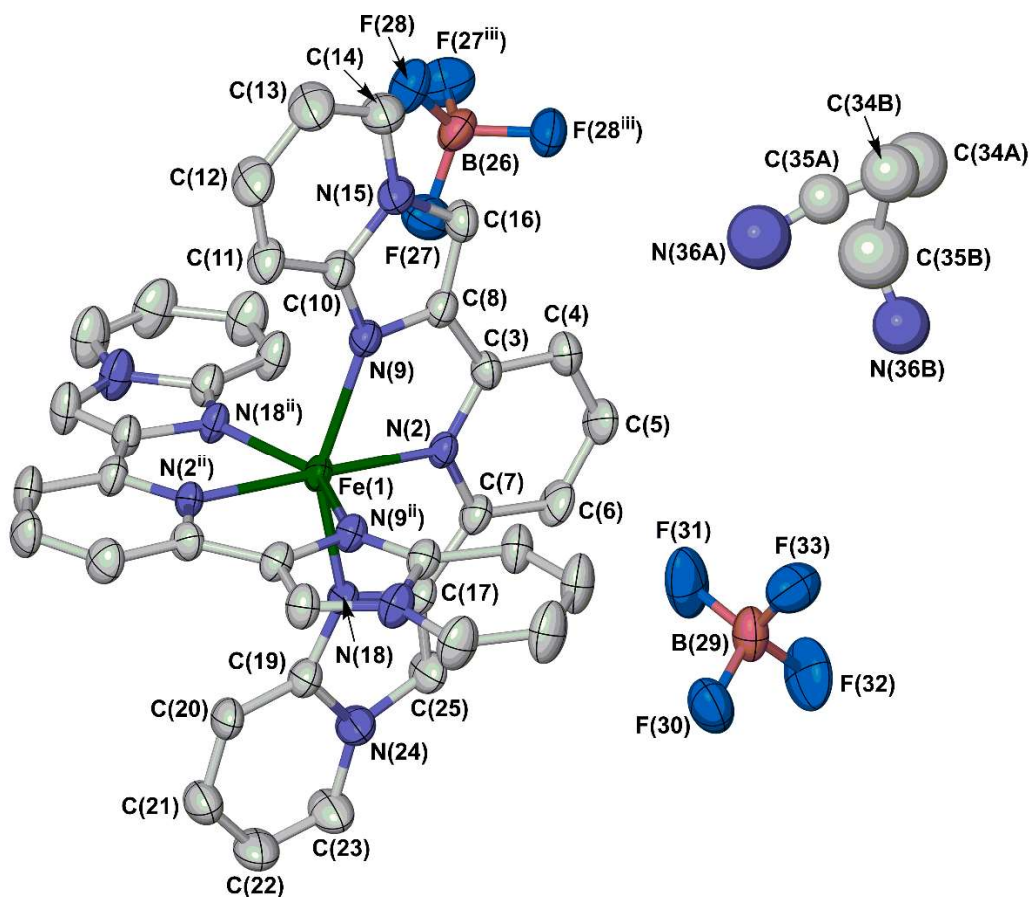

**Figure S5** The asymmetric unit of  $1[\text{BF}_4]_2 \cdot \text{MeCN}$ , showing the full atom numbering scheme. All displacement ellipsoids are at the 50 % probability level, and H atoms are omitted for clarity. Both orientations of the disordered solvent half-molecule are shown.

Colour code: C, white; B, pink; F, cyan; Fe, green; N, blue.

Symmetry codes: (ii)  $1/2-x, 3/2-y, z$ ; (iii)  $3/2-x, 3/2-y, z$ .

The asymmetric unit contains half a formula unit of the compound, with each residue in the Figure being half-occupied. Atoms Fe(1) and B(26) lie on crystallographic  $C_2$  sites, while half-anion B(29)-F(33) and the two 0.25-occupied MeCN disorder orientations both lie close to other  $C_2$  axes.

The refinement of  $1[\text{BF}_4]_2 \cdot m\text{MeNO}_2$  is isomorphous with this one, and uses the same atom numbering scheme (Figure S6).

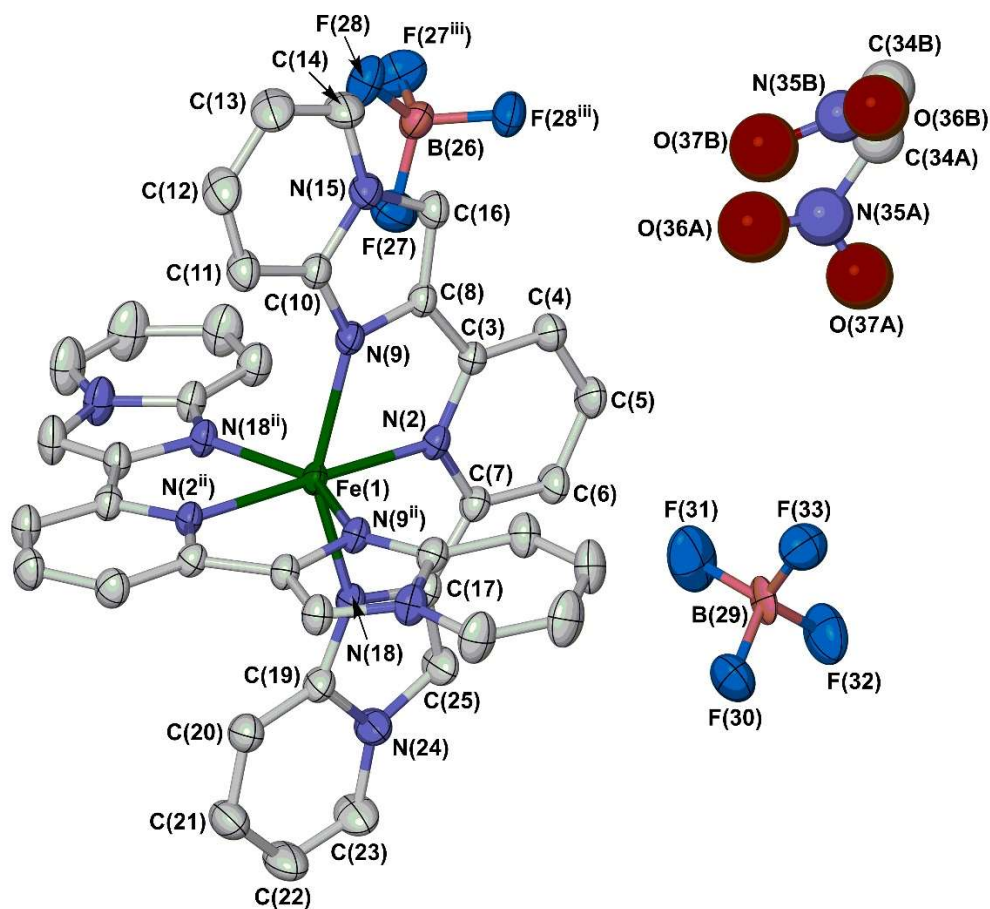

**Figure S6** The asymmetric unit of  $1[\text{BF}_4]_2 \cdot m\text{MeNO}_2$ , showing the full atom numbering scheme. All displacement ellipsoids are at the 50 % probability level, and H atoms are omitted for clarity. Both orientations of the partial disordered solvent molecule are shown.

Colour code: C, white; B, pink; F, cyan; Fe, green; N, blue; O, red.

Symmetry codes: (ii)  $1/2-x, 3/2-y, z$ ; (iii)  $3/2-x, 3/2-y, z$ .

This structure is isomorphous with  $1[\text{BF}_4]_2 \cdot \text{MeCN}$  (Figure S5), which is discussed on the previous page. The occupancy of the disordered nitromethane half-molecule site appears to be sub-stoichiometric, and was refined to a formula of  $m = 0.8$ .

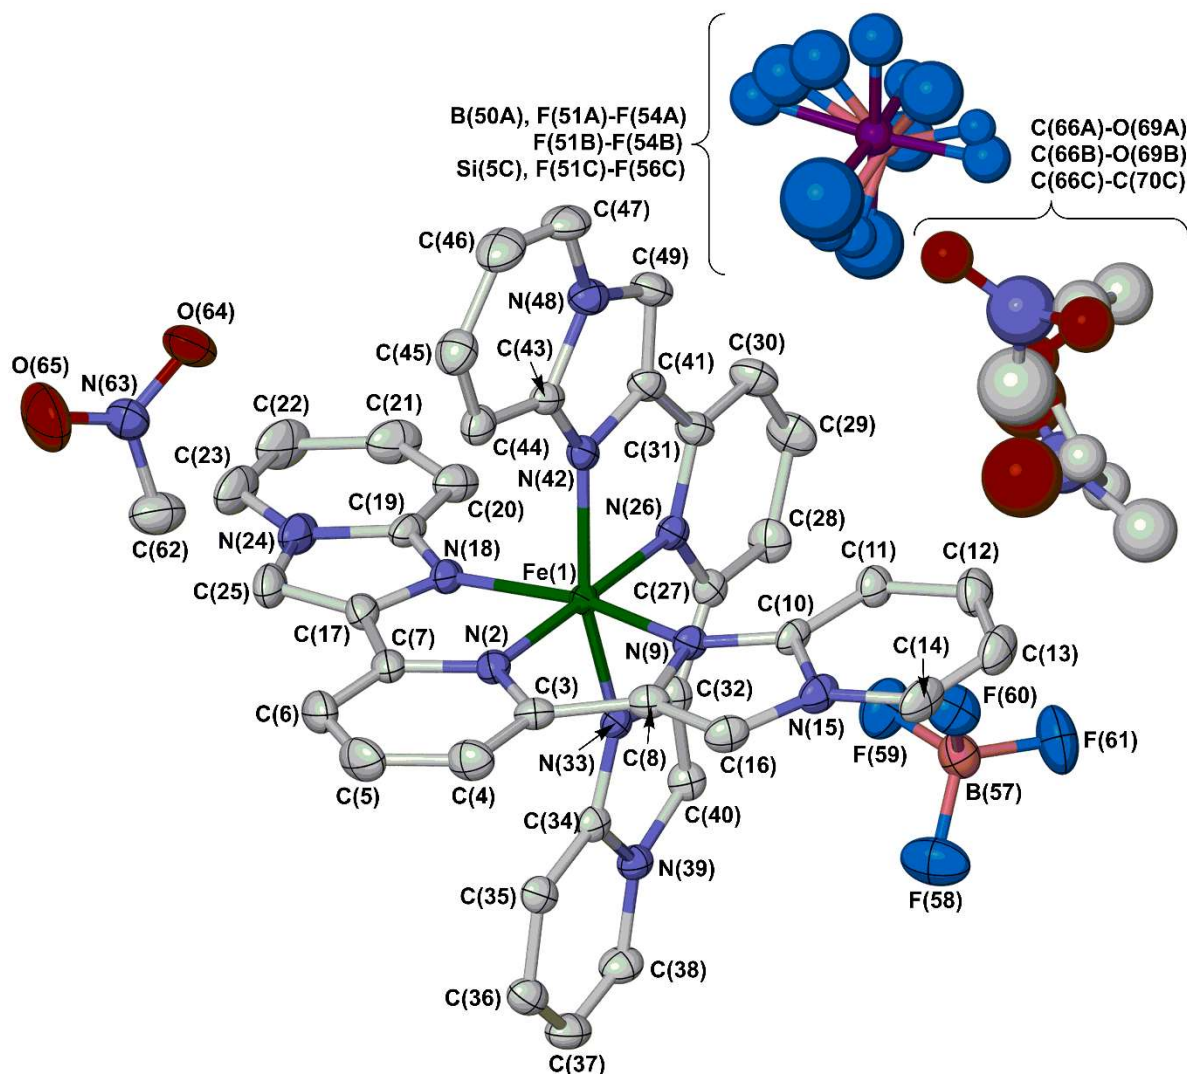

**Figure S7** The asymmetric unit of  $1[\text{BF}_4]_{1.6}[\text{SiF}_6]_{0.2} \cdot 1.7\text{MeNO}_2 \cdot 0.3\text{MeNO}_2$ , showing the full atom numbering scheme. All displacement ellipsoids are at the 50 % probability level, and H atoms are omitted for clarity. All orientations of the disordered anion and solvent sites are shown.

Colour code: C, white; B, pink; F, cyan; Fe, green; N, blue; O, red.

The partial  $\text{SiF}_6^{2-}$  was included in the disordered anion site, to account for an anomalously low  $U_{\text{iso}}$  parameter when the central atom of that anion was refined as a wholly occupied B atom. It could arise from reaction of adventitious fluoride (produced by hydrolysis of  $\text{BF}_4^-$ ) with the silica glass vial during the crystallisation process.<sup>17</sup> The model obeys charge balance, but there is no other evidence for the presence of  $\text{SiF}_6^{2-}$  in the material. The disordered solvent site is modelled as two nitromethane and one diethyl ether partial molecules.



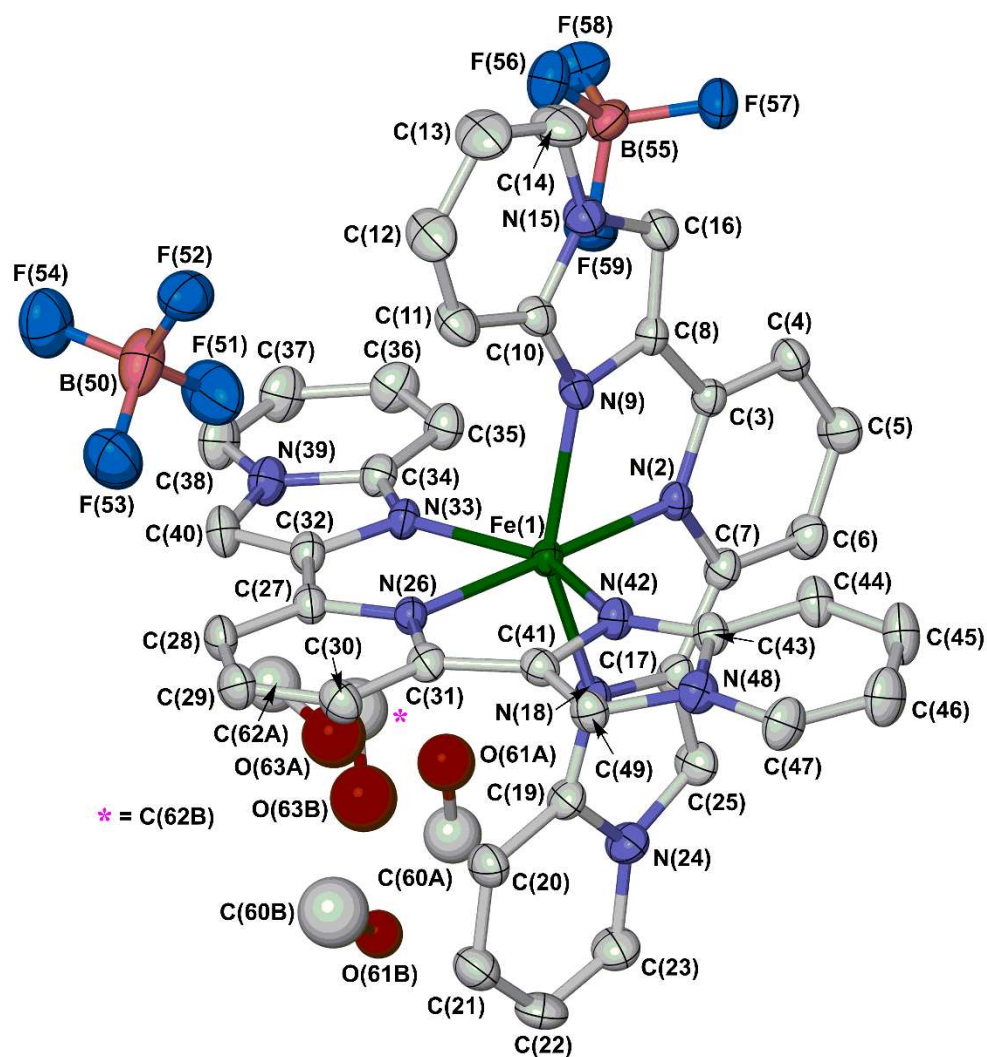

**Figure S8** The asymmetric unit of  $1[\text{BF}_4]_2 \cdot 1.5\text{MeOH}$ , showing the full atom numbering scheme. All displacement ellipsoids are at the 50 % probability level, and H atoms are omitted for clarity. All orientations of the disordered anion and solvent sites are shown.

Colour code: C, white; B, pink; F, cyan; Fe, green; N, blue; O, red.

This crystal has the same orthorhombic unit cell dimensions as  $1[\text{BF}_4]_2 \cdot \text{MeCN}$  and  $1[\text{BF}_4]_2 \cdot m\text{MeNO}_2$ , but lacks their crystallographic inversion symmetry.

**Table S2** Selected bond lengths and angles in the solvate crystals of **1**[BF<sub>4</sub>]<sub>2</sub> (Å, °, Å<sup>3</sup>). See Figures S5-S8 for the atom numbering scheme employed, and page S13 for definitions of the structural indices in the Table. Symmetry code: (ii) <sup>1</sup>/<sub>2</sub>-x, <sup>3</sup>/<sub>2</sub>-y, z.

|                                  | <b>1</b> [BF <sub>4</sub> ] <sub>2</sub> ·MeCN | <b>1</b> [BF <sub>4</sub> ] <sub>2</sub> · <i>m</i> MeNO <sub>2</sub> |                        | <b>1</b> [BF <sub>4</sub> ] <sub>1.6</sub> [SiF <sub>6</sub> ] <sub>0.2</sub> ·<br>1.7MeNO <sub>2</sub> ·0.3Et <sub>2</sub> O | <b>1</b> [BF <sub>4</sub> ] <sub>2</sub> ·1.5MeOH |
|----------------------------------|------------------------------------------------|-----------------------------------------------------------------------|------------------------|-------------------------------------------------------------------------------------------------------------------------------|---------------------------------------------------|
| Fe(1)–N(2)                       | 2.175(3)                                       | 2.168(3)                                                              | Fe(1)–N(2)             | 1.924(3)                                                                                                                      | 2.171(4)                                          |
| Fe(1)–N(9)                       | 2.199(4)                                       | 2.199(3)                                                              | Fe(1)–N(9)             | 1.979(3)                                                                                                                      | 2.193(4)                                          |
| Fe(1)–N(18)                      | 2.191(3)                                       | 2.195(3)                                                              | Fe(1)–N(18)            | 1.989(3)                                                                                                                      | 2.199(4)                                          |
|                                  |                                                |                                                                       | Fe(1)–N(26)            | 1.920(3)                                                                                                                      | 2.171(4)                                          |
|                                  |                                                |                                                                       | Fe(1)–N(33)            | 1.998(3)                                                                                                                      | 2.194(4)                                          |
|                                  |                                                |                                                                       | Fe(1)–N(42)            | 2.002(3)                                                                                                                      | 2.201(4)                                          |
| N(2)–Fe(1)–N(9)                  | 73.84(13)                                      | 73.96(10)                                                             | N(2)–Fe(1)–N(9)        | 80.37(11)                                                                                                                     | 73.84(15)                                         |
| N(2)–Fe(1)–N(18)                 | 74.41(12)                                      | 74.15(10)                                                             | N(2)–Fe(1)–N(18)       | 80.71(12)                                                                                                                     | 74.16(16)                                         |
| N(2)–Fe(1)–N(2 <sup>ii</sup> )   | 176.42(18)                                     | 175.81(14)                                                            | N(2)–Fe(1)–N(26)       | 178.78(11)                                                                                                                    | 175.96(14)                                        |
| N(2)–Fe(1)–N(9 <sup>ii</sup> )   | 108.75(12)                                     | 109.08(10)                                                            | N(2)–Fe(1)–N(33)       | 98.99(11)                                                                                                                     | 101.71(16)                                        |
| N(2)–Fe(1)–N(18 <sup>ii</sup> )  | 103.08(12)                                     | 102.90(10)                                                            | N(2)–Fe(1)–N(42)       | 99.76(11)                                                                                                                     | 109.53(16)                                        |
| N(9)–Fe(1)–N(18)                 | 148.15(12)                                     | 148.01(10)                                                            | N(9)–Fe(1)–N(18)       | 161.06(12)                                                                                                                    | 147.96(16)                                        |
|                                  |                                                |                                                                       | N(9)–Fe(1)–N(26)       | 100.73(11)                                                                                                                    | 107.76(15)                                        |
| N(9)–Fe(1)–N(9 <sup>ii</sup> )   | 93.03(19)                                      | 92.54(14)                                                             | N(9)–Fe(1)–N(33)       | 92.03(10)                                                                                                                     | 93.82(15)                                         |
| N(9)–Fe(1)–N(18 <sup>ii</sup> )  | 94.79(13)                                      | 95.47(10)                                                             | N(9)–Fe(1)–N(42)       | 91.06(11)                                                                                                                     | 92.44(14)                                         |
|                                  |                                                |                                                                       | N(18)–Fe(1)–N(26)      | 98.20(11)                                                                                                                     | 104.27(15)                                        |
| N(18)–Fe(1)–N(18 <sup>ii</sup> ) | 94.64(19)                                      | 93.93(15)                                                             | N(18)–Fe(1)–N(33)      | 91.78(10)                                                                                                                     | 94.13(15)                                         |
|                                  |                                                |                                                                       | N(18)–Fe(1)–N(42)      | 91.28(11)                                                                                                                     | 96.67(16)                                         |
|                                  |                                                |                                                                       | N(26)–Fe(1)–N(33)      | 80.46(11)                                                                                                                     | 74.58(16)                                         |
|                                  |                                                |                                                                       | N(26)–Fe(1)–N(42)      | 80.79(11)                                                                                                                     | 74.26(16)                                         |
|                                  |                                                |                                                                       | N(33)–Fe(1)–N(42)      | 161.24(11)                                                                                                                    | 148.66(17)                                        |
| <i>V</i> <sub>Oh</sub>           | 12.901(15)                                     | 12.873(11)                                                            | <i>V</i> <sub>Oh</sub> | 9.896(8)                                                                                                                      | 12.908(15)                                        |
| $\Sigma$                         | 144.4(5)                                       | 145.2(4)                                                              | $\Sigma$               | 81.5(4)                                                                                                                       | 143.5(5)                                          |
| $\Theta$                         | 473                                            | 476                                                                   | $\Theta$               | 268                                                                                                                           | 470                                               |
| $\phi$                           | 176.42(18)                                     | 175.81(14)                                                            | $\phi$                 | 178.78(11)                                                                                                                    | 175.96(14)                                        |
| $\theta$                         | 89.66(3)                                       | 89.87(2)                                                              | $\theta$               | 88.89(2)                                                                                                                      | 89.93(3)                                          |

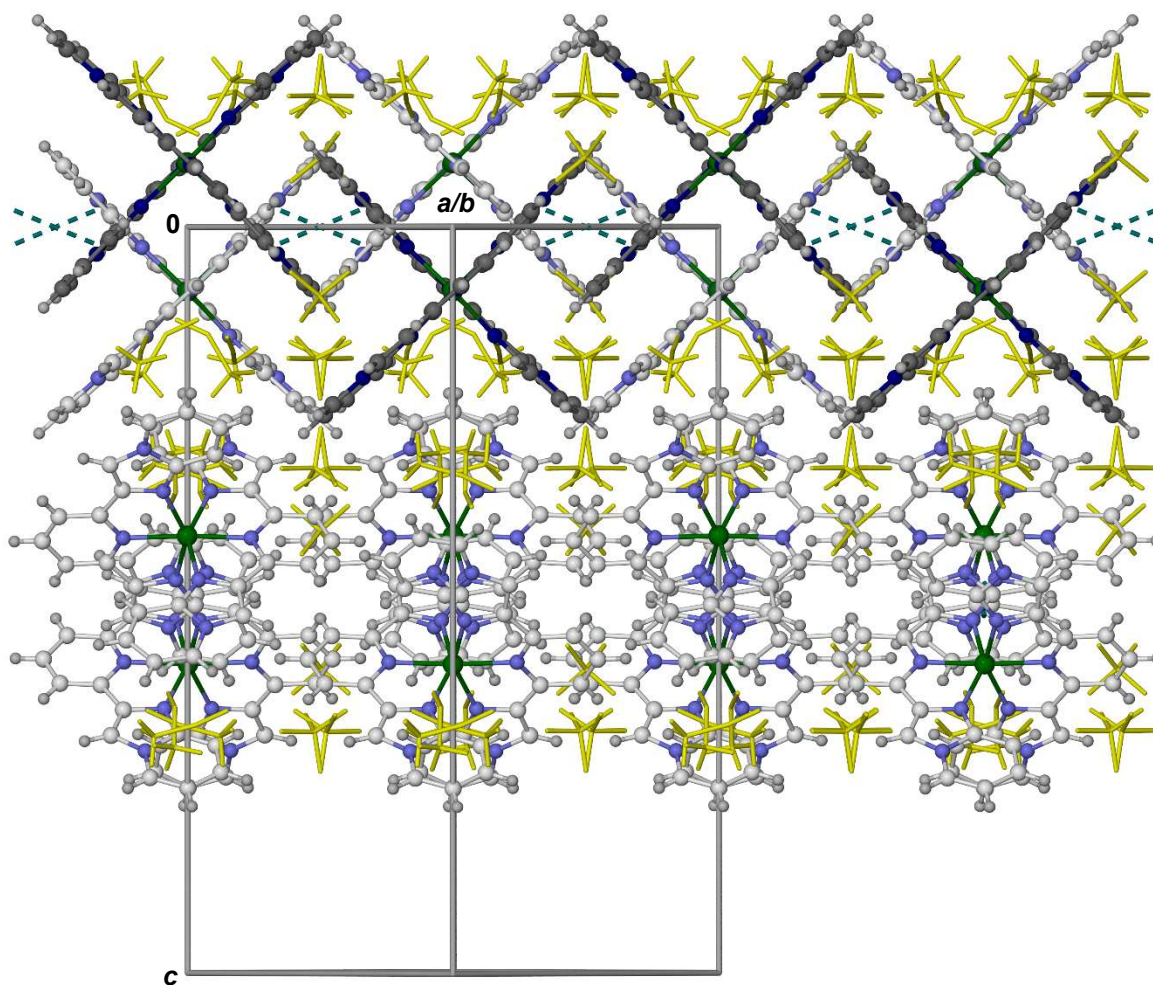

**Figure S9** Packing diagram of  $1[\text{BF}_4]_2 \cdot \text{MeCN}$ , showing the association of the molecules into zig-zag chains through  $\pi \cdots \pi$  interactions between their  $L^1$  imidazopyridine residues (shown as dotted lines). One cation chain is highlighted with dark colouration, while the anions and disordered solvent molecules are de-emphasised for clarity.

Colour code: C, white or dark grey; H, pale grey; Fe, green; N, pale or dark blue;  $\text{BF}_4^-$  and MeCN, yellow.

The chains alternate along the  $[1\bar{1}0]$  and  $[\bar{1}10]$  crystal vectors, down the  $c$  axis. There is one unique  $\pi \cdots \pi$  interaction in the lattice. The interacting imidazopyridine groups  $[\text{C}(17)\text{-C}(25)]$  and  $[\text{C}(17^{\text{iv}})\text{-C}(25^{\text{iv}})]$  are coplanar by symmetry and separated by  $3.330(15)$  Å [symmetry code: (iv)  $-x, 1-y, -z$ ]. Their centroids are horizontally offset by  $1.27$  Å.

The corresponding interaction in the isomorphous crystal  $1[\text{BF}_4]_2 \cdot m\text{MeNO}_2$  has the overlapping imidazopyridine groups  $3.351(11)$  Å apart, with a horizontal offset of  $1.23$  Å.

There are no short edge-to-face  $\text{C-H} \cdots \pi$  contacts in the lattice.

The crystal packing in  $1[\text{BF}_4]_2 \cdot 1.5\text{MeOH}$  is essentially the same as shown here, but with minor differences reflecting the different space group of the methanol solvate (Figure S13).

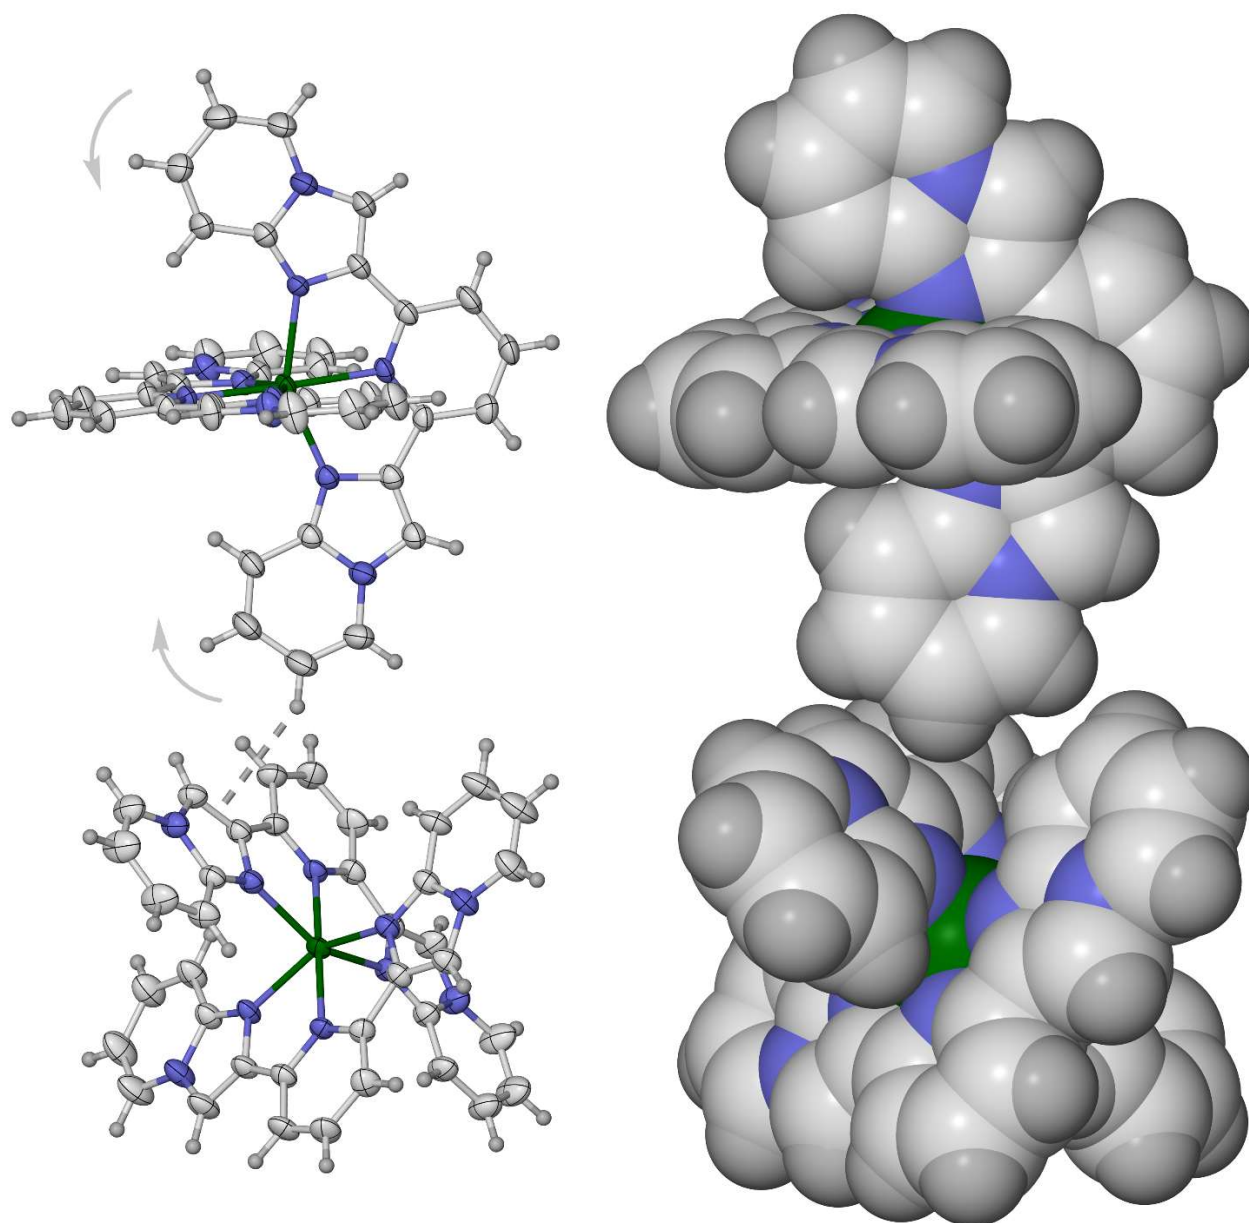

**Figure S10** Two  $[\text{Fe}(\text{L}^1)_2]^{2+}$  molecules in neighbouring cation chains in  $1[\text{BF}_4]_2 \cdot \text{MeCN}$ , related by  $1-x, \frac{1}{2}+y, \frac{1}{2}-z$ , shown as thermal ellipsoid (left) and space-filling (right) plots. The intermolecular  $\text{C}-\text{H} \cdots \pi$  contact that may inhibit thermal SCO in  $1[\text{BF}_4]_2 \cdot \text{MeCN}$ ,  $1[\text{BF}_4]_2 \cdot m\text{MeNO}_2$  and  $1[\text{BF}_4]_2 \cdot 1.5\text{MeOH}$  is shown in grey. This is an alternative view of Figure 1 in the main article. Colour code: C, white; H, pale grey; Fe, green; N, blue.

The highlighted interaction is a 2.9 Å contact between an H atom and the centroid of a C–C bond, which is equal to the sum of the Van der Waals radii of an H atom and an aromatic ring.<sup>17</sup> Although the interaction is weak, it is positioned to inhibit displacement of those imidazopyridyl groups in the direction shown, which would accompany SCO.

Each  $C_2$ -symmetric cation donates two and accepts two of these  $\text{C}-\text{H} \cdots \pi$  contacts, as shown in Figure 1.

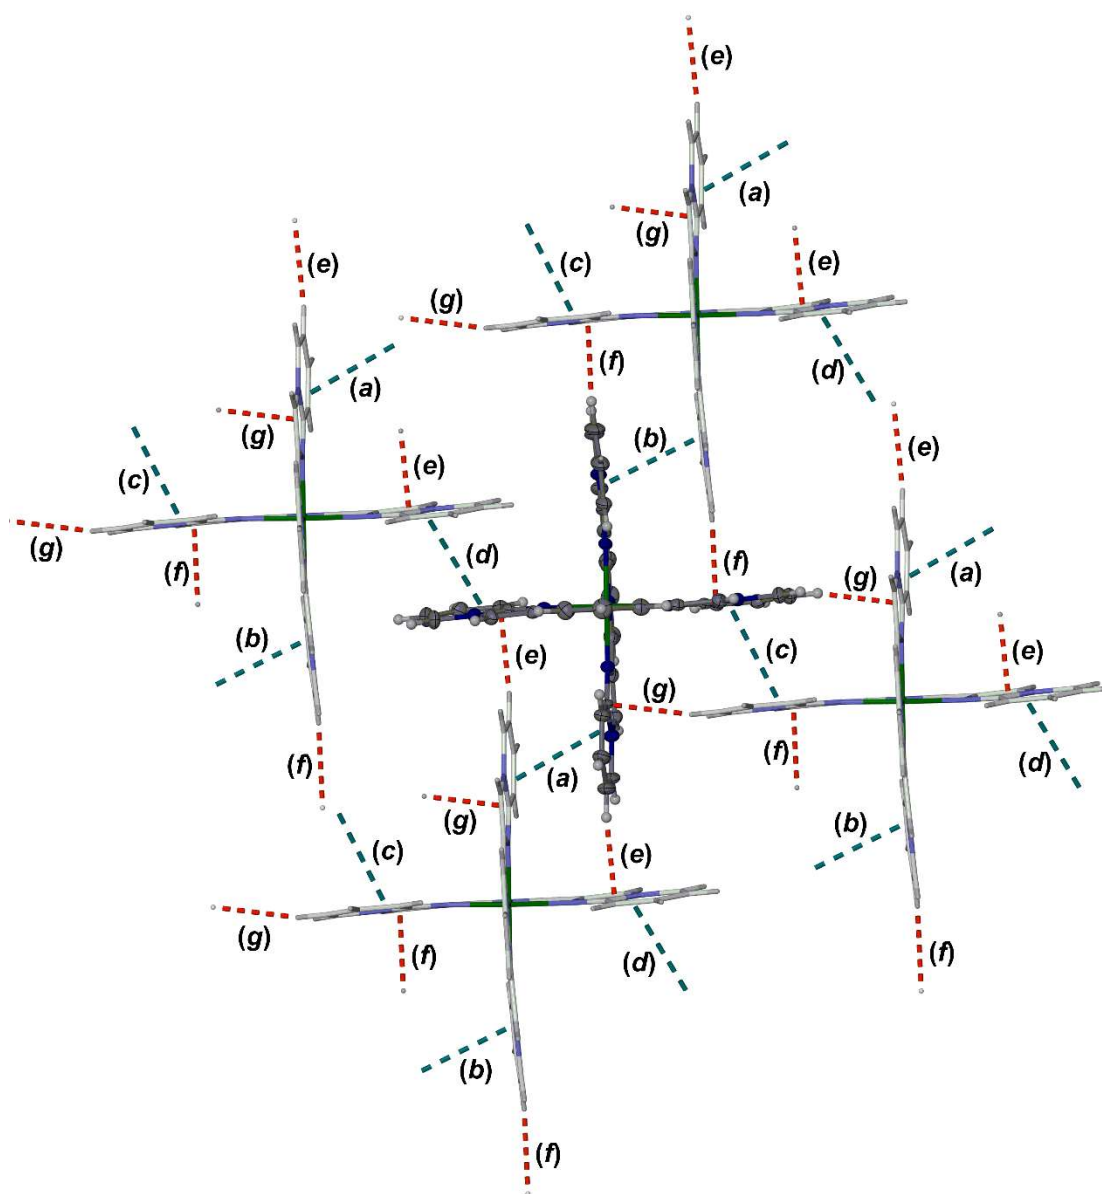

**Figure S11** A terpyridine embrace layer of  $1[\text{BF}_4]_{1.6}[\text{SiF}_6]_{0.2} \cdot 1.7\text{MeNO}_2 \cdot 0.3\text{Et}_2\text{O}$ , showing the  $\pi \cdots \pi$  (cyan) and  $\text{C-H} \cdots \pi$  (red) intermolecular contacts. Each interaction is labelled with a code corresponding to that in Table S3. One cation is highlighted with dark colouration, while the anions and solvent molecules are not shown.

Colour code: C, white or dark grey; H, pale grey; Fe, green; N, pale or dark blue.

One imidazopyridyl group in each molecule, C(41)-C(49), does not form a close  $\text{C-H} \cdots \pi$  contact with its nearest neighbour.

**Table S3** Intermolecular interactions in the crystal structure of **1**[BF<sub>4</sub>]<sub>1.6</sub>[SiF<sub>6</sub>]<sub>0.2</sub>·1.7MeNO<sub>2</sub>·0.3Et<sub>2</sub>O (Å, °). See Figure S7 for the atom numbering scheme employed, while the codes for each interaction are those in Figure S11. Symmetry codes: (v) 1-x, 1-y, 1-z; (vi) 2-x, -y, -z; (vii) 2-x, -y, 1-z; (viii) 1-x, 1-y, -z.

| $\pi \cdots \pi$                                                                    | Dihedral angle | Interplanar spacing | Horizontal offset |                |
|-------------------------------------------------------------------------------------|----------------|---------------------|-------------------|----------------|
| [C(8)-C(16)] $\cdots$ [C(8 <sup>v</sup> )-C(16 <sup>v</sup> )] ( <b>a</b> )         | 0              | 3.311(15)           | 1.72              |                |
| [C(17)-C(25)] $\cdots$ [C(17 <sup>vi</sup> )-C(25 <sup>vi</sup> )] ( <b>b</b> )     | 0              | 3.420(17)           | 1.27              |                |
| [C(32)-C(40)] $\cdots$ [C(32 <sup>vii</sup> )-C(40 <sup>vii</sup> )] ( <b>c</b> )   | 0              | 3.46(2)             | 1.63              |                |
| [C(41)-C(49)] $\cdots$ [C(41 <sup>viii</sup> )-C(49 <sup>viii</sup> )] ( <b>d</b> ) | 0              | 3.497(14)           | 1.74              |                |
| C-H $\cdots$ $\pi$ <sup>a</sup>                                                     | C-H            | H $\cdots$ C        | C $\cdots$ C      | C-H $\cdots$ C |
| C(13)-H(13) $\cdots$ C(44 <sup>v</sup> ) ( <b>e</b> )                               | 0.95           | 2.76                | 3.681(5)          | 162.3          |
| C(22)-H(22) $\cdots$ C(35 <sup>vi</sup> ) ( <b>f</b> )                              | 0.95           | 2.73                | 3.656(5)          | 166.5          |
| C(37)-H(37) $\cdots$ C(10 <sup>vii</sup> ) ( <b>g</b> )                             | 0.95           | 2.74                | 3.608(5)          | 151.9          |
| C(46)-H(46) $\cdots$ C(20 <sup>viii</sup> ) <sup>b</sup>                            | 0.95           | 2.95                | 3.819(6)          | 152.8          |

<sup>a</sup>The sum of the Pauling van der Waals radii of an H atom and an aromatic ring is 2.9 Å.<sup>18</sup> <sup>b</sup>This is the closest edge-to-face C-H $\cdots$  $\pi$  contact involving imidazopyridyl group C(41)-C(49). It is essentially equal to the sum of the van der Waals radii of those groups, and is not shown in Figure S11.

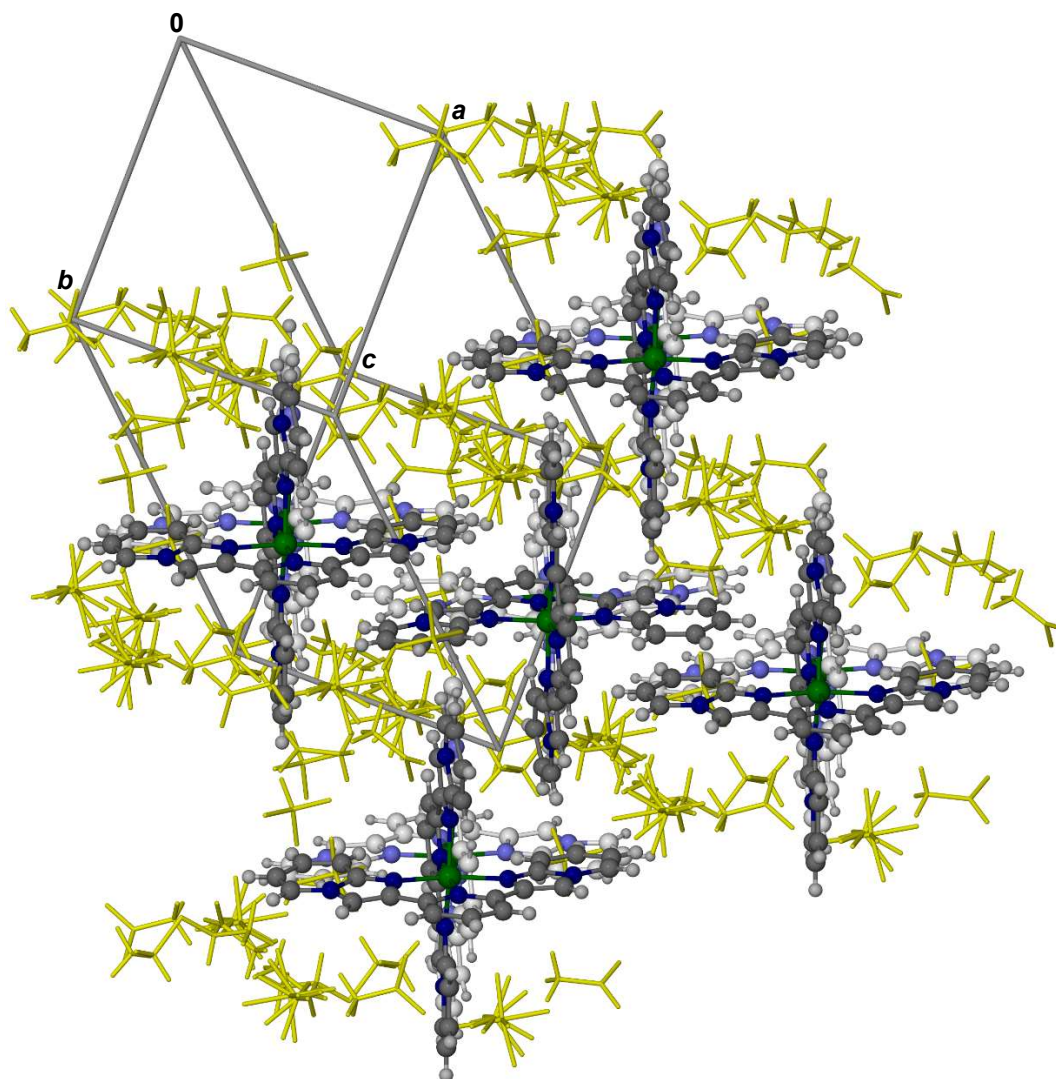

**Figure S12** Full packing diagram of  $1[\text{BF}_4]_{1.6}[\text{SiF}_6]_{0.2} \cdot 1.7\text{MeNO}_2 \cdot 0.3\text{Et}_2\text{O}$ , showing two terpyridine embrace cation layers which are distinguished with pale and dark colouration. The anions and disordered solvent molecules are de-emphasised for clarity.

Colour code: C, white or dark grey; H, pale grey; Fe, green; N, pale or dark blue;  $\text{BF}_4^-$ ,  $\text{SiF}_6^{2-}$  and MeCN, yellow.

The complex molecules pack into layers parallel to the  $(\bar{1}10)$  crystal plane, through interdigitation of their imidazopyridine ligand arms (Figures S11 and S13).

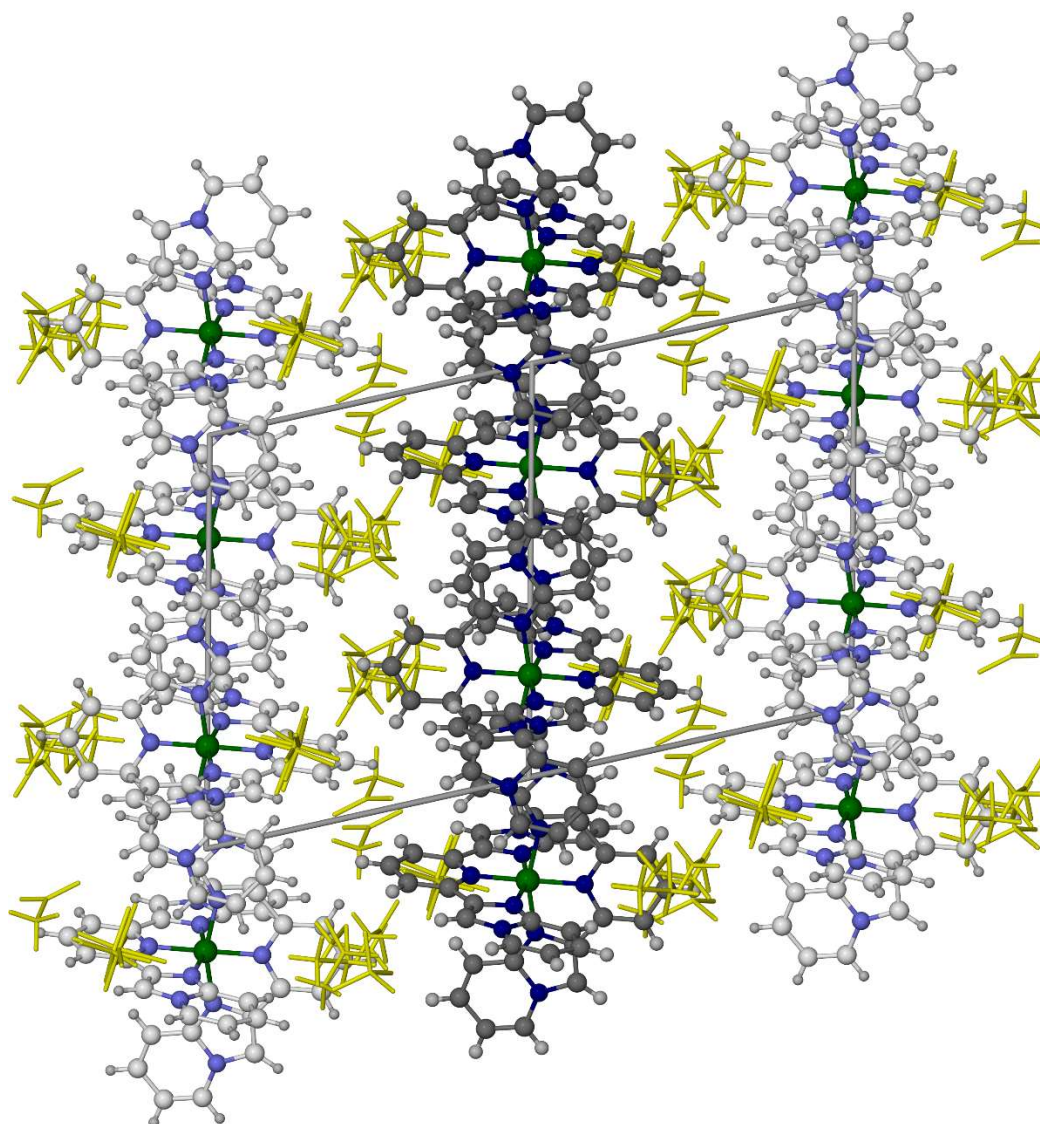

**Figure S13** Alternative packing diagram of  $1[\text{BF}_4]_{1.6}[\text{SiF}_6]_{0.2} \cdot 1.7\text{MeNO}_2 \cdot 0.3\text{Et}_2\text{O}$ , showing the terpyridine embrace cation layers. One layer is highlighted with dark colouration, and the anions and disordered solvent molecules are de-emphasised for clarity. The view is parallel to the  $[\bar{1}10]$  crystal vector, with the  $c$  axis vertical.

Colour code: C, white or dark grey; H, pale grey; Fe, green; N, pale or dark blue;  $\text{BF}_4^-$ ,  $\text{SiF}_6^{2-}$  and MeCN, yellow.

The complex molecules pack into layers parallel to the  $(\bar{1}10)$  crystal plane, through interdigitation of their imidazopyridine ligand arms (Figure S11).



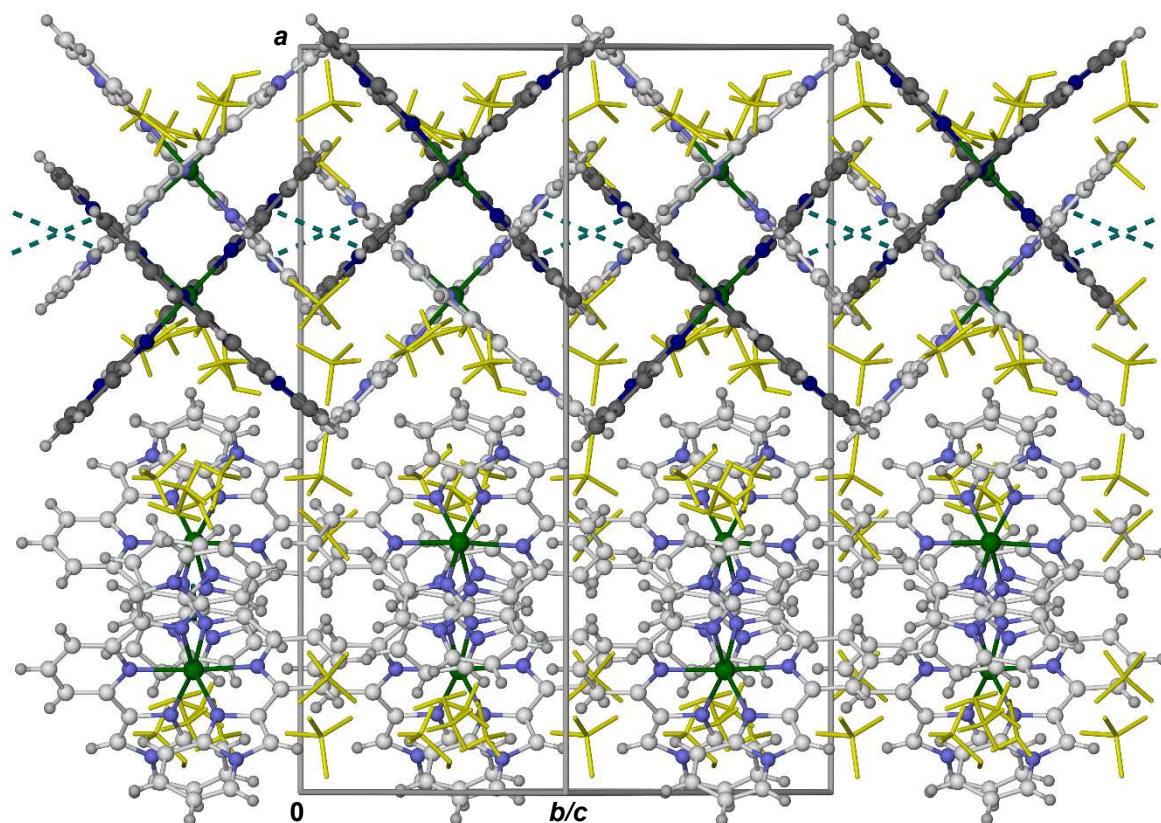

**Figure S14** Packing diagram of  $1[\text{BF}_4]_2 \cdot 1.5\text{MeOH}$ , showing the association of the molecules into zig-zag chains through  $\pi \cdots \pi$  interactions between their  $L^1$  imidazopyridine residues (shown as dotted lines). One cation chain is highlighted with dark colouration, while the anions and disordered solvent molecules are de-emphasised for clarity.

Colour code: C, white or dark grey; H, pale grey; Fe, green; N, pale or dark blue;  $\text{BF}_4^-$  and MeOH, yellow.

The chains alternate along the  $[01\bar{1}]$  and  $[0\bar{1}1]$  crystal vectors, down the  $a$  axis. There is one unique  $\pi \cdots \pi$  interaction in the lattice. The dihedral angle between the least squares planes of the interacting imidazopyridine groups  $[\text{C}(17)\text{-C}(25)]$  and  $[\text{C}(3^{\text{ix}})\text{-C}(40^{\text{ix}})]$  is  $4.5(2)^\circ$ ; the average distance between the overlapping rings is  $3.275(17)$  Å; and their centroids are horizontally offset by  $1.38$  Å [symmetry code:  $(\text{ix}) \frac{3}{2}-x, \frac{1}{2}+y, \frac{1}{2}+z$ ].

There are no short edge-to-face  $\text{C-H} \cdots \pi$  contacts in the lattice.

Although they adopt different space groups, the packing in this crystal is the essentially same as  $1[\text{BF}_4]_2 \cdot \text{MeCN}$  and  $1[\text{BF}_4]_2 \cdot m\text{MeNO}_2$  (Figure S9). The lattices differ in their  $\pi \cdots \pi$ -stacked molecules, which are related by the  $n$ -glide plane in  $1[\text{BF}_4]_2 \cdot 2.5\text{MeOH}$ , and by an inversion centre in  $1[\text{BF}_4]_2 \cdot \text{MeCN}$  and  $1[\text{BF}_4]_2 \cdot m\text{MeNO}_2$ .

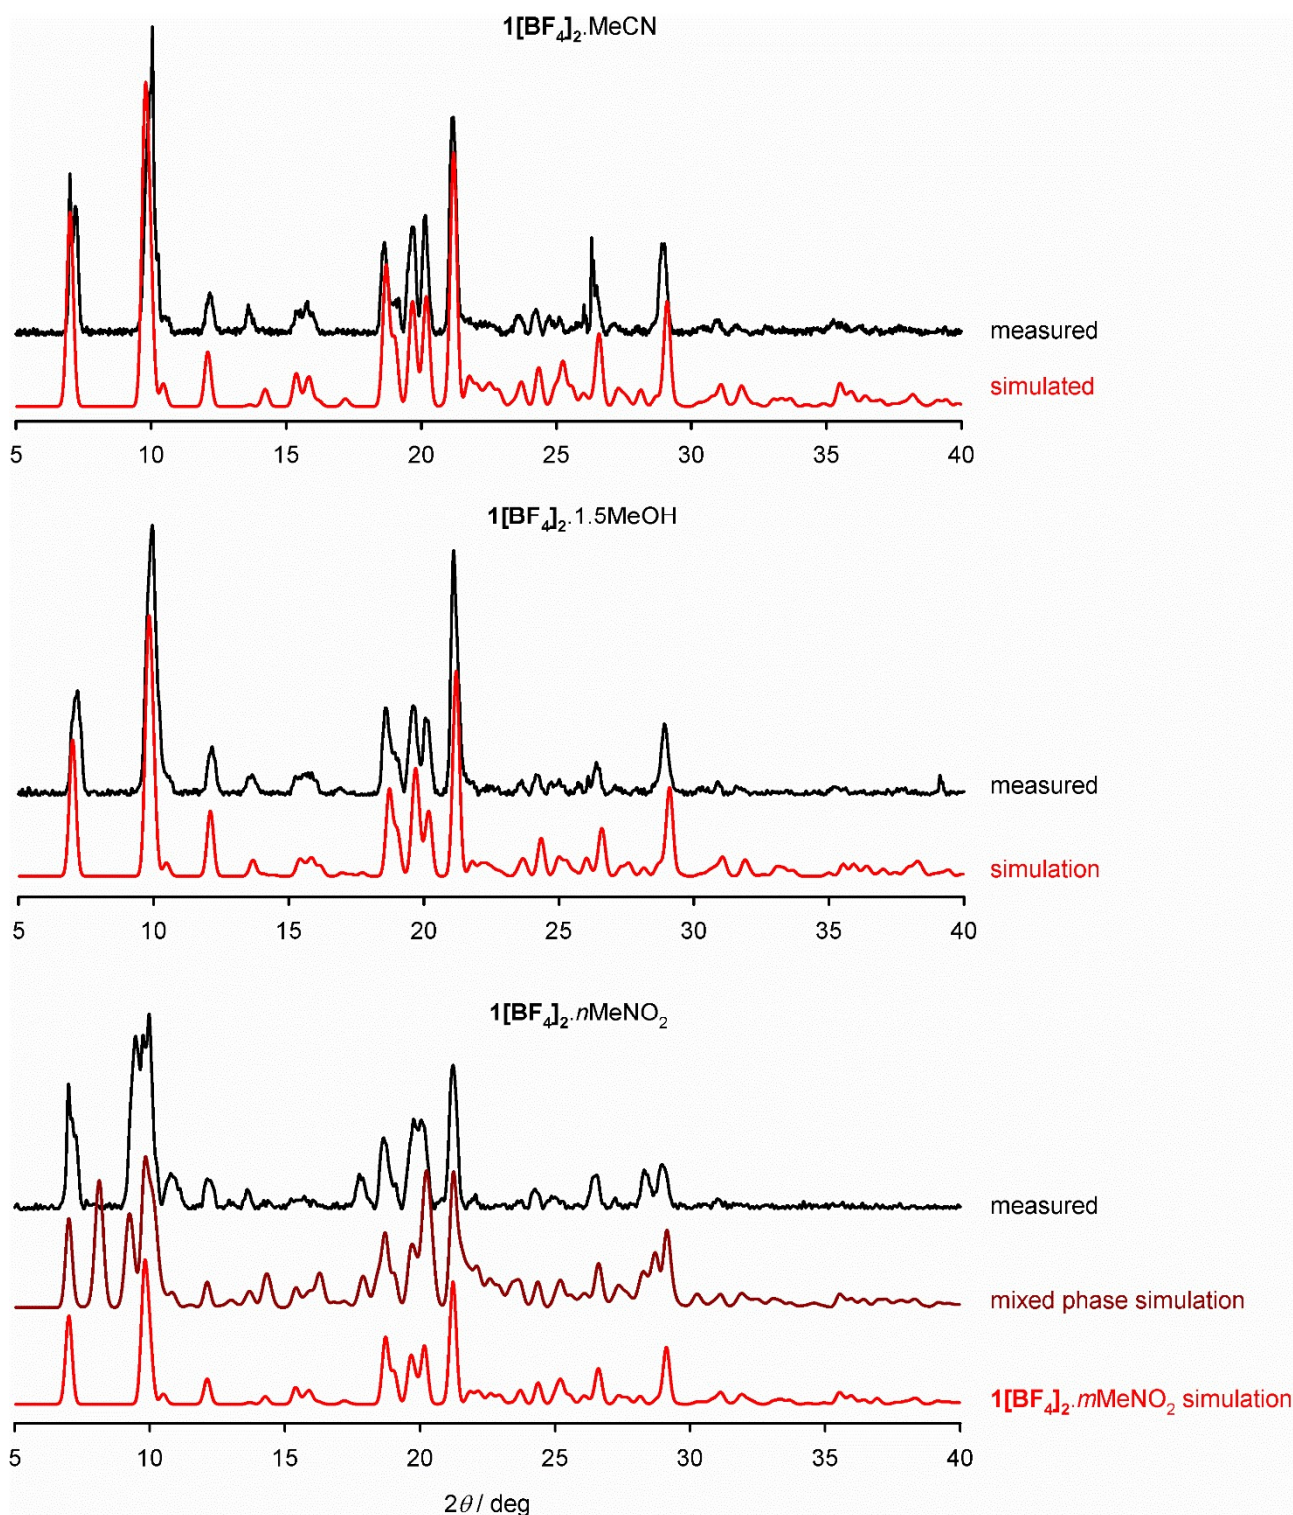

**Figure S15** Room temperature X-ray powder diffraction data for the crystallographically characterised solvates of  $1[\text{BF}_4]_2$  (black), and simulations based on their low temperature crystal structures (red).

The samples retain crystallinity upon exposure to air and do not undergo gross structural changes upon loss or exchange of their lattice solvent.

The mixed-phase simulation of the nitromethane solvate is based on a 1:1 mixture of the  $1[\text{BF}_4]_2 \cdot m\text{MeNO}_2$  and  $1[\text{BF}_4]_{1.6}[\text{SiF}_6]_{0.2} \cdot 1.7\text{MeNO}_2 \cdot 0.3\text{Et}_2\text{O}$  crystal structures. While a peak at  $2\theta = 8.1^\circ$  in that simulation is not found experimentally, otherwise it is a reasonable match for the data. We conclude the sample is a mixture of high-spin  $1[\text{BF}_4]_2 \cdot m\text{MeNO}_2$  and a second phase related to  $1[\text{BF}_4]_{1.6}[\text{SiF}_6]_{0.2} \cdot 1.7\text{MeNO}_2 \cdot 0.3\text{Et}_2\text{O}$ , which is SCO-active (Figure S16).

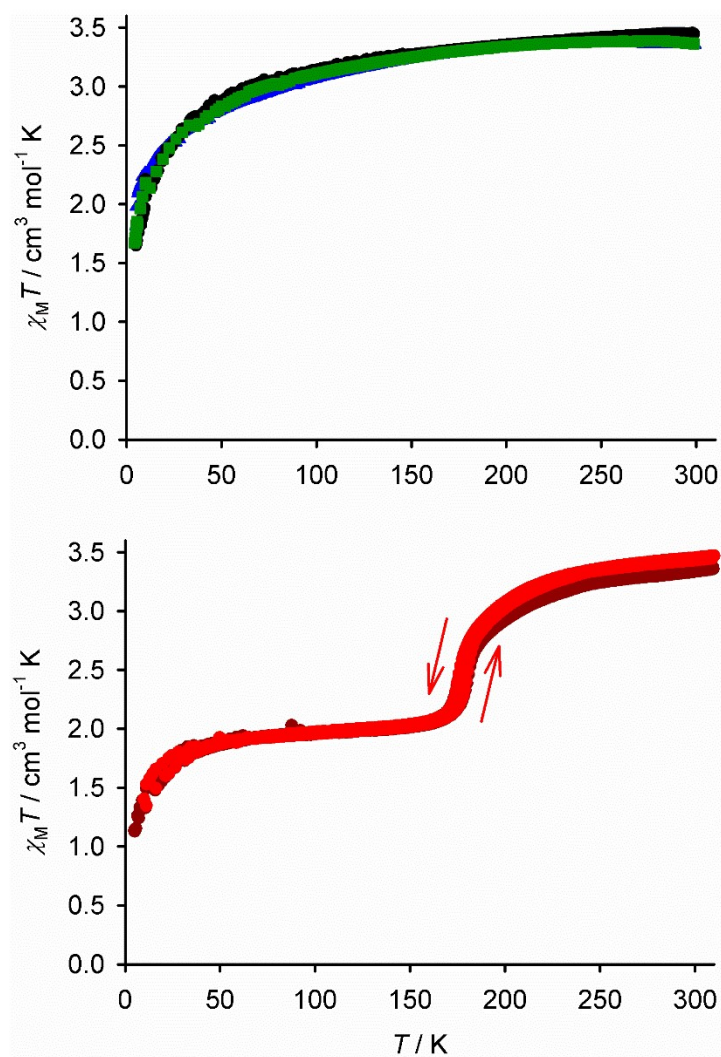

**Figure S16** Top: Variable temperature magnetic susceptibility data from freshly crystallised  $1[\text{BF}_4]_2 \cdot \text{MeCN}$  (black),  $1[\text{BF}_4]_2 \cdot 1.5\text{MeOH}$  (green) and  $1[\text{BF}_4]_2 \cdot n\text{Me}_2\text{CO}$  (blue). Bottom: Magnetic susceptibility data from a mixed-phase sample  $1[\text{BF}_4]_2 \cdot n\text{MeNO}_2$  (Figure S15). Two cooling and warming scans of that material are shown, in pale and dark red colouration respectively. The samples were protected against solvent loss during the measurement.

The samples in the top graph are all high-spin, which is consistent with the crystal structures of  $1[\text{BF}_4]_2 \cdot \text{MeCN}$  and  $1[\text{BF}_4]_2 \cdot 1.5\text{MeOH}$ . It is unclear if  $1[\text{BF}_4]_2 \cdot n\text{Me}_2\text{CO}$  is isomorphous with those solvates however, since its powder pattern was not measured (that sample was only available in mg quantities, because of the poor solubility of the complex in acetone).

The nitromethane solvate sample contains (at least) two different phases by powder diffraction (Figure S15). These data imply it is a mixture of high-spin and SCO-active material, which is consistent with a combination of the two crystallographically characterised phases. Iron(II) complexes related to  $1[\text{BF}_4]_{1.6}[\text{SiF}_6]_{0.2} \cdot 1.7\text{MeNO}_2 \cdot 0.3\text{Et}_2\text{O}$ , that crystallise in a terpyridine embrace lattice, often show abrupt thermal spin-transitions.<sup>19,20</sup>

Since the two scans in the lower graph are identical the partial SCO in the sample is not influenced by *in situ* solvent loss, which presumably happened before the measurement took place.

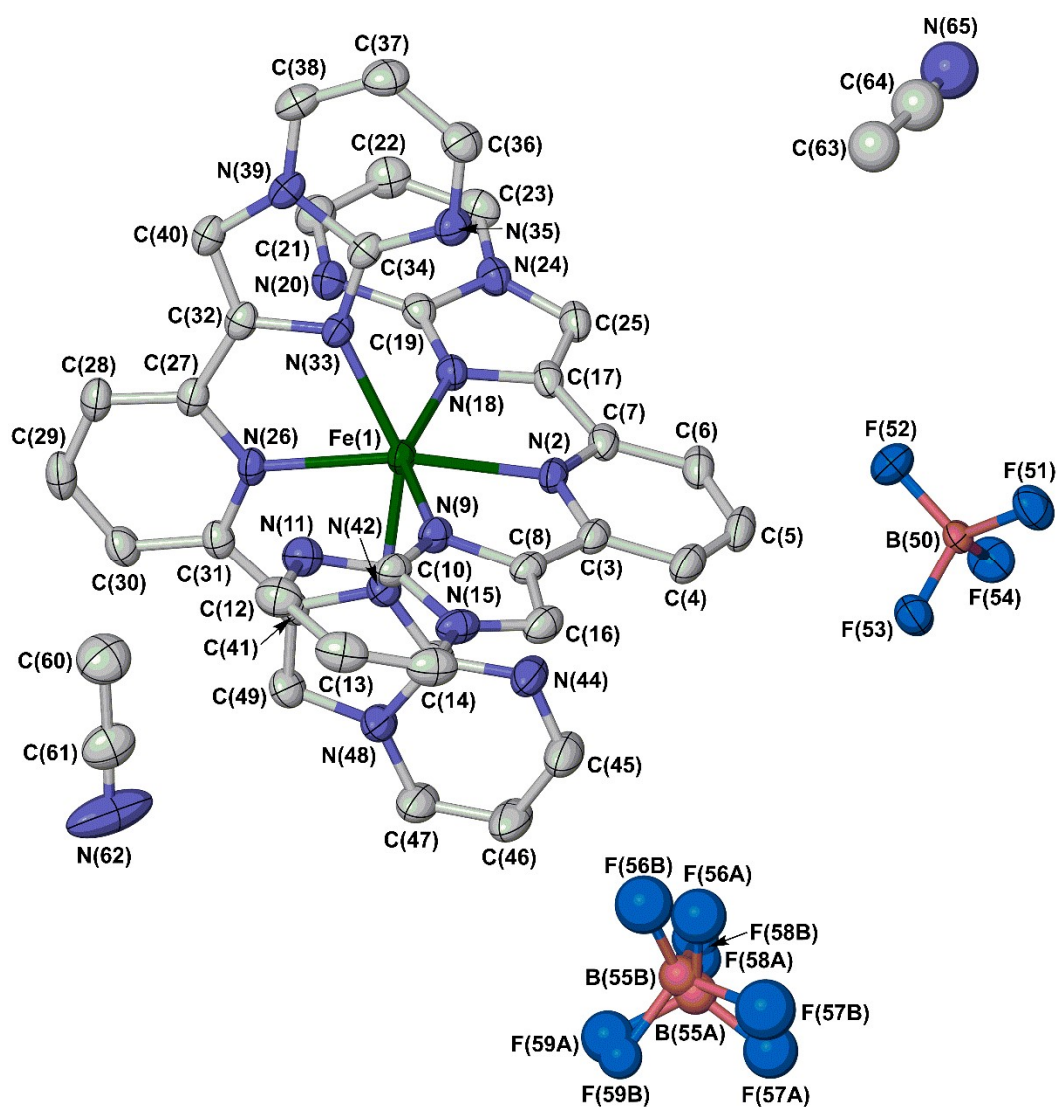

**Figure S17** The asymmetric unit of  $2[\text{BF}_4]_2 \cdot 1.5\text{MeCN}$ , showing the full atom numbering scheme. All displacement ellipsoids are at the 50 % probability level, and H atoms are omitted for clarity. Both orientations of the disordered  $\text{BF}_4^-$  ion are shown. Atom C(43) is obscured behind C(14).

Colour code: C, white; B, pink; F, cyan; Fe, green; N, blue.

Atoms C(63)-N(65) comprise a half-molecule of acetonitrile, which spans a crystallographic inversion centre.

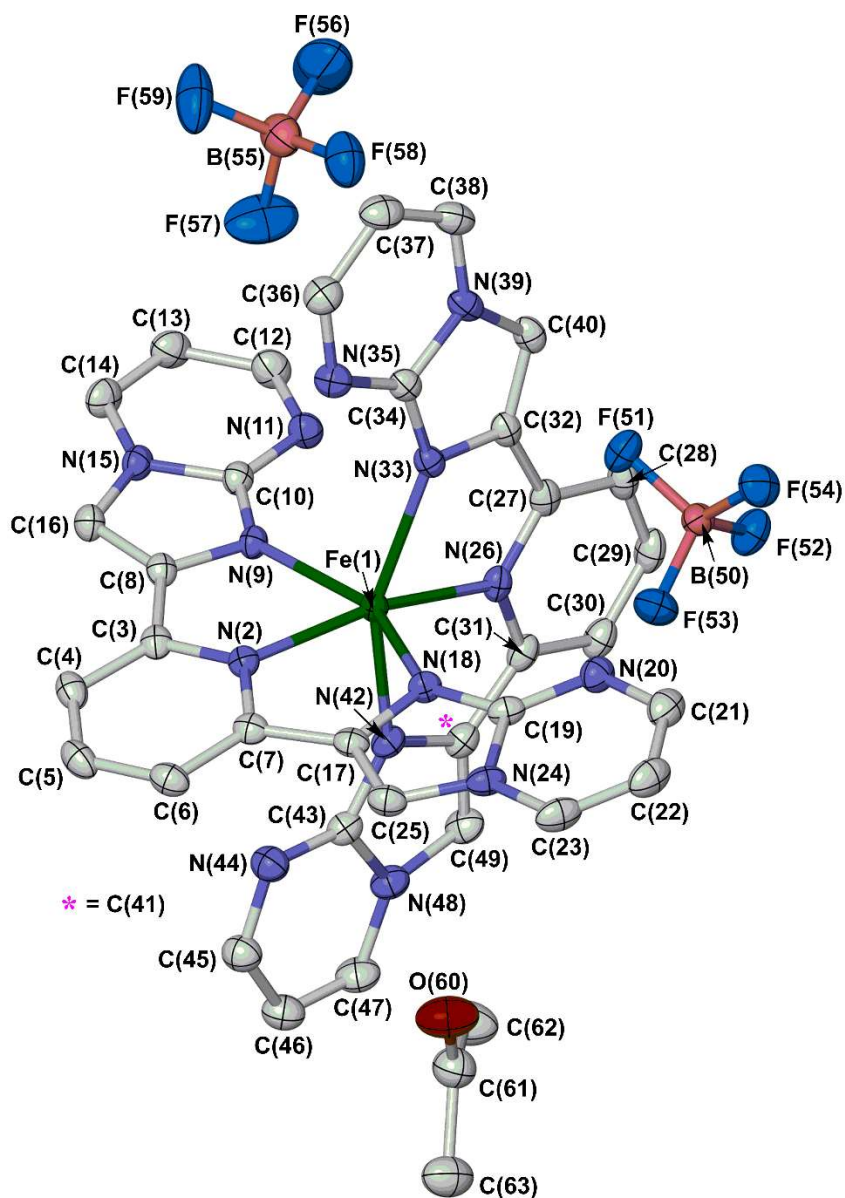

**Figure S18** The asymmetric unit of  $2[\text{BF}_4]_2 \cdot \text{Me}_2\text{CO}$ , showing the full atom numbering scheme. All displacement ellipsoids are at the 50 % probability level, and H atoms are omitted for clarity.

Colour code: C, white; B, pink; F, cyan; Fe, green; N, blue; O, red.

This structure is isomorphous with  $2[\text{BF}_4]_2 \cdot 1.5\text{MeCN}$  (Figure S17), but lacks the additional solvent half-molecule disordered about the crystallographic inversion centre in that crystal.

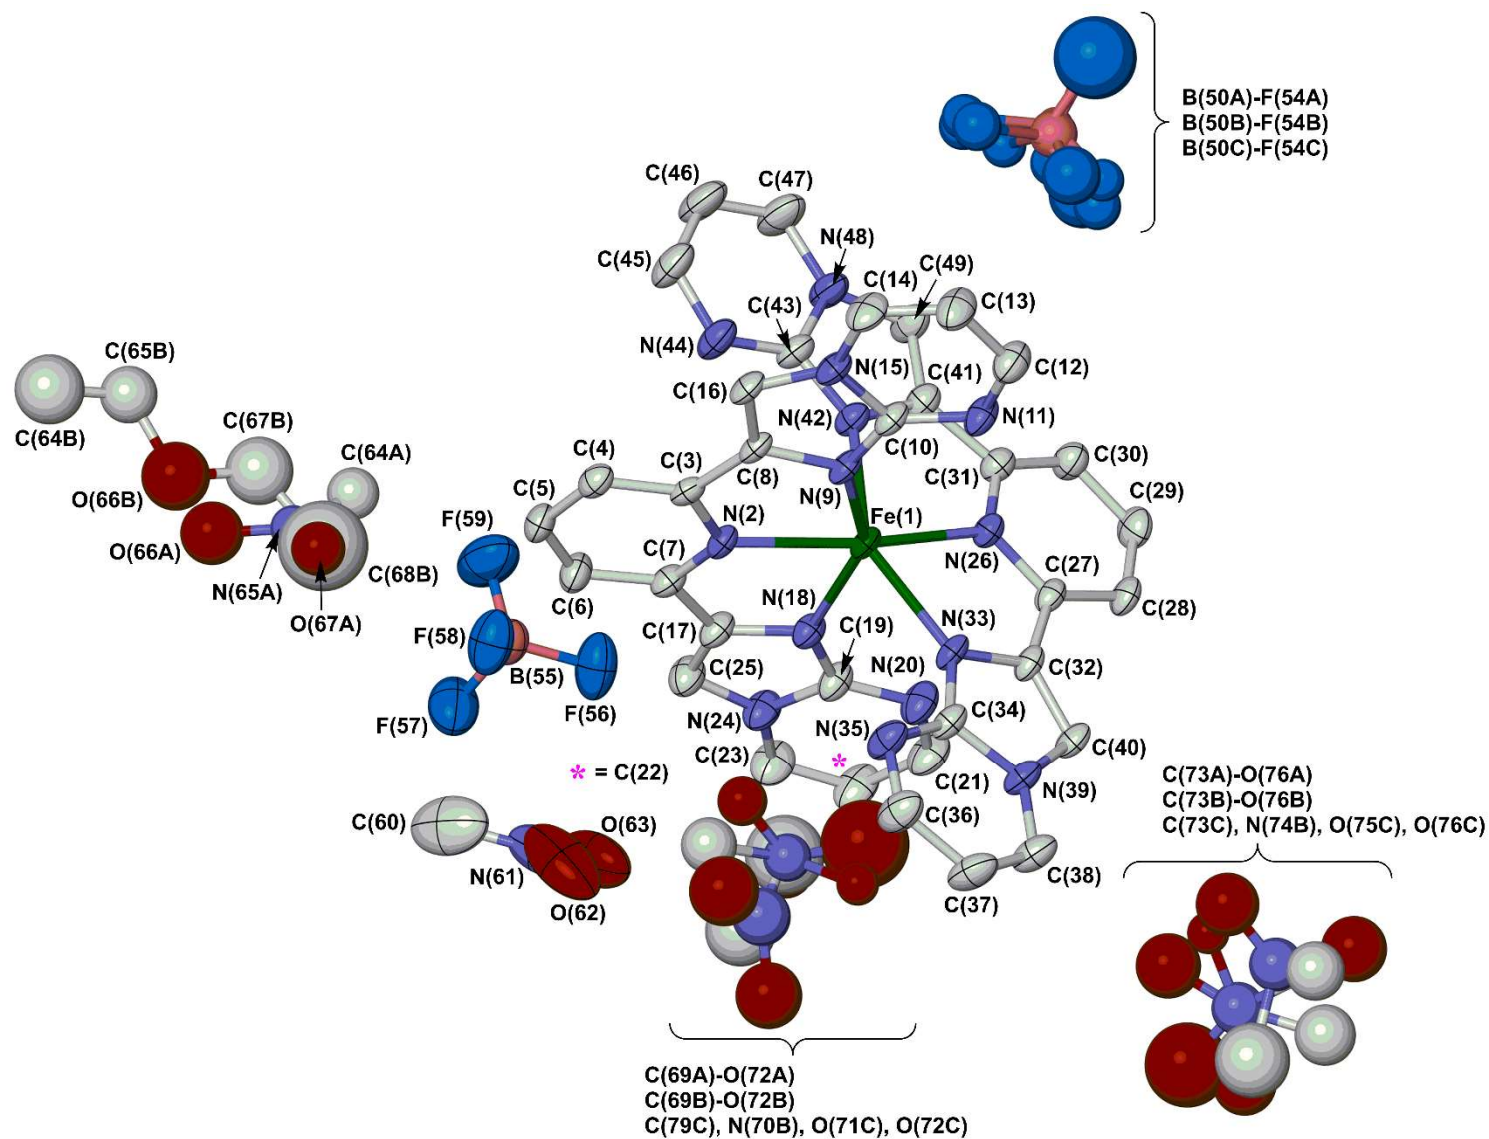

**Figure S19** The asymmetric unit of  $2[\text{BF}_4]_2 \cdot 3.5\text{MeNO}_2 \cdot 0.5\text{Et}_2\text{O}$ , showing the full atom numbering scheme. All displacement ellipsoids are at the 50 % probability level, and H atoms are omitted for clarity.

Colour code: C, white; B, pink; F, cyan; Fe, green; N, blue; O, red.

**Table S4** Selected bond lengths and angles in the solvate crystals of  $2[\text{BF}_4]_2$  ( $\text{\AA}$ ,  $^\circ$ ,  $\text{\AA}^3$ ). See Figures S17-S19 for the atom numbering scheme employed, and page S13 for definitions of the structural indices in the Table.

|                   | $2[\text{BF}_4]_2 \cdot 1.5\text{MeCN}$ | $2[\text{BF}_4]_2 \cdot \text{Me}_2\text{CO}$ | $2[\text{BF}_4]_2 \cdot 3.5\text{MeNO}_2 \cdot 0.5\text{Et}_2\text{O}$ |
|-------------------|-----------------------------------------|-----------------------------------------------|------------------------------------------------------------------------|
| Fe(1)–N(2)        | 2.148(2)                                | 2.1499(16)                                    | 2.160(3)                                                               |
| Fe(1)–N(9)        | 2.193(2)                                | 2.2076(17)                                    | 2.209(3)                                                               |
| Fe(1)–N(18)       | 2.183(2)                                | 2.1859(17)                                    | 2.203(3)                                                               |
| Fe(1)–N(26)       | 2.154(2)                                | 2.1538(16)                                    | 2.162(3)                                                               |
| Fe(1)–N(33)       | 2.197(2)                                | 2.1849(18)                                    | 2.196(3)                                                               |
| Fe(1)–N(42)       | 2.201(2)                                | 2.1994(18)                                    | 2.212(3)                                                               |
| N(2)–Fe(1)–N(9)   | 74.78(9)                                | 74.45(6)                                      | 74.54(12)                                                              |
| N(2)–Fe(1)–N(18)  | 74.57(9)                                | 75.13(6)                                      | 74.36(12)                                                              |
| N(2)–Fe(1)–N(26)  | 163.52(9)                               | 164.72(7)                                     | 156.26(12)                                                             |
| N(2)–Fe(1)–N(33)  | 120.61(9)                               | 119.88(6)                                     | 122.64(13)                                                             |
| N(2)–Fe(1)–N(42)  | 90.12(9)                                | 91.00(7)                                      | 89.15(12)                                                              |
| N(9)–Fe(1)–N(18)  | 148.43(9)                               | 148.92(6)                                     | 148.29(13)                                                             |
| N(9)–Fe(1)–N(26)  | 110.48(9)                               | 108.55(6)                                     | 121.03(13)                                                             |
| N(9)–Fe(1)–N(33)  | 98.12(9)                                | 98.68(6)                                      | 100.68(12)                                                             |
| N(9)–Fe(1)–N(42)  | 91.67(9)                                | 89.59(6)                                      | 91.12(12)                                                              |
| N(18)–Fe(1)–N(26) | 101.07(9)                               | 102.48(6)                                     | 90.43(13)                                                              |
| N(18)–Fe(1)–N(33) | 90.99(9)                                | 90.93(6)                                      | 90.88(12)                                                              |
| N(18)–Fe(1)–N(42) | 95.79(9)                                | 97.19(6)                                      | 94.47(13)                                                              |
| N(26)–Fe(1)–N(33) | 74.86(9)                                | 74.95(7)                                      | 74.69(12)                                                              |
| N(26)–Fe(1)–N(42) | 74.35(9)                                | 74.20(7)                                      | 73.69(12)                                                              |
| N(33)–Fe(1)–N(42) | 149.19(9)                               | 149.11(6)                                     | 147.95(13)                                                             |
| $V_{\text{Oh}}$   | 12.536(10)                              | 12.586(6)                                     | 12.430(12)                                                             |
| $\Sigma$          | 140.3(3)                                | 140.4(2)                                      | 144.8(4)                                                               |
| $\varnothing$     | 467                                     | 463                                           | 482                                                                    |
| $\phi$            | 163.52(9)                               | 164.72(7)                                     | 156.26(12)                                                             |
| $\theta$          | 87.59(3)                                | 84.65(1)                                      | 88.37(2)                                                               |

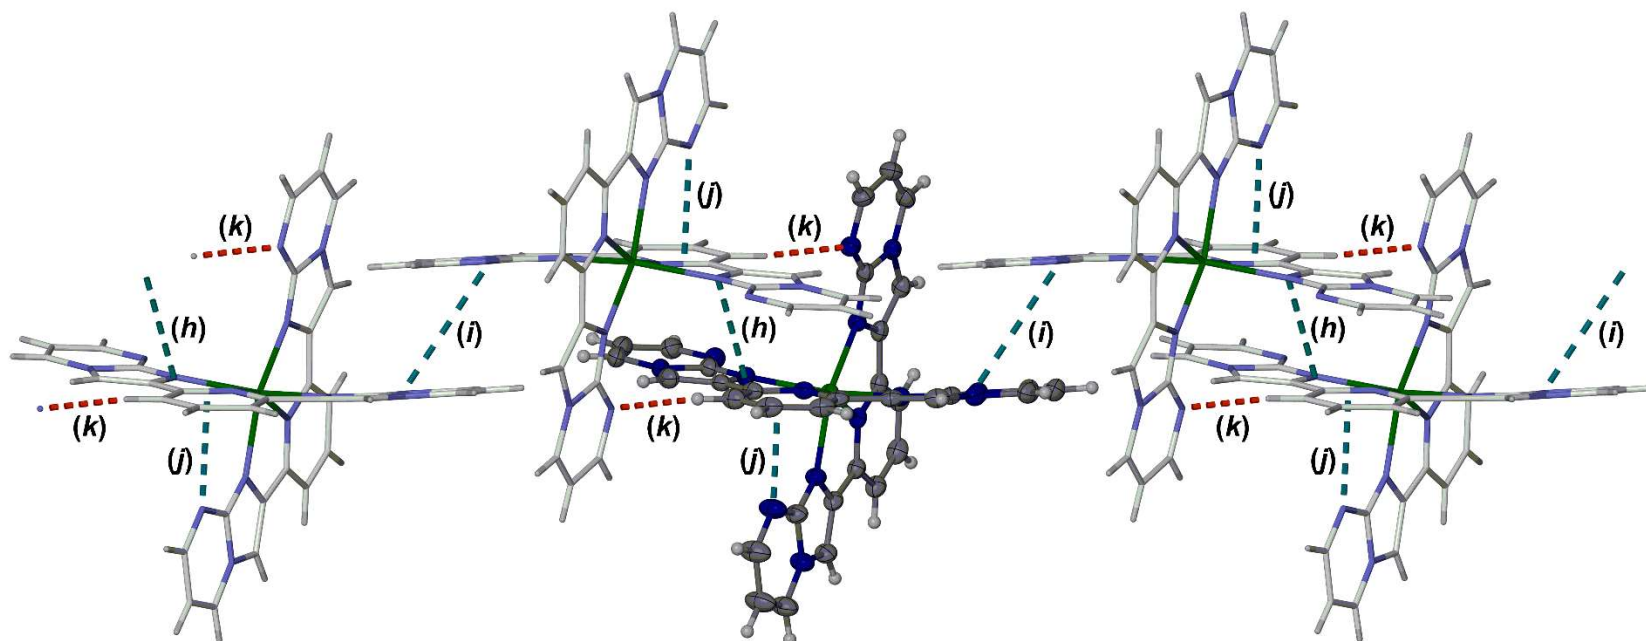

**Figure S20** Partial packing diagram of  $2[\text{BF}_4]_2 \cdot 1.5\text{MeCN}$ , showing the  $\pi \cdots \pi$  (cyan) and  $\text{C-H} \cdots \text{N}$  (red) intermolecular contacts between the cations. Each interaction is labelled with a code corresponding to that in Table S5. One cation is highlighted with dark colouration, while the anions and solvent molecules are not shown. Intramolecular  $\text{N} \cdots \pi$  interactions in these molecules are also omitted (Figure 2, main article).

Colour code: C, white or dark grey; H, pale grey; Fe, green; N, pale or dark blue.

The solvate  $2[\text{BF}_4]_2 \cdot \text{Me}_2\text{CO}$  is isomorphous with this structure, and shows the same pattern of intermolecular contacts.



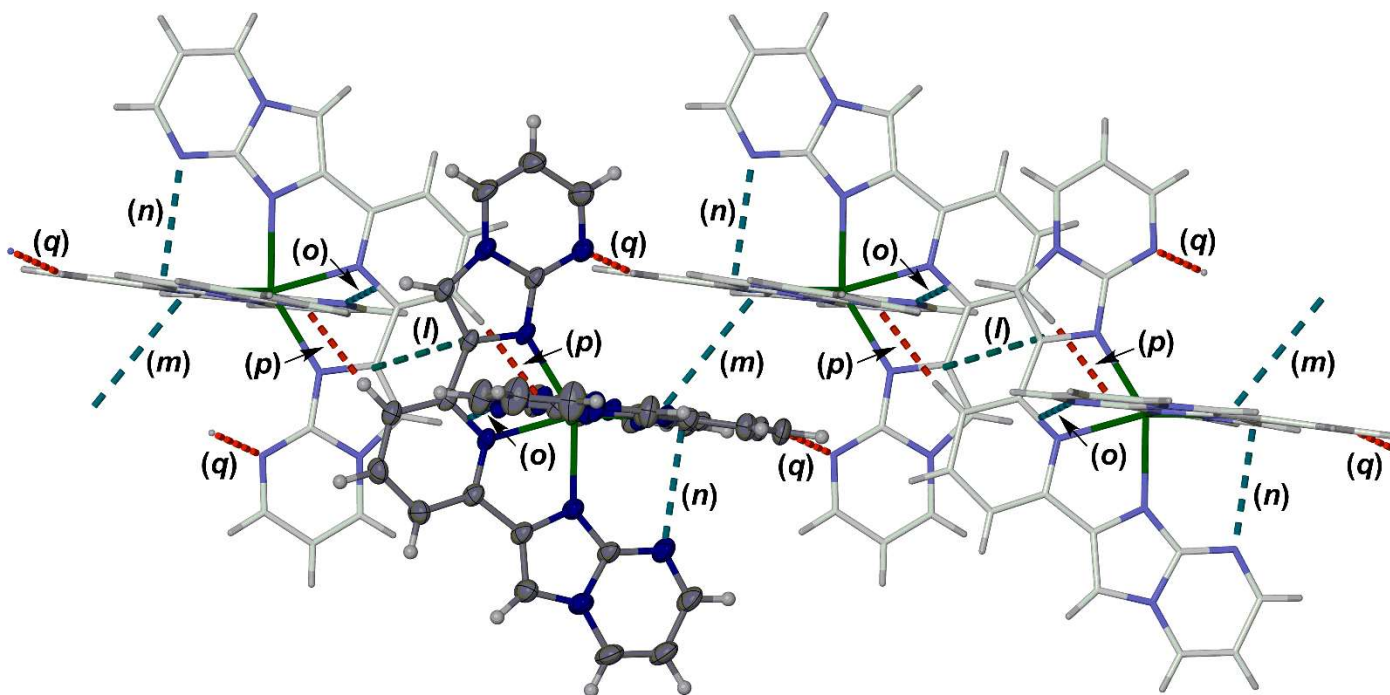

**Figure S21** Partial packing diagram of  $2[\text{BF}_4]_2 \cdot 3.5\text{MeNO}_2 \cdot 0.5\text{Et}_2\text{O}$ , showing the  $\pi \cdots \pi$  (cyan) and  $\text{C-H} \cdots \text{N}$  (red) intermolecular contacts between the cations. Each interaction is labelled with a code corresponding to that in Table S5. Other details as for Figure S21.

Colour code: C, white or dark grey; H, pale grey; Fe, green; N, pale or dark blue.

**Table S5** Secondary intra- and intermolecular interactions in the solvate crystals of **2[BF<sub>4</sub>]<sub>2</sub>** (Å, °). See Figures S17-S19 for the atom numbering scheme employed, while the codes for each interaction are those in Figures S20-S21. Symmetry codes: (v) 1-x, 1-y, 1-z; (x) 2-x, 2-y, 2-z; (xi) 1-x, 1-y, 2-z; (xii) 1-x, 2-y, 2-z.

| Intermolecular $\pi \cdots \pi$                                                                                                    | Dihedral angle | Interplanar spacing | Horizontal offset |                |
|------------------------------------------------------------------------------------------------------------------------------------|----------------|---------------------|-------------------|----------------|
| <b>2[BF<sub>4</sub>]<sub>2</sub>·1.5MeCN:</b>                                                                                      |                |                     |                   |                |
| [N(2)-C(10),N(15),C(16)] $\cdots$<br>[N(2 <sup>v</sup> )-C(10 <sup>v</sup> ),N(15 <sup>v</sup> ),C(16 <sup>v</sup> )] ( <b>h</b> ) | 0              | 3.255(9)            | 1.24              |                |
| [C(17)-C(25)] $\cdots$ [C(17 <sup>x</sup> )-C(25 <sup>x</sup> )] ( <b>i</b> )                                                      | 0              | 3.369(15)           | 2.46              |                |
| <b>2[BF<sub>4</sub>]<sub>2</sub>·Me<sub>2</sub>CO:</b>                                                                             |                |                     |                   |                |
| [N(2)-C(10),N(15),C(16)] $\cdots$<br>[N(2 <sup>v</sup> )-C(10 <sup>v</sup> ),N(15 <sup>v</sup> ),C(16 <sup>v</sup> )] ( <b>h</b> ) | 0              | 3.239(6)            | 1.20              |                |
| [C(17)-C(25)] $\cdots$ [C(17 <sup>x</sup> )-C(25 <sup>x</sup> )] ( <b>i</b> )                                                      | 0              | 3.449(11)           | 2.37              |                |
| <b>2[BF<sub>4</sub>]<sub>2</sub>·3.5MeNO<sub>2</sub>·0.5Et<sub>2</sub>O:</b>                                                       |                |                     |                   |                |
| [N(2)-C(16)] $\cdots$ [N(2 <sup>xi</sup> )-C(16 <sup>xi</sup> )] ( <b>l</b> )                                                      | 0              | 3.388(16)           | 2.08              |                |
| [N(26)-C(40)] $\cdots$ [N(26 <sup>xii</sup> )-C(40 <sup>xii</sup> )] ( <b>m</b> )                                                  | 0              | 3.32(3)             | 2.07              |                |
| Intramolecular N $\cdots\pi^a$                                                                                                     | N $\cdots$ X   |                     |                   |                |
| <b>2[BF<sub>4</sub>]<sub>2</sub>·1.5MeCN:</b>                                                                                      |                |                     |                   |                |
| N(44) $\cdots$ [N(2)-C(3)] ( <b>j</b> )                                                                                            | 3.059          |                     |                   |                |
| <b>2[BF<sub>4</sub>]<sub>2</sub>·Me<sub>2</sub>CO:</b>                                                                             |                |                     |                   |                |
| N(44) $\cdots$ [N(2)-C(3)] ( <b>j</b> )                                                                                            | 3.067          |                     |                   |                |
| <b>2[BF<sub>4</sub>]<sub>2</sub>·3.5MeNO<sub>2</sub>·0.5Et<sub>2</sub>O:</b>                                                       |                |                     |                   |                |
| N(20) $\cdots$ [N(26)-C(27)] ( <b>n</b> )                                                                                          | 3.145          |                     |                   |                |
| N(44) $\cdots$ [N(2)-C(3)] ( <b>o</b> )                                                                                            | 3.066          |                     |                   |                |
| Intermolecular C-H $\cdots$ N <sup>b</sup>                                                                                         | C-H            | H $\cdots$ N        | C $\cdots$ N      | C-H $\cdots$ N |
| <b>2[BF<sub>4</sub>]<sub>2</sub>·1.5MeCN:</b>                                                                                      |                |                     |                   |                |
| C(4)-H(4) $\cdots$ N(35 <sup>v</sup> ) ( <b>k</b> )                                                                                | 0.95           | 2.40                | 3.335(4)          | 167.3          |
| <b>2[BF<sub>4</sub>]<sub>2</sub>·Me<sub>2</sub>CO:</b>                                                                             |                |                     |                   |                |
| C(4)-H(4) $\cdots$ N(35 <sup>v</sup> ) ( <b>k</b> )                                                                                | 0.95           | 2.45                | 3.386(3)          | 170.0          |
| <b>2[BF<sub>4</sub>]<sub>2</sub>·3.5MeNO<sub>2</sub>·0.5Et<sub>2</sub>O:</b>                                                       |                |                     |                   |                |
| C(4)-H(4) $\cdots$ N(35 <sup>xi</sup> ) ( <b>p</b> )                                                                               | 0.95           | 2.47                | 3.408(5)          | 168.5          |
| C(28)-H(28) $\cdots$ N(11 <sup>xii</sup> ) ( <b>q</b> )                                                                            | 0.95           | 2.44                | 3.379(5)          | 169.4          |

<sup>a</sup>This is an intramolecular dipolar contact, between the lone pair of a peripheral N atom of one ligand and the centroid of a pyridyl C-N bond on the other. The sum of the Pauling van der Waals radii of an N atom and an aromatic ring is 3.1 Å.<sup>17</sup> <sup>b</sup>The sum of the Pauling van der Waals radii of an H atom and an N atom is 2.6 Å.<sup>18</sup>

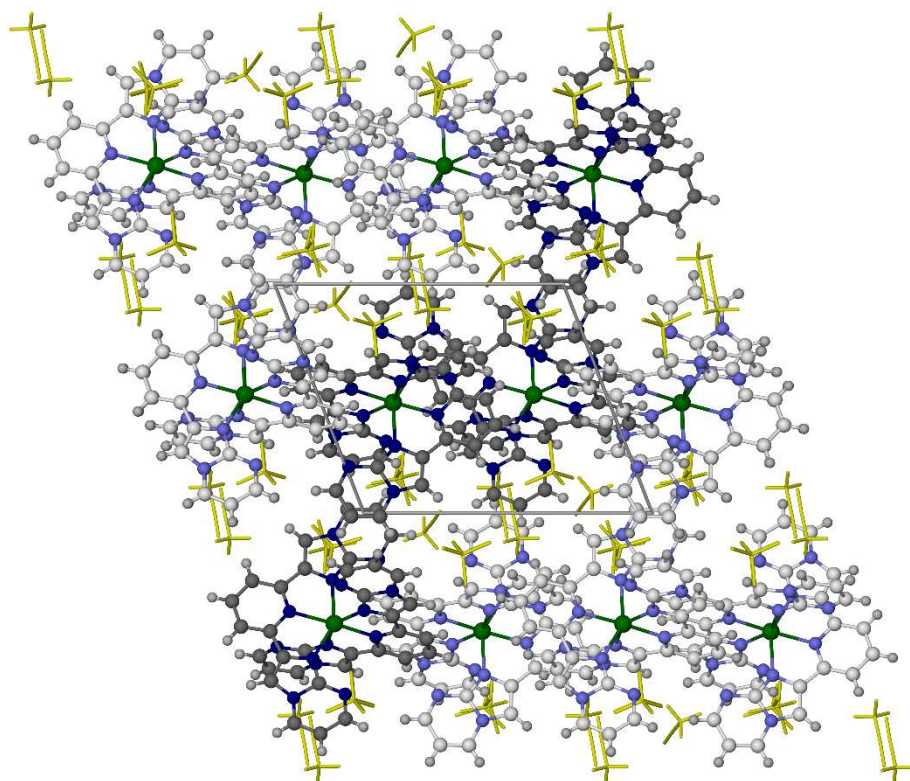

**Figure S22** Full packing diagram of  $2[\text{BF}_4]_2 \cdot 1.5\text{MeCN}$ . The view is parallel to the  $[010]$  crystal vector, with the unit cell  $c$  axis horizontal. One cation chain (Figure S20) is highlighted with dark colouration, while the anions and solvent molecules are de-emphasised for clarity. Both orientations are shown for the MeCN half-molecule disordered about the crystallographic inversion centre.

Colour code: C, white or dark grey; H, pale grey; Fe, green; N, pale or dark blue;  $\text{BF}_4^-$  and MeCN, yellow.

The complex cations associate into zig-zag chains along the  $[111]$  direction, through intermolecular  $\pi \cdots \pi$  interactions and  $\text{C-H} \cdots \text{N}$  contacts (Figure S20, Table S5).

$2[\text{BF}_4]_2 \cdot \text{Me}_2\text{CO}$  is isomorphous with this structure and exhibits the same crystal packing motif. However, the pair of solvent half-molecules spanning inversion centres in this Figure, is missing in the acetone solvate.

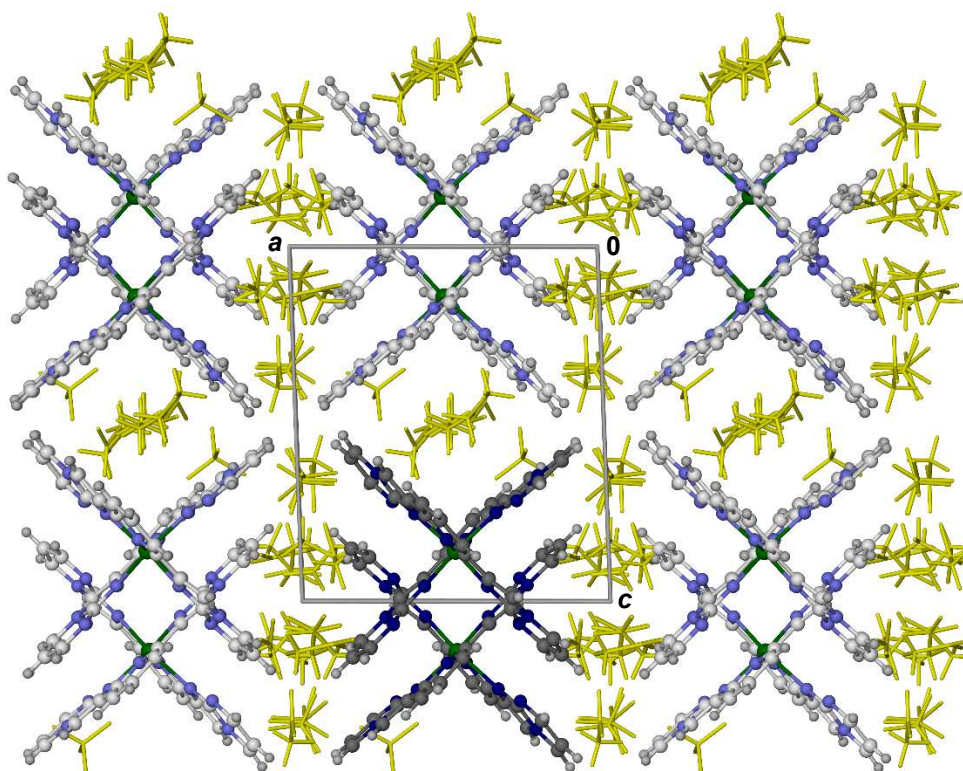

**Figure S23** Full packing diagram of  $2[\text{BF}_4]_2 \cdot 3.5\text{MeNO}_2 \cdot 0.5\text{Et}_2\text{O}$ , viewed parallel to the  $[010]$  crystal vector. One  $\pi$ -stacked cation chain (Figure S21) is highlighted with dark colouration, while the anions and solvent molecules are de-emphasised for clarity.

Colour code: C, white or dark grey; H, pale grey; Fe, green; N, pale or dark blue;  $\text{BF}_4^-$  and MeCN, yellow.

The complex cations associate into zig-zag chains along the unit cell  $b$  axis, through intermolecular  $\pi \cdots \pi$  interactions and  $\text{C-H} \cdots \text{N}$  contacts (Figure S21, Table S5).

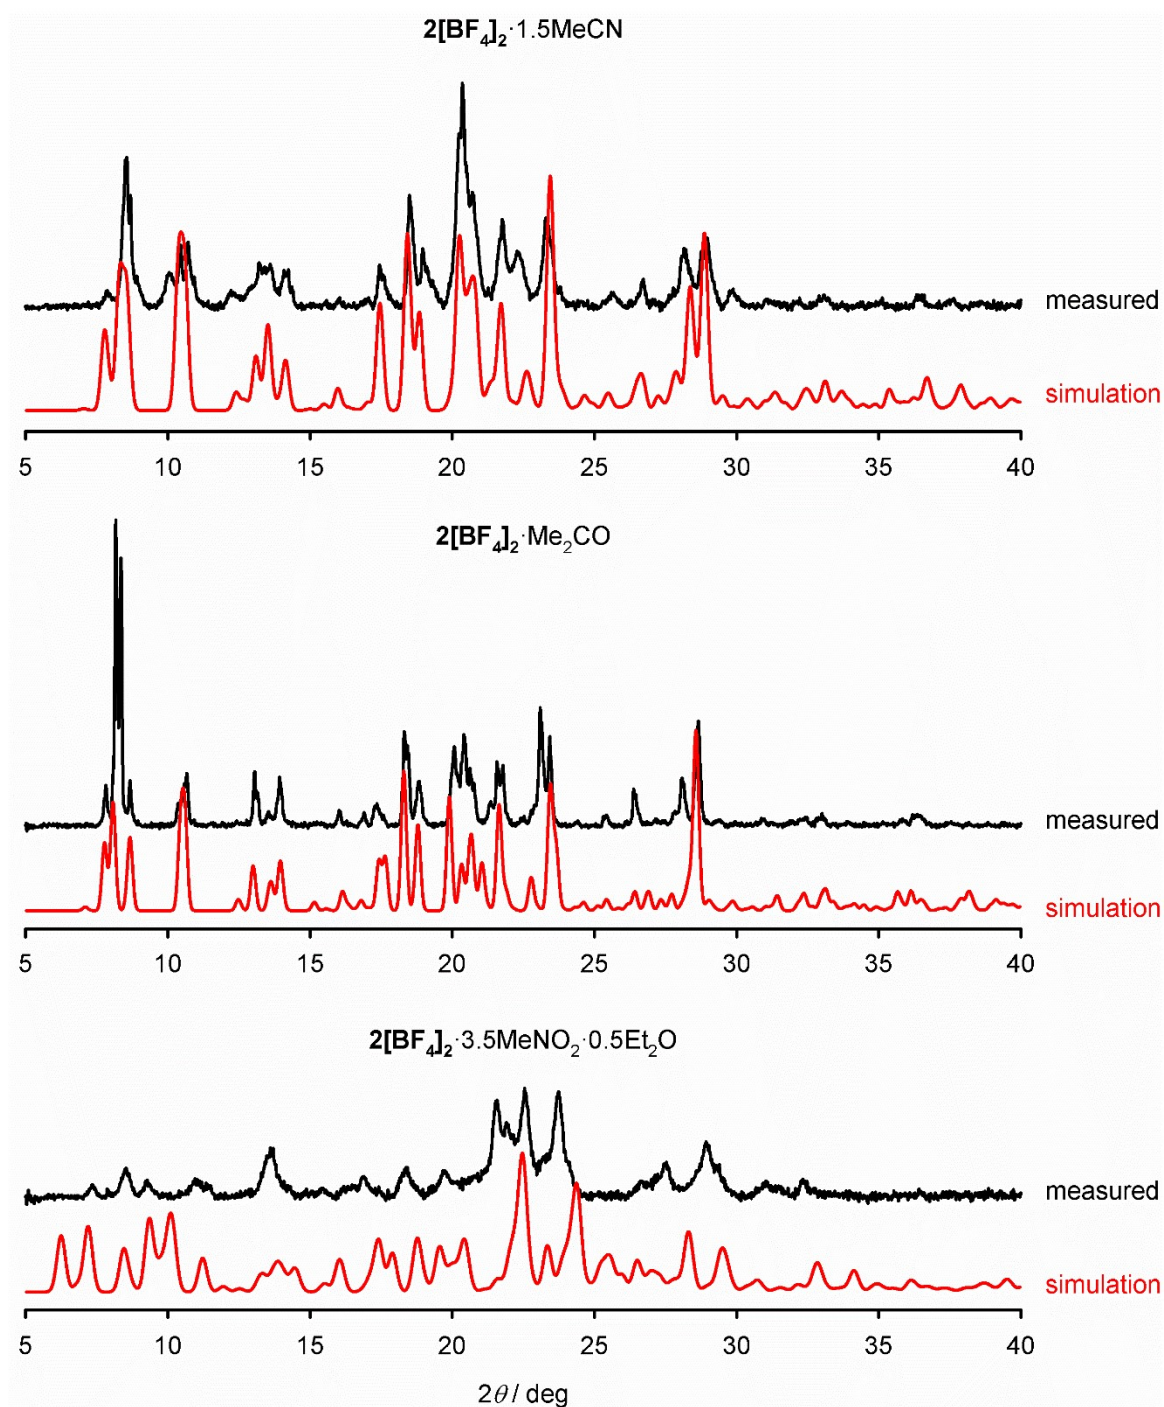

**Figure S24** Experimental X-ray powder diffraction data for the crystallographically characterised solvates of  $2[\text{BF}_4]_2$  (black), and simulations based on their low temperature crystal structures (red).

The acetonitrile and acetone solvates retain good crystallinity upon exposure to air, with just small structural changes compared to the single crystal phases. However,  $2[\text{BF}_4]_2 \cdot 3.5\text{MeNO}_2 \cdot 0.5\text{Et}_2\text{O}$  collapses to a poorly crystalline powder showing significant structural differences from the parent solvate material.

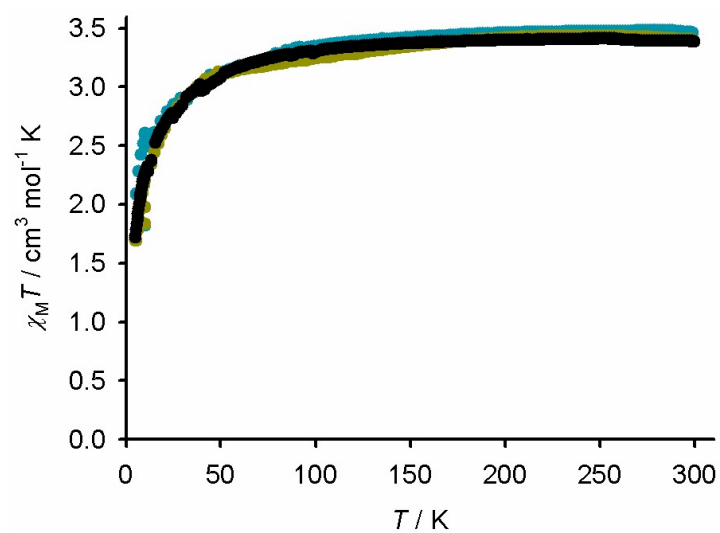

**Figure S25** Variable temperature magnetic susceptibility data from freshly crystallised  $[\text{Fe}(\text{L}^2)_2][\text{BF}_4]_2 \cdot \text{Me}_2\text{CO}$  (black),  $2[\text{BF}_4]_2 \cdot 1.5\text{MeCN}$  (yellow) and  $2[\text{BF}_4]_2 \cdot 3.5\text{MeNO}_2 \cdot 0.5\text{Et}_2\text{O}$  (cyan). The samples were protected against solvent loss during the measurement.

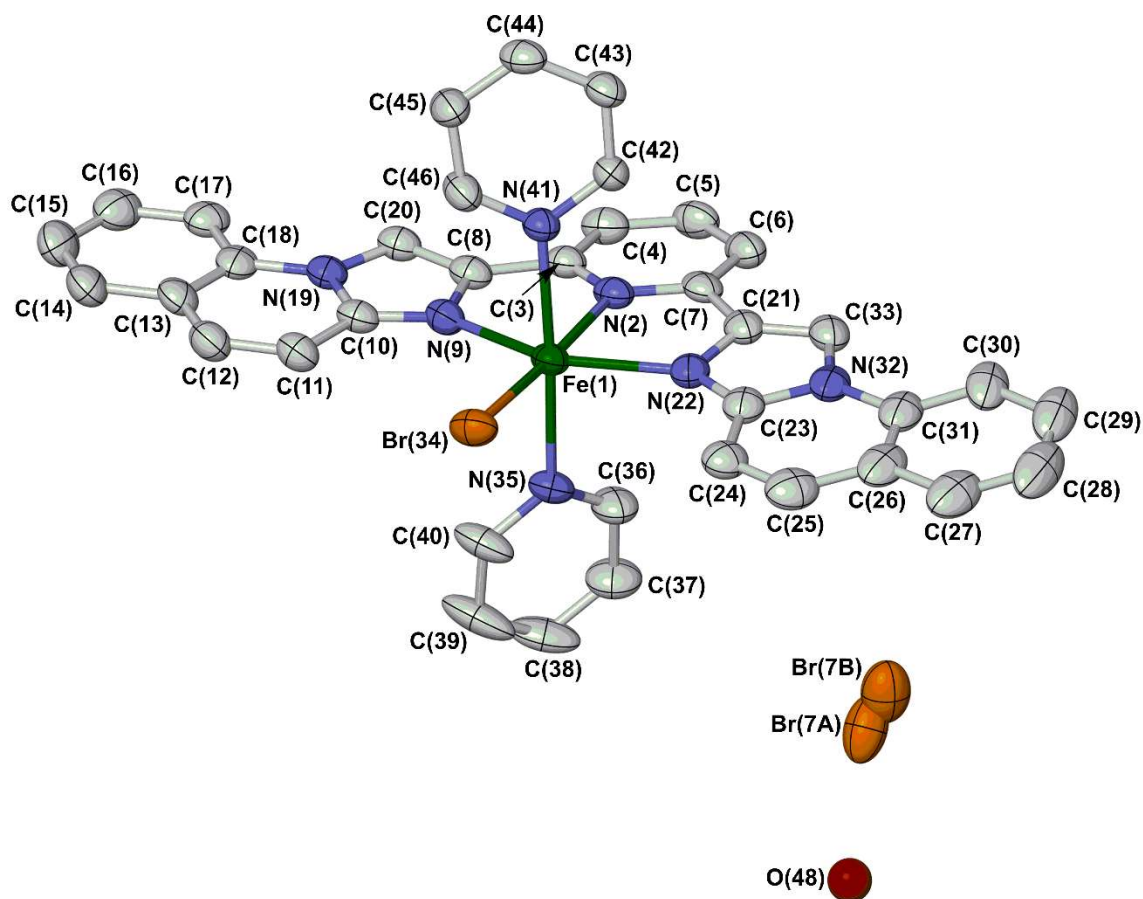

**Figure S26** The asymmetric unit of [FeBr(py)<sub>2</sub>(L<sup>3</sup>)]Br·0.5H<sub>2</sub>O, showing the full atom numbering scheme. All displacement ellipsoids are at the 50 % probability level, and H atoms are omitted for clarity. Both orientations of the disordered bromide ion are shown, while the partial water molecule O(48) is half-occupied.

Colour code: C, white; Br, orange; Fe, green; N, blue; O, red.

The disordered bromide ion and water half-molecule occupy the same cavity surrounding a crystallographic inversion centre. Although its H atoms were not located, the partial water site is positioned to hydrogen bond to Br(7B) and Br(7A<sup>i</sup>) [symmetry code: (i)  $-x, 1-y, 1-z$ ; O(48)···Br(7B) = 3.357(7) Å; O(48)···Br(7A<sup>i</sup>) = 3.286(7) Å; Br(7B)···O(48)···Br(7A<sup>i</sup>) = 101.50(19)°].

**Table S6** Selected bond lengths, angles and other metric parameters for  $[\text{FeBr}(\text{py})_2(\text{L}^3)]\text{Br}\cdot 0.5\text{H}_2\text{O}$  ( $\text{\AA}$ ,  $^\circ$ ,  $\text{\AA}^3$ ). See Figure S25 for the atom numbering scheme, while definitions of  $V_{\text{Oh}}$ ,  $\Sigma$  and  $\Theta$  are on page S13.

|                   |            |                    |            |
|-------------------|------------|--------------------|------------|
| Fe(1)–N(2)        | 2.176(4)   | Fe(1)–Br(34)       | 2.5079(8)  |
| Fe(1)–N(9)        | 2.175(4)   | Fe(1)–N(35)        | 2.252(4)   |
| Fe(1)–N(22)       | 2.165(4)   | Fe(1)–N(41)        | 2.260(3)   |
|                   |            |                    |            |
| N(2)–Fe(1)–N(9)   | 73.99(14)  | N(9)–Fe(1)–N(41)   | 87.00(13)  |
| N(2)–Fe(1)–N(22)  | 74.73(15)  | N(22)–Fe(1)–Br(34) | 106.49(11) |
| N(2)–Fe(1)–Br(34) | 176.85(9)  | N(22)–Fe(1)–N(35)  | 90.52(14)  |
| N(2)–Fe(1)–N(35)  | 90.54(14)  | N(22)–Fe(1)–N(41)  | 93.39(13)  |
| N(2)–Fe(1)–N(41)  | 86.18(13)  | Br(34)–Fe(1)–N(35) | 92.35(11)  |
| N(9)–Fe(1)–N(22)  | 148.61(15) | Br(34)–Fe(1)–N(41) | 90.83(10)  |
| N(9)–Fe(1)–Br(34) | 104.88(10) | N(35)–Fe(1)–N(41)  | 174.07(14) |
| N(9)–Fe(1)–N(35)  | 87.34(14)  |                    |            |
|                   |            |                    |            |
| $V_{\text{Oh}}$   | 14.692(15) | $\Sigma$           | 79.8(4)    |
|                   |            | $\Theta$           | 202        |

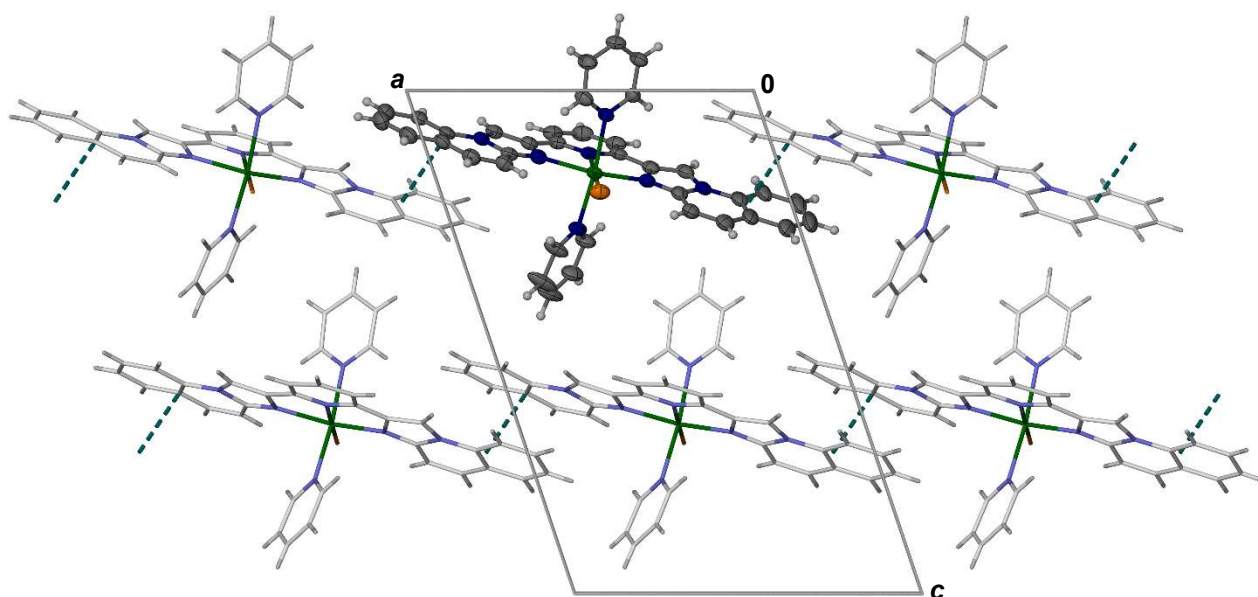

**Figure S27** Packing diagram of  $[\text{FeBr}(\text{py})_2(\text{L}^3)]\text{Br}\cdot 0.5\text{H}_2\text{O}$ , showing the association of the molecules into chains parallel to  $[100]$  through  $\pi \cdots \pi$  interactions between their  $\text{L}^3$  quinolyl residues (shown as dotted lines). One molecule is highlighted with dark colouration, while the other molecules are de-emphasised for clarity. The bromide anions and water half-molecules are not shown.

Colour code: C, white or dark grey; H, pale grey; Br, orange; Fe, green; N, pale or dark blue; O, red.

The dihedral angle between the least squares planes of the interacting quinolyl groups  $[\text{C}(10)\text{--N}(19)]$  and  $[\text{C}(23^{\text{xiii}})\text{--N}(32^{\text{xiii}})]$  is  $8.45(16)^\circ$ ; the average distance between the overlapping rings is  $3.520(18) \text{\AA}$ ; and their centroids are horizontally offset by  $1.13 \text{\AA}$  [symmetry code: (xiii)  $1+x, y, z$ ].



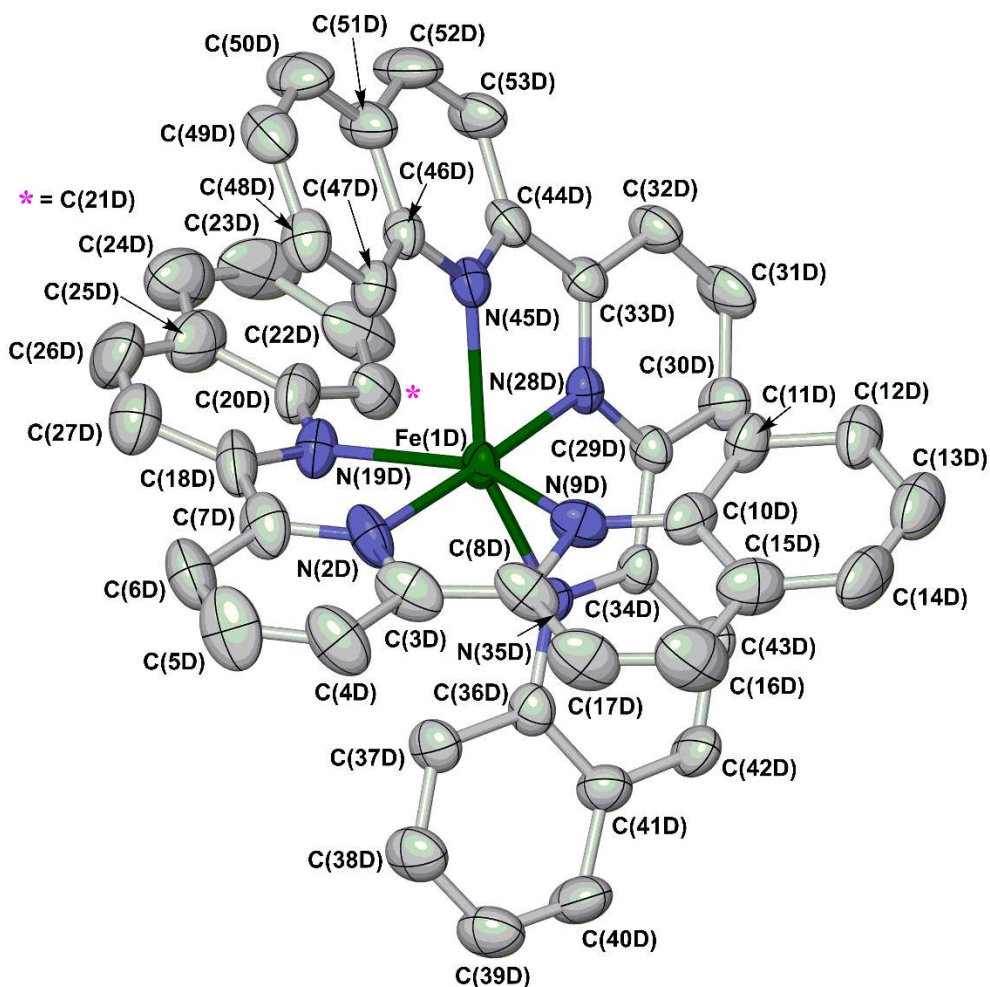

**Figure S28** Molecule D in the refinement of  $4[\text{BF}_4]_2 \cdot 1.39\text{MeCN} \cdot 0.125\text{Et}_2\text{O} \cdot 0.25\text{H}_2\text{O}$ , showing the full atom numbering scheme. All displacement ellipsoids are at the 50 % probability level, and H atoms are omitted for clarity.

Colour code: C, white; Fe, green; N, blue.

Molecule D is shown here as the least distorted cation in the asymmetric unit, which gives the clearest view. Molecules A-C in the model follow the same atom numbering scheme as shown here, with 'A', 'B' or 'C' suffixes on the atom labels as appropriate (Figure S28).

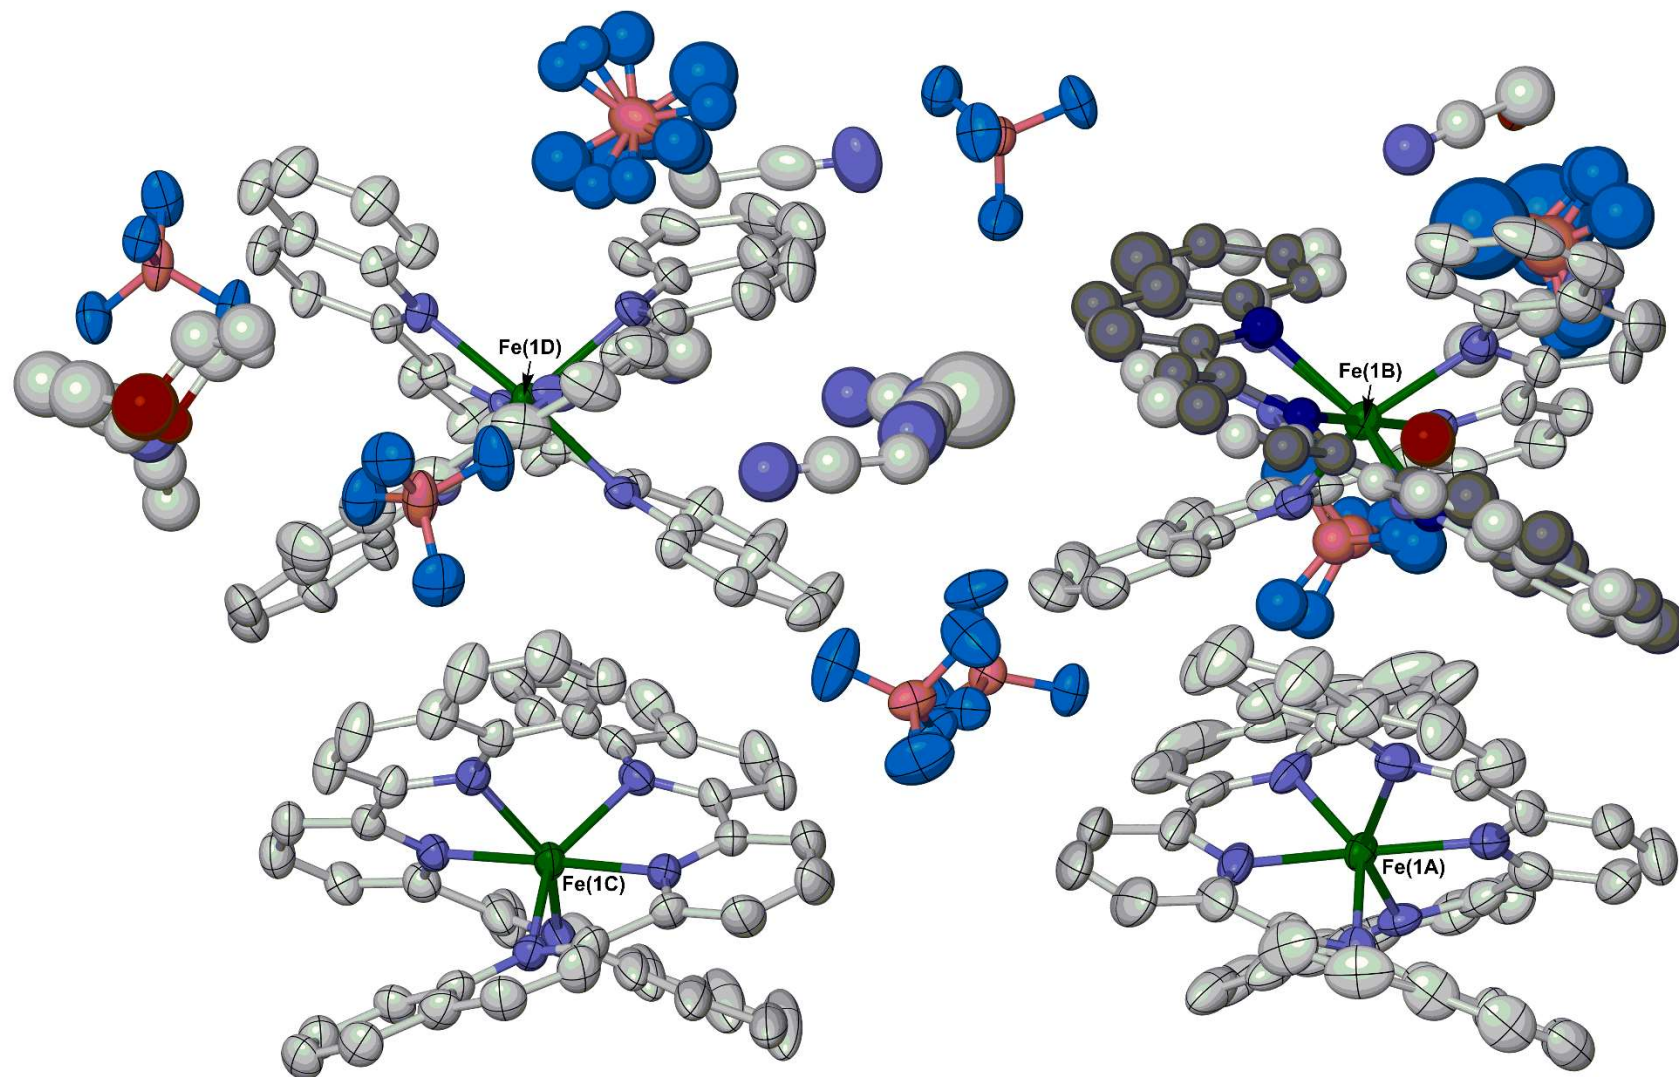

**Figure S29** The asymmetric unit of  $4[\text{BF}_4]_2 \cdot 1.39\text{MeCN} \cdot 0.125\text{Et}_2\text{O} \cdot 0.25\text{H}_2\text{O}$ . The iron atoms in molecules A, B, C and D are labelled in the Figure; the other atoms labels in the complex molecules follow the scheme in Figure S27. The two ligand disorder orientations bound to Fe(1B) are distinguished by pale and dark colouration. All displacement ellipsoids are at the 50 % probability level, and H atoms are omitted for clarity.

Colour code: C, white or dark gray; B, pink; F, cyan; Fe, green; N, pale or dark blue; O, red.

**Table S7** Selected bond lengths and angles in **4[BF<sub>4</sub>]<sub>2</sub>·1.39MeCN·0.125Et<sub>2</sub>O·0.25H<sub>2</sub>O** (Å, °, Å<sup>3</sup>). See Figures S28-S29 for the atom numbering scheme employed, and page S13 for definitions of the structural indices in the Table.

|                        | molecule A | molecule B <sup>a</sup> | molecule C | molecule D |
|------------------------|------------|-------------------------|------------|------------|
| Fe(1)–N(2)             | 2.073(6)   | 2.100(5)                | 2.088(5)   | 2.114(5)   |
| Fe(1)–N(9)             | 2.234(5)   | 2.271(5)                | 2.252(5)   | 2.249(5)   |
| Fe(1)–N(19)            | 2.319(6)   | 2.299(5)                | 2.280(5)   | 2.252(5)   |
| Fe(1)–N(28)            | 2.102(6)   | 2.148(9)/2.049(15)      | 2.088(5)   | 2.099(4)   |
| Fe(1)–N(35)            | 2.315(5)   | 2.287(9)/2.235(10)      | 2.298(6)   | 2.252(5)   |
| Fe(1)–N(45)            | 2.221(5)   | 2.252(9)/2.335(8)       | 2.265(5)   | 2.286(5)   |
| N(2)–Fe(1)–N(9)        | 76.2(2)    | 73.44(19)               | 74.58(19)  | 73.4(2)    |
| N(2)–Fe(1)–N(19)       | 72.5(2)    | 73.08(19)               | 73.71(19)  | 74.6(2)    |
| N(2)–Fe(1)–N(28)       | 164.9(2)   | 173.6(3)/173.1(5)       | 177.8(2)   | 177.6(2)   |
| N(2)–Fe(1)–N(35)       | 95.2(2)    | 103.3(3)/109.5(3)       | 106.8(2)   | 106.9(2)   |
| N(2)–Fe(1)–N(45)       | 117.6(2)   | 112.9(3)/101.2(3)       | 105.0(2)   | 104.8(2)   |
| N(9)–Fe(1)–N(19)       | 148.0(2)   | 146.53(19)              | 148.29(18) | 147.99(19) |
| N(9)–Fe(1)–N(28)       | 115.8(2)   | 111.5(3)/101.8(5)       | 107.60(19) | 108.75(18) |
| N(9)–Fe(1)–N(35)       | 107.15(18) | 109.8(3)/105.1(3)       | 81.06(19)  | 88.89(18)  |
| N(9)–Fe(1)–N(45)       | 83.46(19)  | 84.2(3)/80.4(3)         | 106.42(18) | 101.61(18) |
| N(19)–Fe(1)–N(28)      | 96.2(2)    | 101.9(3)/111.5(5)       | 104.11(18) | 103.25(18) |
| N(19)–Fe(1)–N(35)      | 82.62(19)  | 78.3(3)/86.2(3)         | 107.5(2)   | 100.14(18) |
| N(19)–Fe(1)–N(45)      | 104.96(19) | 108.7(3)/106.0(3)       | 82.60(18)  | 86.72(18)  |
| N(28)–Fe(1)–N(35)      | 73.1(2)    | 71.3(4)/76.3(5)         | 74.03(19)  | 74.34(17)  |
| N(28)–Fe(1)–N(45)      | 74.4(2)    | 72.3(4)/72.8(5)         | 74.19(19)  | 73.94(17)  |
| N(35)–Fe(1)–N(45)      | 147.2(2)   | 143.6(4)/149.1(3)       | 148.13(19) | 148.28(16) |
| <i>V</i> <sub>Oh</sub> | 12.73(2)   | 12.85(3)/12.99(4)       | 12.94(2)   | 13.149(18) |
| <i>Σ</i>               | 174.6(7)   | 195.5(11)/172.9(13)     | 177.3(7)   | 153.6(7)   |
| <i>Θ</i>               | 486        | 529/482                 | 476        | 476        |
| <i>φ</i>               | 164.9(2)   | 173.6(3)/173.1(5)       | 177.8(2)   | 177.6(2)   |
| <i>θ</i>               | 57.75(5)   | 60.15(7)/61.04(9)       | 62.64(5)   | 73.38(4)   |

<sup>a</sup>Ligand N(28B)–C(53B) is disordered over two orientations, with a refined occupancy ratio of 0.61:0.39.

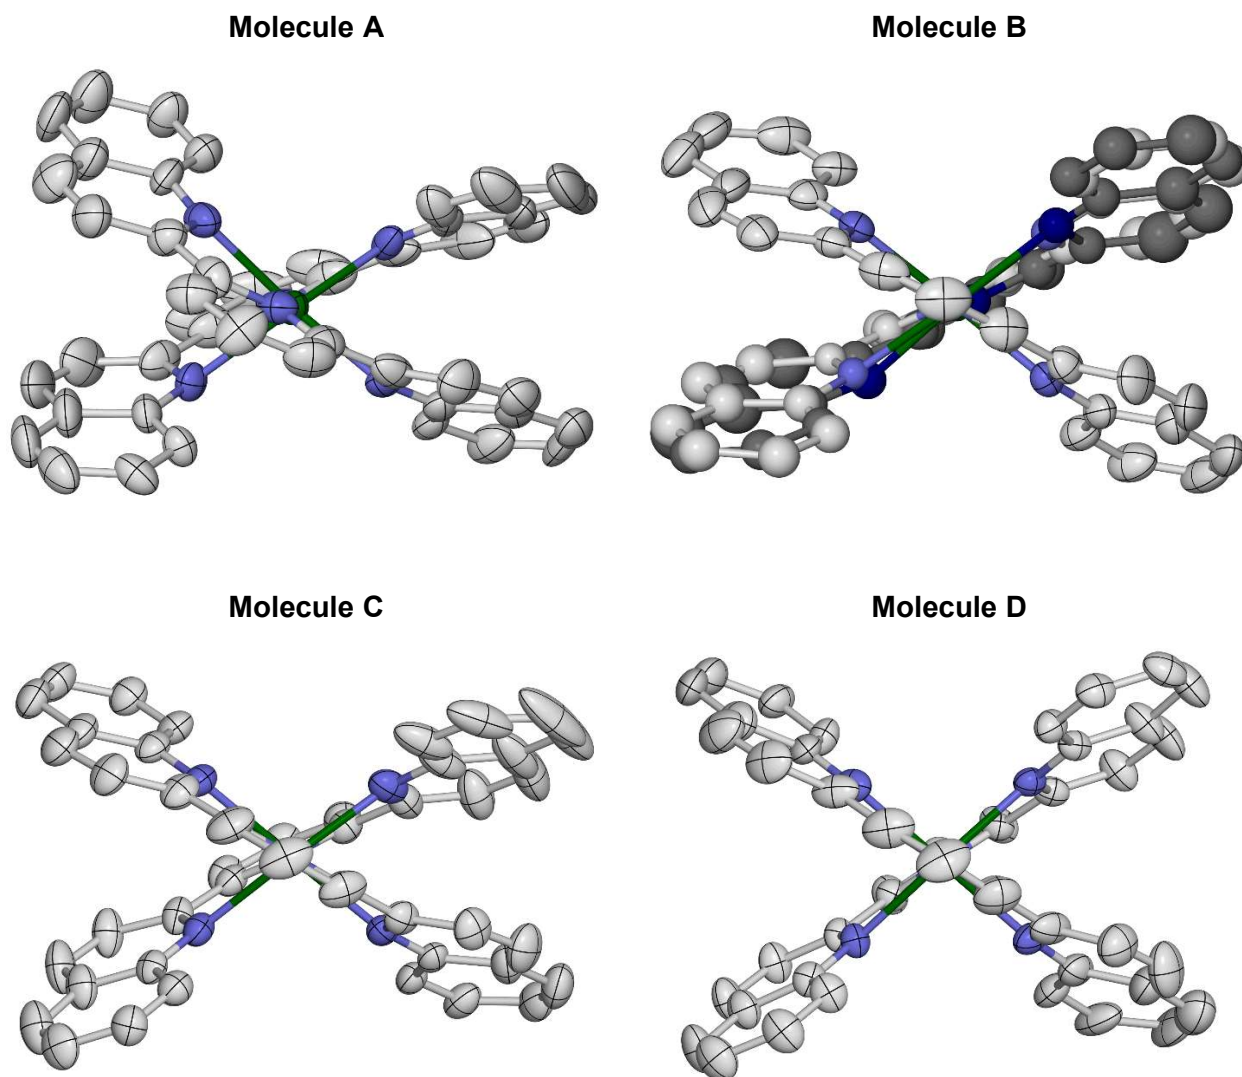

**Figure S30** The four unique complex molecules in  $4[\text{BF}_4]_2 \cdot 1.39\text{MeCN} \cdot 0.125\text{Et}_2\text{O} \cdot 0.25\text{H}_2\text{O}$ . The views are parallel to the  $\text{N}(2) \cdots \text{N}(28)$  vector in each molecule (Figure S28), which is chosen to highlight their helical ligand conformations. Other details as for Figure S29.

Molecules C and D are inverted in the Figure, so their handedness is the same as molecules A and B (the crystal adopts a centrosymmetric space group,  $P2_1/c$ ).

Colour code: C, white or dark gray; Fe, green; N, pale or dark blue.

The degree of helicity in the molecules runs as  $A > B \approx C > D$ , based on two criteria: the canting of the two  $\text{L}^4$  ligands away from the perpendicular ( $\theta$ , Table S6); and, the dihedral angle between overlapping pairs of quinolyl residues in each molecule (Table S7).

There are short interatomic contacts between overlapping quinolyl groups on the two ligands in each molecule, implying a degree of  $\pi \cdots \pi$  contact between them. Only in molecule A are these groups close enough, and coplanar enough, to be considered a traditional weak  $\pi \cdots \pi$  interaction however (Table S7).

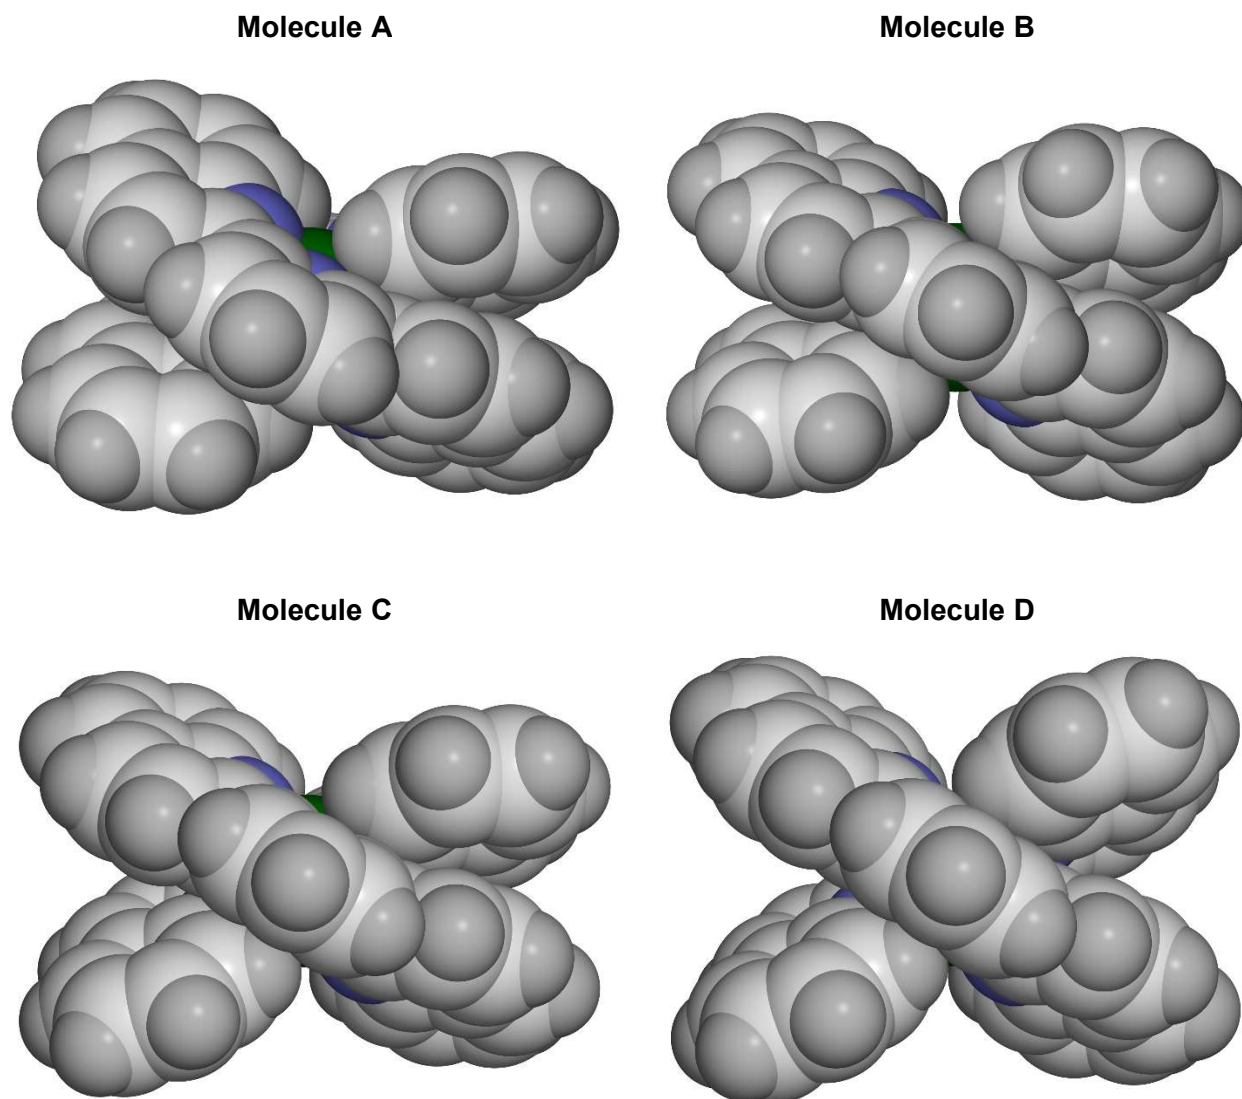

**Figure S31** Space-filling views of the four unique complex molecules in  $4[\text{BF}_4]_2 \cdot 1.39\text{MeCN} \cdot 0.125\text{Et}_2\text{O} \cdot 0.25\text{H}_2\text{O}$ . The views are the same as in Figure S30, parallel to the  $\text{N}(2) \cdots \text{N}(28)$  vector in each molecule. Only the major ligand disorder orientation for mol B is shown. Other details as for Figure S30.

Colour code: C, white; H, pale grey; Fe, green; N, blue.

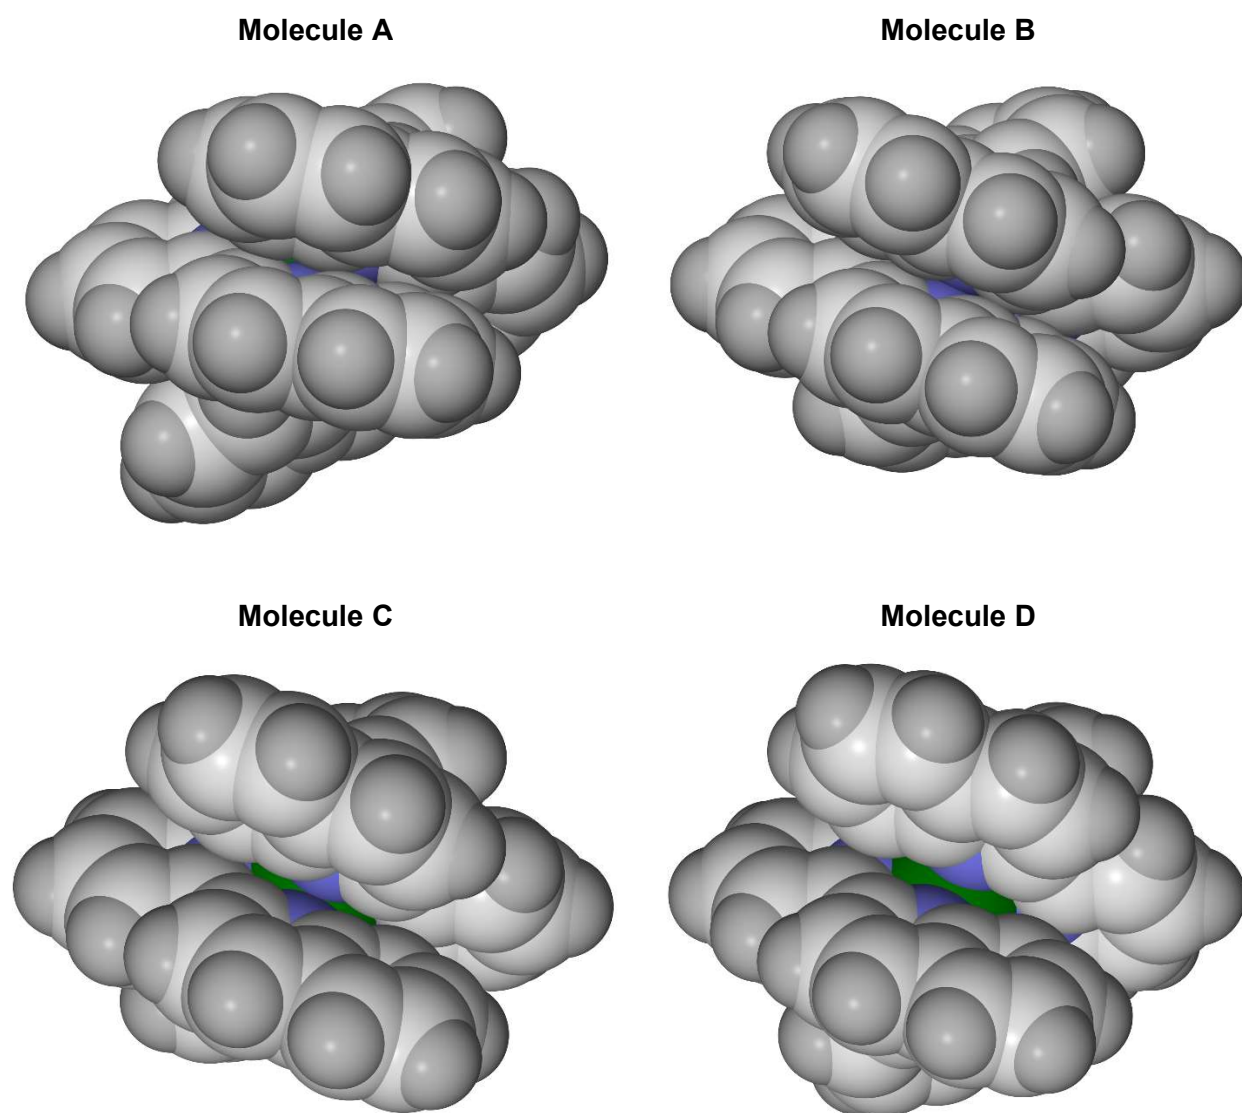

**Figure S32** Alternative space-filling views of the four unique complex molecules in  $4[\text{BF}_4]_2 \cdot 1.39\text{MeCN} \cdot 0.125\text{Et}_2\text{O} \cdot 0.25\text{H}_2\text{O}$ . The views are perpendicular to those in Figures S30 and S31, and emphasise the helical conformations of the molecules. Other details as for Figure S30.

Colour code: C, white; H, pale grey; Fe, green; N, blue.

**Table S8** Intramolecular contacts between overlapping quinolyl groups in the helical ligand conformation of **4[BF<sub>4</sub>]<sub>2</sub>·1.39MeCN·0.125Et<sub>2</sub>O·0.25H<sub>2</sub>O** (Å, °; Figures S31-S32). The Table lists the standard metric parameters for face-to-face  $\pi \cdots \pi$  interactions between overlapping quinolyl groups, with the most significant closest interatomic contacts between each pair of quinolyl rings.

| $\pi \cdots \pi$                                                                     | Dihedral angle  | Average inter-planar spacing | Horizontal offset | Shortest interatomic contacts                                                                       |                                                                                        |
|--------------------------------------------------------------------------------------|-----------------|------------------------------|-------------------|-----------------------------------------------------------------------------------------------------|----------------------------------------------------------------------------------------|
| [C(8A)-C(17A)] $\cdots$ [C(44A)-C(53A)]                                              | 19.7(2)         | 3.43(3)                      | 0.72              | C(8A) $\cdots$ C(47A)<br>N(9A) $\cdots$ C(46A)                                                      | 3.174(10)<br>3.239(8)                                                                  |
| [N(2A)-C(7A), C(18A)-C(27A)] $\cdots$<br>[N(28A)-C(33A), C(34A)-C(43A)] <sup>a</sup> | 28.85(18)       | 3.15(4)                      | 1.07              | N(2A) $\cdots$ C(37A)<br>C(18A) $\cdots$ C(36A)<br>N(19A) $\cdots$ N(35A)<br>C(21A) $\cdots$ N(28A) | 3.084(8)<br>3.362(10)<br>3.059(8)<br>3.103(8)                                          |
| [C(8B)-C(17B)] $\cdots$ [C(44B)-C(53B)] <sup>b</sup>                                 | 27.0(3)/24.5(5) | 3.78(3)/3.61(5)              | 1.32/1.91         | C(8B) $\cdots$ C(47B)<br>N(9B) $\cdots$ N(45B)<br>C(11B) $\cdots$ C(33B)<br>C(11B) $\cdots$ C(44B)  | 3.410(13)/3.376(13)<br>3.034(10)/2.973(12)<br>3.458(13)/3.26(2)<br>3.408(13)/3.374(14) |
| [C(18B)-C(27B)] $\cdots$ [C(34B)-C(43B)] <sup>b</sup>                                | 15.9(3)/21.7(5) | 3.56(3)/3.75(5)              | 1.61/1.17         | C(18B) $\cdots$ C(36B)<br>C(18B) $\cdots$ C(37B)<br>N(19B) $\cdots$ N(35B)                          | 3.296(14)/3.474(10)<br>3.441(15)/3.327(14)<br>2.896(11)/3.098(13)                      |
| [C(8C)-C(17C)] $\cdots$ [C(34C)-C(43C)]                                              | 18.6(2)         | 3.52(3)                      | 1.30              | C(8C) $\cdots$ C(37C)<br>N(9C) $\cdots$ N(35C)<br>C(10C) $\cdots$ N(35C)                            | 3.310(10)<br>2.957(7)<br>3.294(8)                                                      |
| [C(18C)-C(27C)] $\cdots$ [C(44C)-C(53C)]                                             | 38.4(2)         | 3.82(3)                      | 2.29              | N(19C) $\cdots$ N(45C)<br>C(21C) $\cdots$ C(33C)                                                    | 2.999(7)<br>3.229(8)                                                                   |
| [C(8D)-C(17D)] $\cdots$ [C(34D)-C(43D)]                                              | 54.05(14)       | 4.18(3)                      | 2.43              | N(9D) $\cdots$ N(35D)                                                                               | 3.152(7)                                                                               |
| [C(18D)-C(27D)] $\cdots$ [C(44D)-C(53D)]                                             | 37.48(15)       | 3.94(3)                      | 2.29              | N(19D) $\cdots$ N(45D)<br>C(21D) $\cdots$ C(33D)                                                    | 3.116(7)<br>3.382(8)                                                                   |

<sup>a</sup>These residues are oriented so there is significant overlap between the {pyridyl} quinolyl residues on each ligand, rather than simply the quinolyl groups. More reasonable metric parameters are obtained when the pyridyl group on each ligand is included in the interaction. <sup>b</sup>Values are given for both disorder sites of ligand N(28B)-C(53B) (Figure S30).

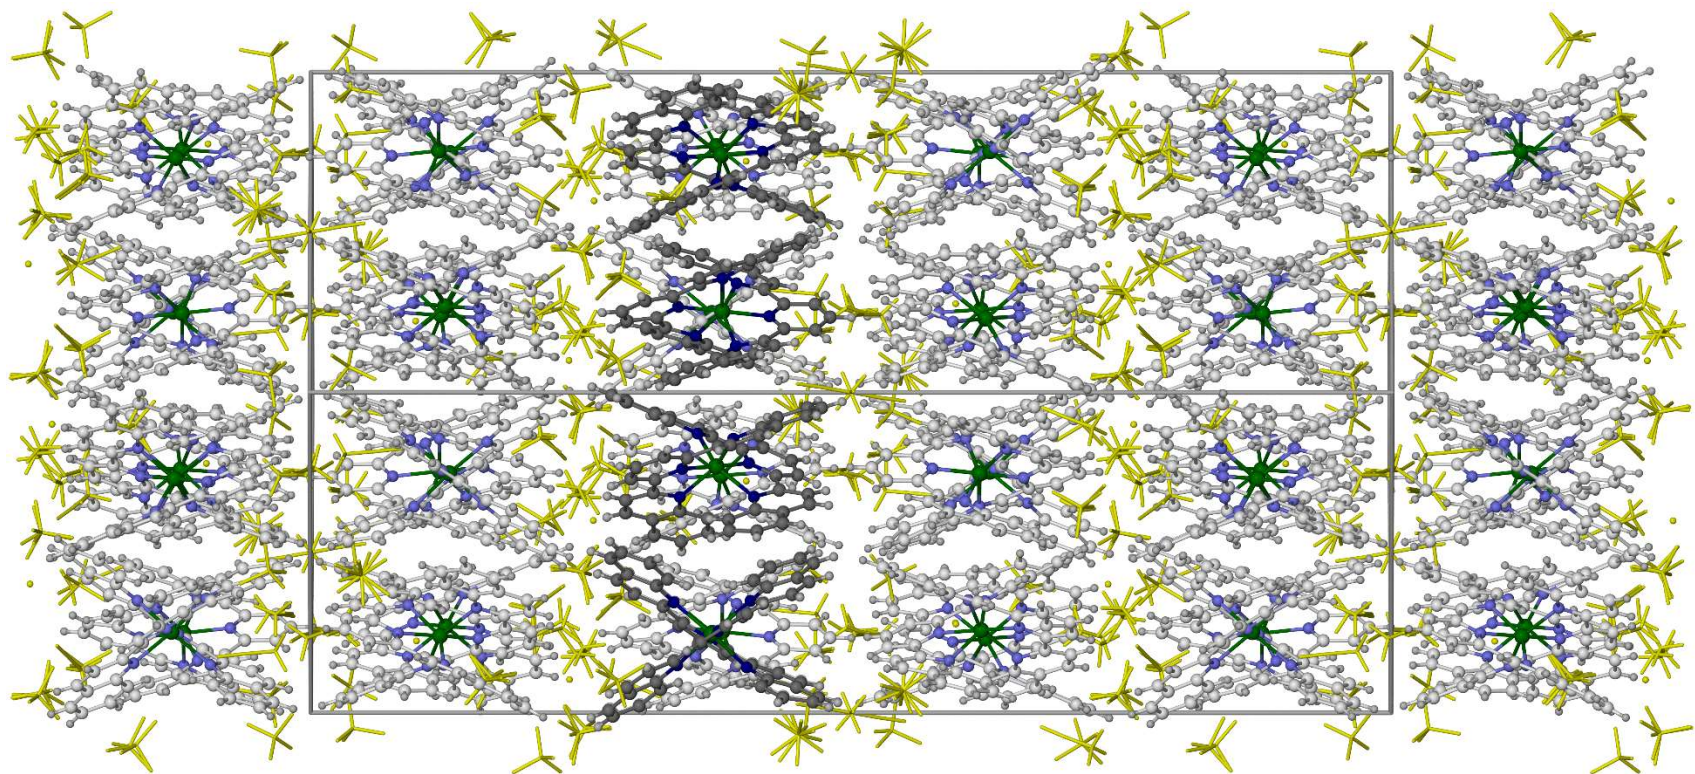

**Figure S33** Full packing diagram of  $4[\text{BF}_4]_2 \cdot 1.39\text{MeCN} \cdot 0.125\text{Et}_2\text{O} \cdot 0.25\text{H}_2\text{O}$ , viewed parallel to the  $[101]$  crystal vector with the  $b$  horizontal. One helical cation stack is highlighted with dark colouration, while the anions and solvent molecules are de-emphasised for clarity.

Colour code: C, white or dark gray; H, pale gray; B, pink; F, cyan; Fe, green; N, pale or dark blue;  $\text{BF}_4^-$ , MeCN,  $\text{Et}_2\text{O}$  and  $\text{H}_2\text{O}$ , yellow.

The A, B, D and C cation sites alternate (in that order) down the  $[10\bar{1}]$  vector, forming helical stacks through intermolecular  $\pi \cdots \pi$  interactions (Figures S34 and S35, Table S9).



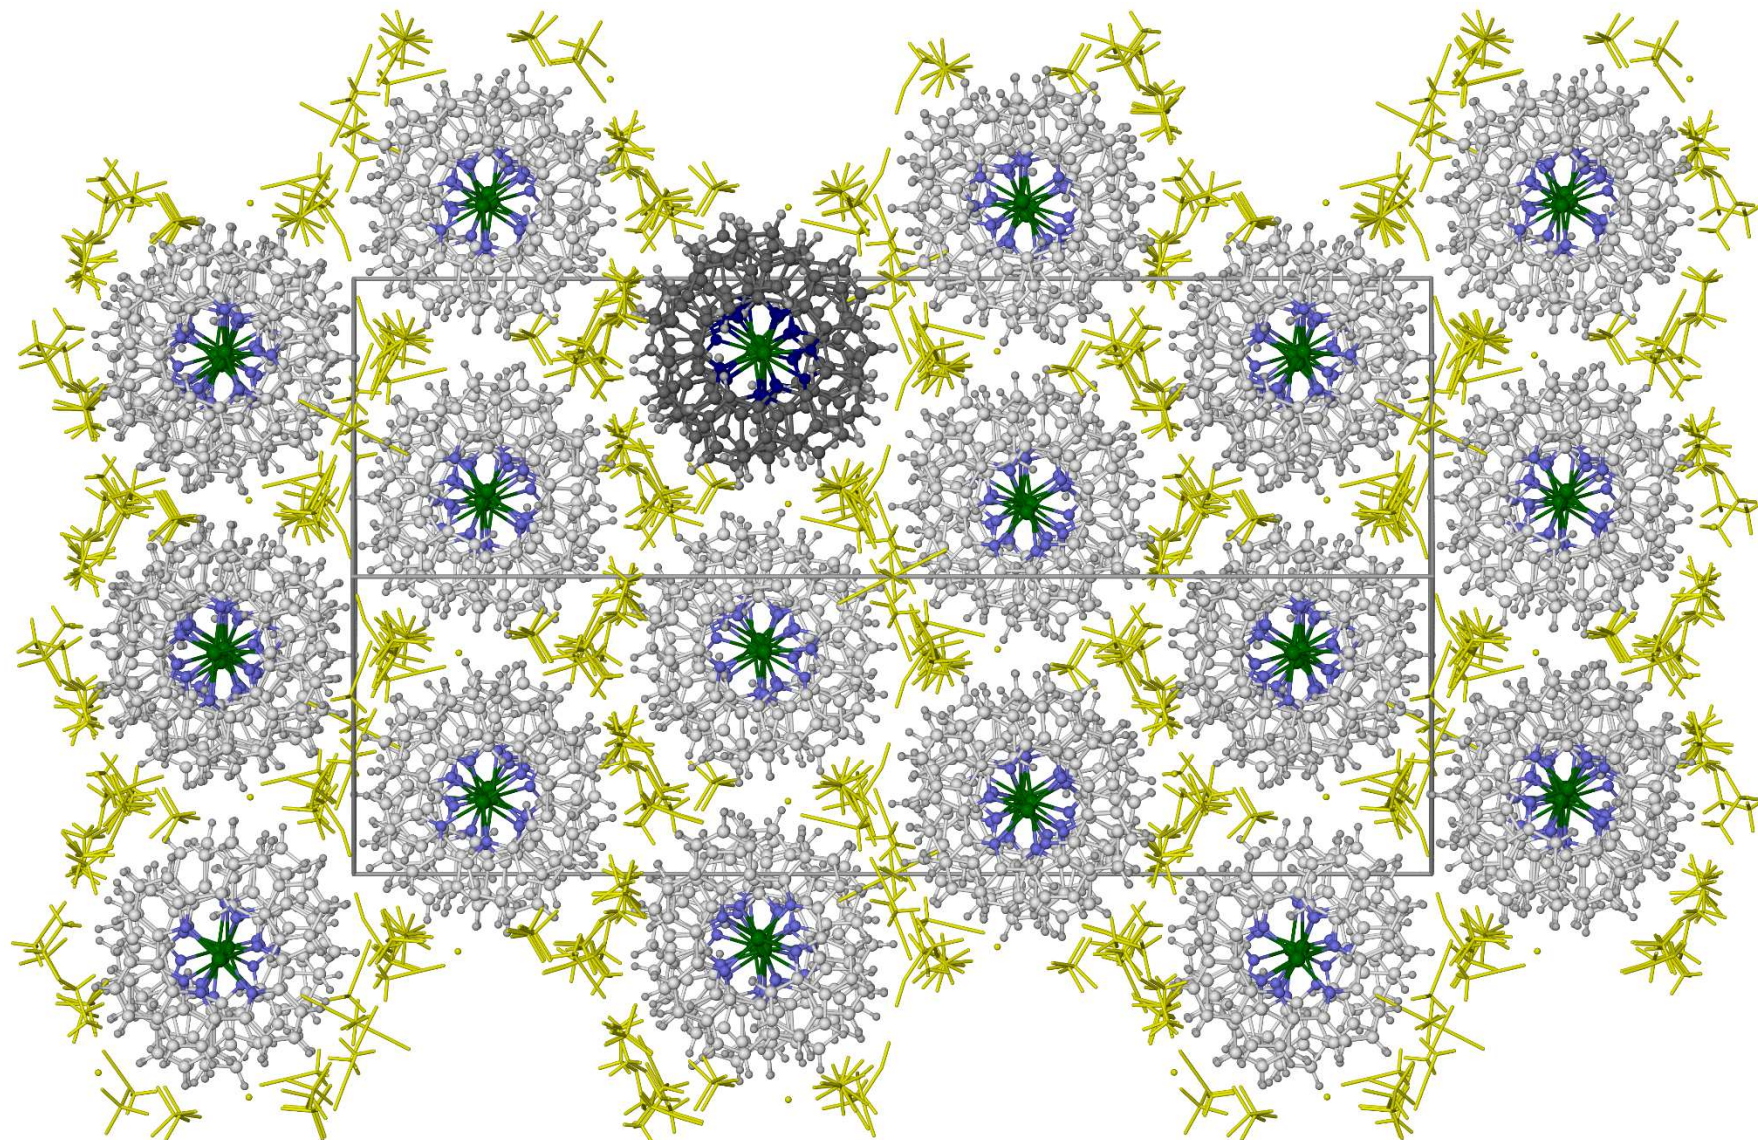

**Figure S34** Alternative packing diagram of  $4[\text{BF}_4]_2 \cdot 1.39\text{MeCN} \cdot 0.125\text{Et}_2\text{O} \cdot 0.25\text{H}_2\text{O}$ , viewed parallel to the  $[10\bar{1}]$  crystal vector with  $b$  horizontal. Details as for Figure S33.

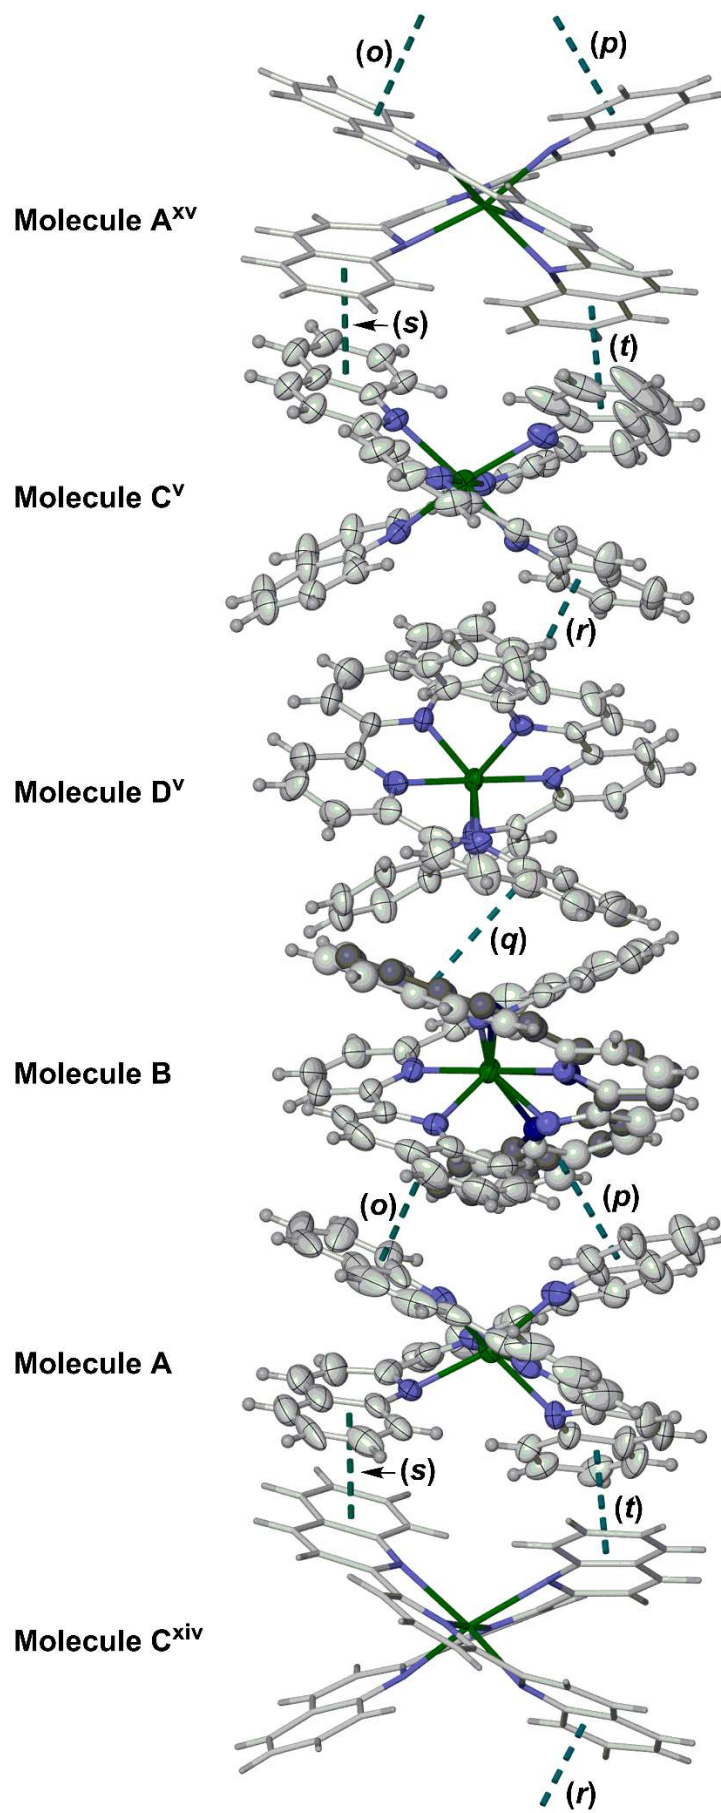

**Figure S35** A helical cation stack in the lattice of  $4[\text{BF}_4]_2 \cdot 1.39\text{MeCN} \cdot 0.125\text{Et}_2\text{O} \cdot 0.25\text{H}_2\text{O}$  (Figure S33), highlighting the intermolecular  $\pi \cdots \pi$  interactions. The code letters for each interaction correspond to those in Table S8. Symmetry codes: (v)  $1-x, 1-y, 1-z$ ; (xiv)  $-x, 1-y, 2-z$ ; (xv)  $1+x, y, -1+z$ .

**Table S9** Intermolecular  $\pi \cdots \pi$  contacts in  $4[\text{BF}_4]_2 \cdot 1.39\text{MeCN} \cdot 0.125\text{Et}_2\text{O} \cdot 0.25\text{H}_2\text{O}$  (Å, °). See Figures S28-S29 for the atom numbering scheme employed, while the codes for each interaction are those in Figure S35. Symmetry codes: (v)  $1-x, 1-y, 1-z$ ; (xiv)  $-x, 1-y, 2-z$ .

| $\pi \cdots \pi$                                                                               | Dihedral angle  | Average inter-planar spacing | Horizontal offset |
|------------------------------------------------------------------------------------------------|-----------------|------------------------------|-------------------|
| [C(44A)-C(53A)] $\cdots$ [C(18B)-C(27B)] ( <b>o</b> )                                          | 10.4(3)         | 3.63(3)                      | 0.91              |
| [C(18A)-C(27A)] $\cdots$ [C(44B)-C(53B)] ( <b>p</b> ) <sup>a</sup>                             | 7.9(5)/5.4(7)   | 3.70(4)/3.89(6)              | 1.39/2.01         |
| [C(34B)-C(43B)] $\cdots$ [C(18D <sup>v</sup> )-C(27D <sup>v</sup> )] ( <b>q</b> ) <sup>a</sup> | 8.35(3)/14.5(5) | 3.60(4)/3.40(9)              | 1.50/1.19         |
| [C(8C)-C(17C)] $\cdots$ [C(44D)-C(53D)] ( <b>r</b> )                                           | 13.2(2)         | 3.66(2)                      | 0.75              |
| [C(8A)-C(17A)] $\cdots$ [C(18C <sup>xiv</sup> )-C(27C <sup>xiv</sup> )] ( <b>s</b> )           | 11.7(3)         | 3.52(3)                      | 1.28              |
| [C(34A)-C(43A)] $\cdots$ [C(34C <sup>xiv</sup> )-C(43C <sup>xiv</sup> )] ( <b>t</b> )          | 3.5(3)          | 3.58(3)                      | 1.09              |

<sup>a</sup>Values are given for both disorder sites of ligand N(28B)-C(53B) (Figure S30).

Strong  $\pi \cdots \pi$  interactions between identical arene residues typically involve overlapping arenes that are coplanar (*ie* dihedral angle  $\approx 0^\circ$ ), and separated by  $< 3.4$  Å (the sum of the van der Waals radii of two arene rings<sup>18</sup>). The interacting rings should be horizontally offset from each other to minimise electrostatic repulsion between their  $\pi$ -systems, although the ideal offset distance depends on their relative orientation.<sup>21</sup>

On that basis, the interactions in the Table are weak dipolar or van der Waals contacts. However, as in Table S7, some interactions that are weak by this measure lead to short intermolecular contacts between individual atoms. These include:

C(42B)/C(42E) $\cdots$ C(26D<sup>v</sup>) = 3.445(13)/3.280(15) and C(43B)/C(43E) $\cdots$ C(24D<sup>v</sup>) = 3.445(13)/3.205(15) Å;  
 C(14C) $\cdots$ C(53D) = 3.433(8), C(15C) $\cdots$ C(52D) = 3.426(9) and C(17C) $\cdots$ C(50D) = 3.315(9) Å;  
 C(52C) $\cdots$ C(16D) = 3.382(10) Å.

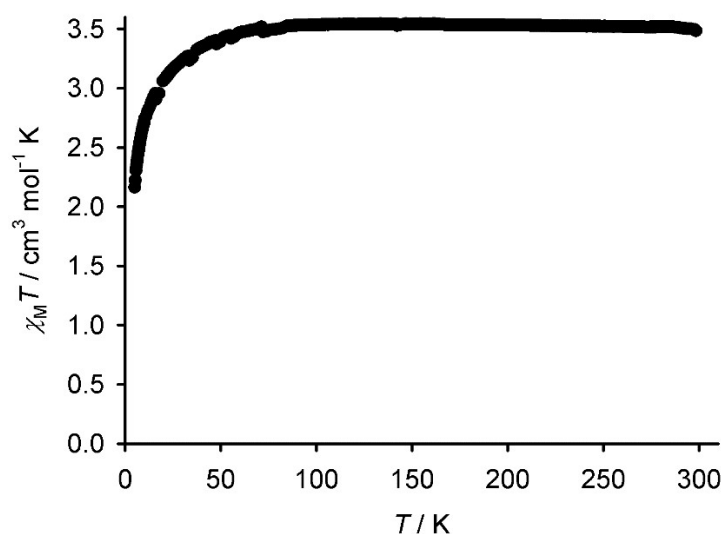

**Figure S36** Variable temperature magnetic susceptibility data for a powder sample of  $4[\text{BF}_4]_2$ .

These data are consistent with an earlier report of the perchlorate salt of this complex, which was high spin above 80 K.<sup>22</sup>

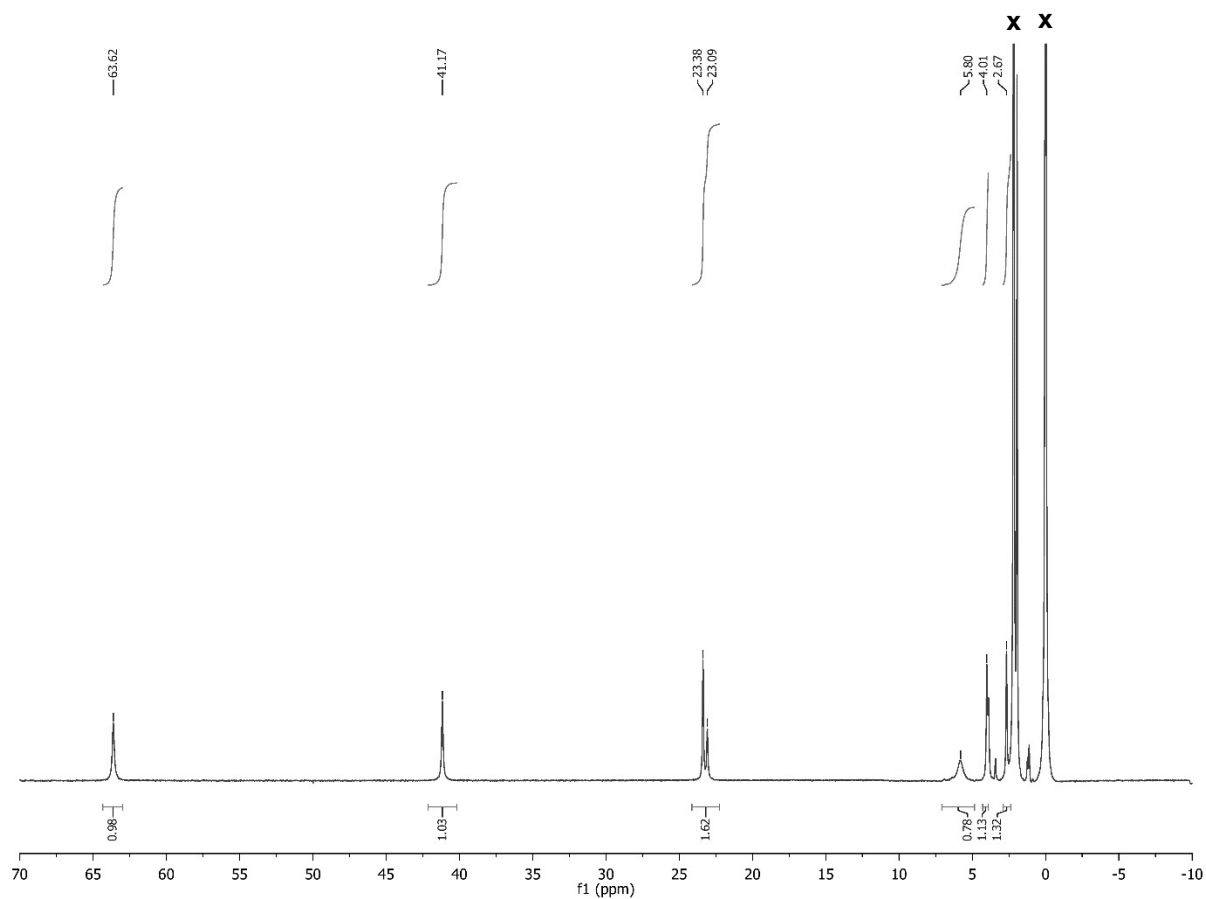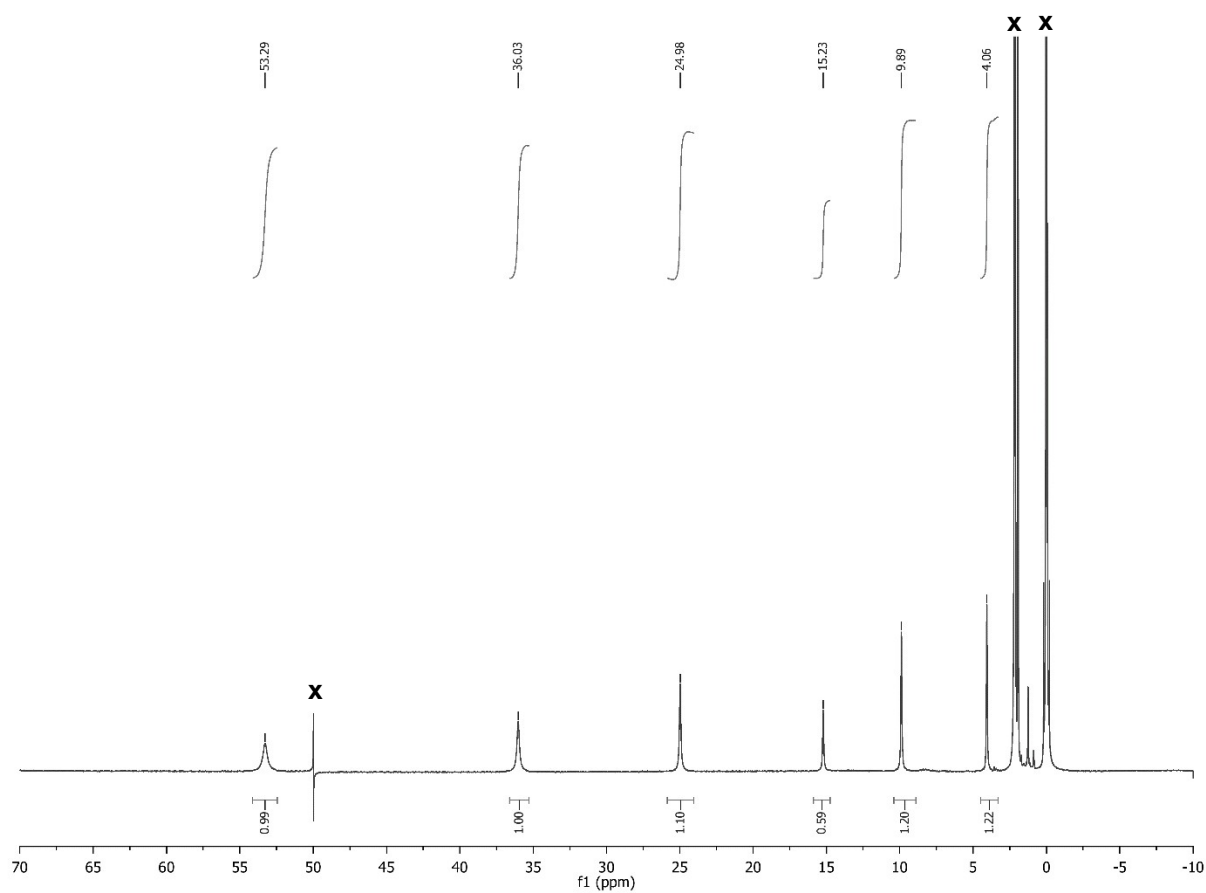

**Figure S37**  $^1\text{H}$  NMR spectra of  $1[\text{BF}_4]_2$  (top) and  $2[\text{BF}_4]_2$  (bottom) in  $\text{CD}_3\text{CN}$ . The feature near 50 ppm in the bottom spectrum is a spectrometer artefact.

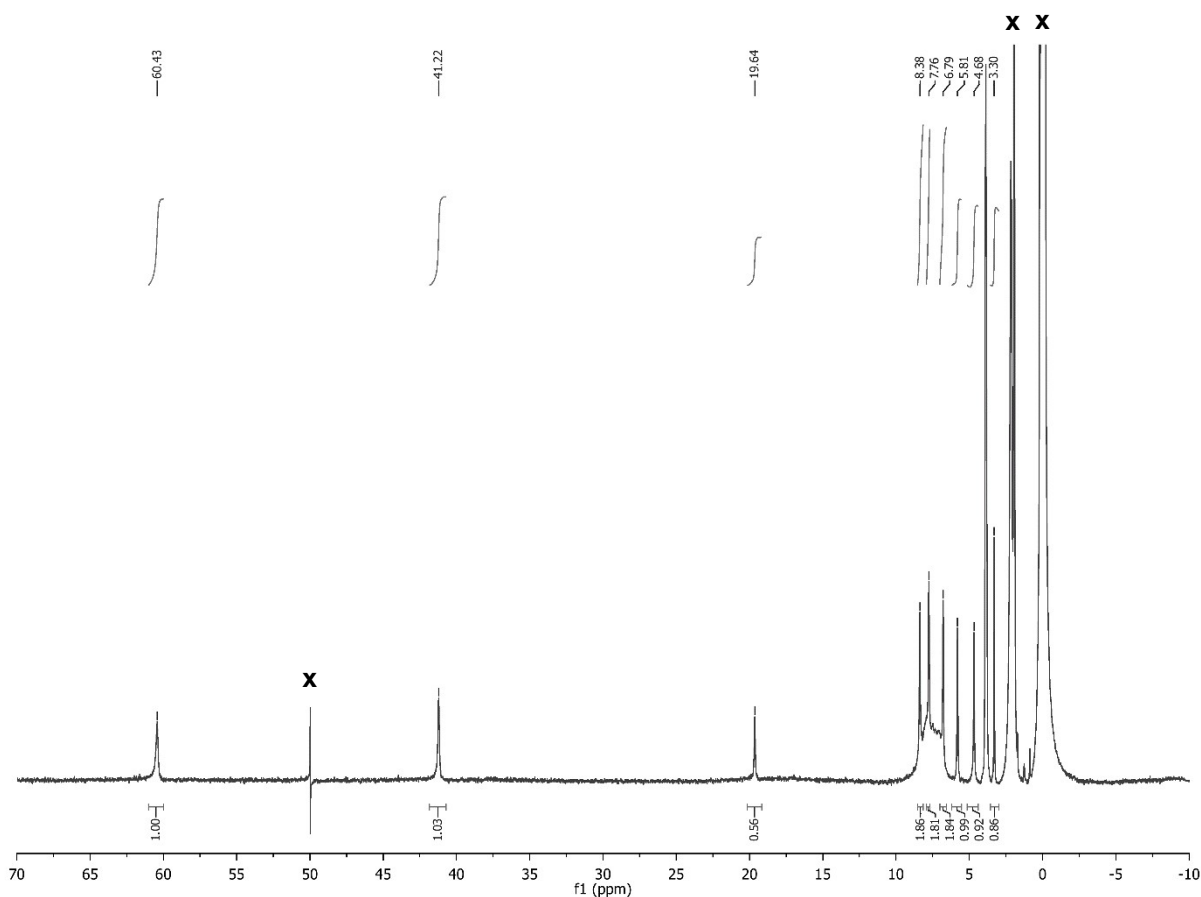

**Figure S38**  $^1\text{H}$  NMR spectrum of a mixture of  $\text{Fe}[\text{BF}_4]_2 \cdot 6\text{H}_2\text{O}$  and 2 equiv  $\text{L}^3$  in  $\text{CD}_3\text{CN}$  at room temperature, which was stirred until all the solid had dissolved. The feature near 50 ppm is a spectrometer artefact.

The nine unique  $^1\text{H}$  resonances expected for a paramagnetic  $\text{L}^3$  species with  $C_2$  or  $m$  symmetry are clearly resolved as sharp peaks in the spectrum. Between 7-9 ppm, these are superimposed on a broader envelope of peaks which we attribute to uncoordinated  $\text{L}^3$  (Figure S3).

The existence of a significant quantity of free  $\text{L}^3$  in such solutions is consistent with our inability to isolate  $[\text{Fe}(\text{L}^3)_2][\text{BF}_4]_2$  as a pure material. This contrasts with solutions of  $[\text{Fe}(\text{L}^1)_2][\text{BF}_4]_2$  and  $[\text{Fe}(\text{L}^2)_2][\text{BF}_4]_2$ , which contain no free ligand by NMR (Figure S37).

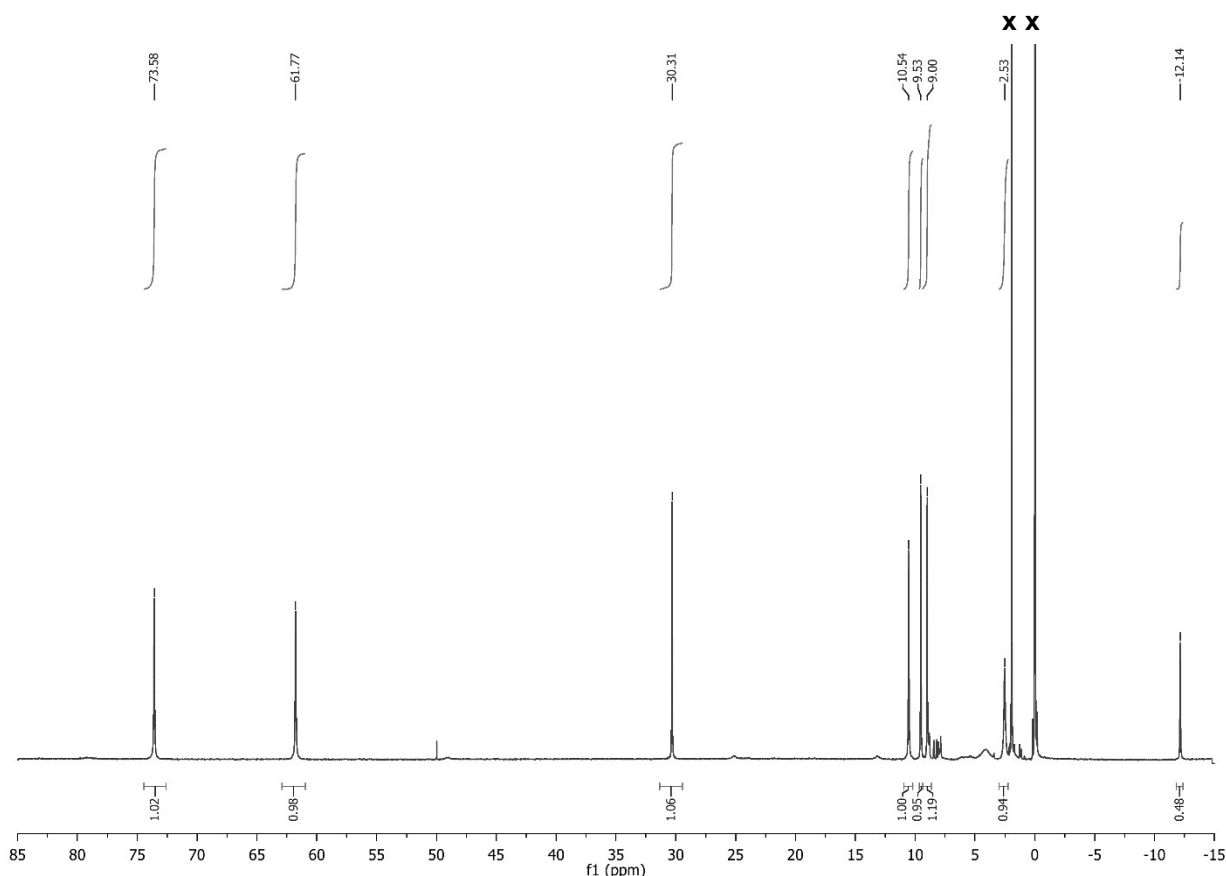

**Figure S39**  $^1\text{H}$  NMR spectrum of  $4[\text{BF}_4]_2$  in  $\text{CD}_3\text{CN}$  at room temperature.

Eight unique resonances are expected from this complex, which are clearly resolved. A small amount of uncoordinated  $\text{L}^4$  is also present in the diamagnetic region (Figure S4), in a *ca* 1:10 ratio compared to the paramagnetic complex.

**Table S10** UV-vis absorption and emission spectrum data for the compounds in this work, from acetonitrile solution at room temperature. The spectra are shown in Figure 7 (main article).

|                                              | Absorption                                                                                                          | Emission                                       |                                   |
|----------------------------------------------|---------------------------------------------------------------------------------------------------------------------|------------------------------------------------|-----------------------------------|
|                                              | $\lambda_{\text{max}} / \text{nm}$ [ $\epsilon_{\text{max}} / 10^3 \text{ dm}^3 \text{ mol}^{-1} \text{ cm}^{-1}$ ] | $\lambda_{\text{max}}^{\text{em}} / \text{nm}$ | $\lambda_{\text{ex}} / \text{nm}$ |
| $\text{L}^1$ <sup>a</sup>                    | 278 (sh), 308 (sh), 325 (sh), 331 [21], 342 (sh)                                                                    | 423                                            | 330                               |
| $1[\text{BF}_4]_2$                           | 340 [39.3]                                                                                                          | 446                                            | 345                               |
| $\text{L}^2$ <sup>a</sup>                    | 338 [20], 364 (sh)                                                                                                  | 457                                            | 335                               |
| $2[\text{BF}_4]_2$                           | 328 (sh), 343 [34.1], 355 (sh)                                                                                      | 445                                            | 340                               |
| $\text{L}^3$ <sup>a</sup>                    | 274 (sh), 315 (sh), 328 [22], 347 [19]                                                                              | 434                                            | 330                               |
| $3'[\text{BF}_4]_2 \cdot \text{H}_2\text{O}$ | 327 [24.2], 344 [24.4], 367 (sh)                                                                                    | 453                                            | 345                               |
| $\text{L}^4$ <sup>b</sup>                    | 310 [30.7], 321 [30.4], 336 [15.5]                                                                                  | 435                                            | 310                               |
| $4[\text{BF}_4]_2$                           | 282 (sh), 312 (sh), 327 [17.1], 364 [23.1]                                                                          | 499                                            | 320                               |

<sup>a</sup>Errors on the extinction coefficients in the absorption spectra of  $\text{L}^1$ - $\text{L}^3$  are estimated at  $\pm 2 \times 10^3 \text{ dm}^3 \text{ mol}^{-1} \text{ cm}^{-1}$ , because of the low solubility of those compounds. <sup>b</sup>These data are consistent with literature values.<sup>23</sup>

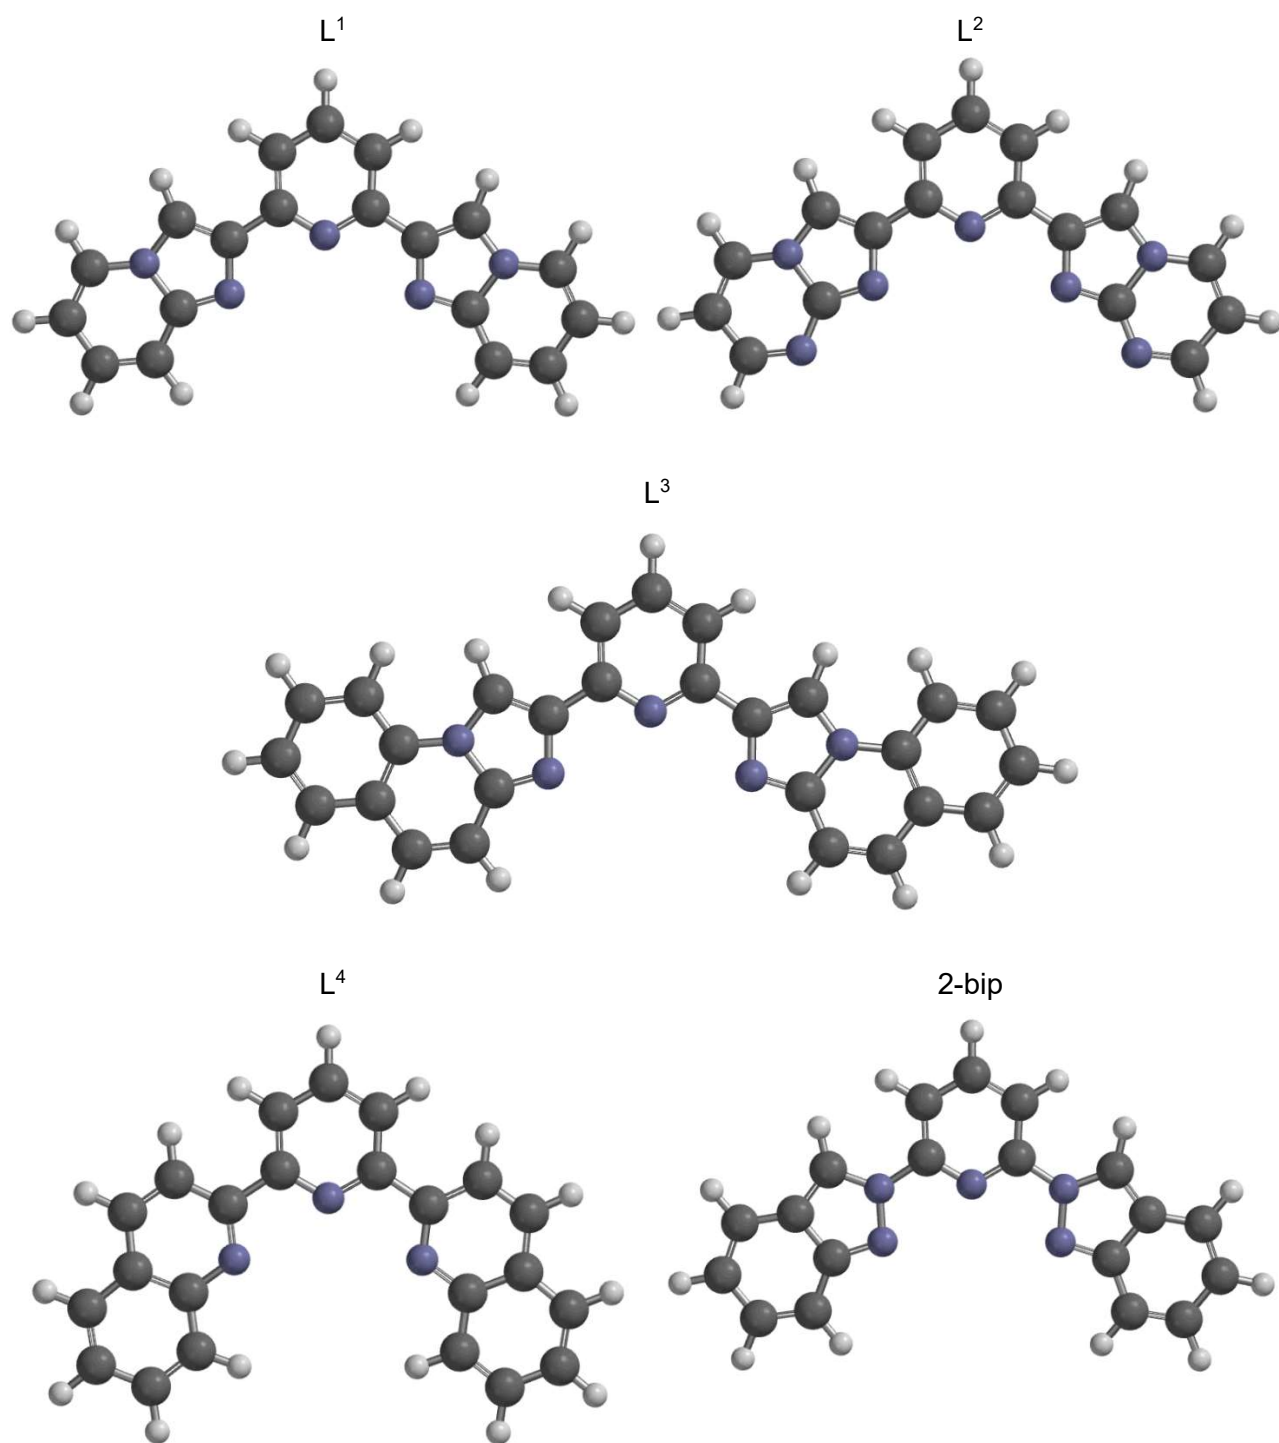

**Figure S40** Computed molecular structures for the organic ligands, minimised in the *cisoid* conformation appropriate for metal binding. Colour code: C, dark grey; H, white; N, blue.

A minimisation of  $L^4$  in this conformation was only achieved by fixing the torsions between the pyridyl and quinolyl rings to  $\pm 1.5^\circ$ . The other ligands in the Figure minimised to a *cisoid* conformation without constraints.

The calculation of metal-free bippy in Table S11 and Figure S42 is taken from ref. 24.

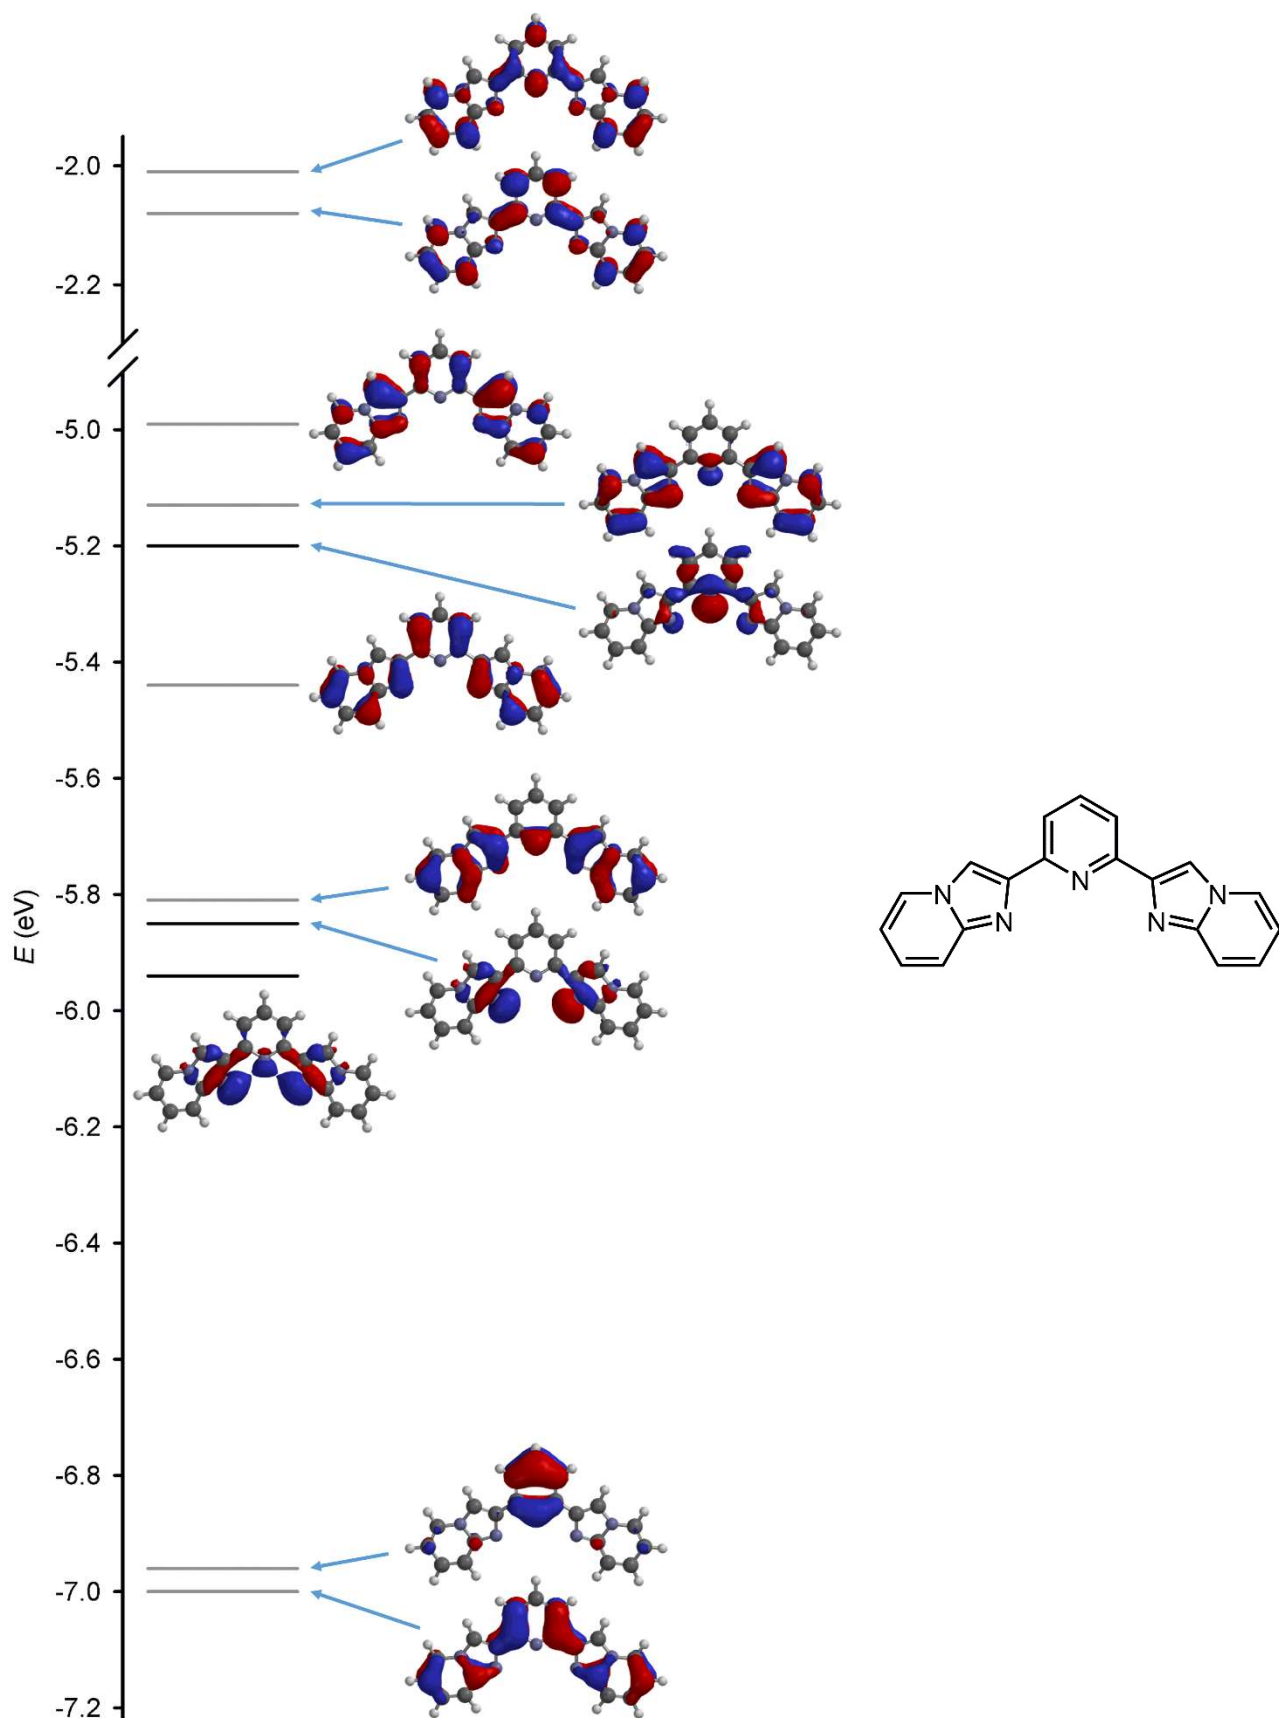

**Figure S41** Frontier orbital plots for L<sup>1</sup>. The energy levels are colour-coded as: N atom lone pair combination MOs (black); and  $\pi$  or  $\pi^*$  MOs (grey).

The frontier orbitals of all the ligands in Figure S42 have the same form as the ones in this Figure, with minor differences reflecting the disposition of N atoms around each ligand framework.



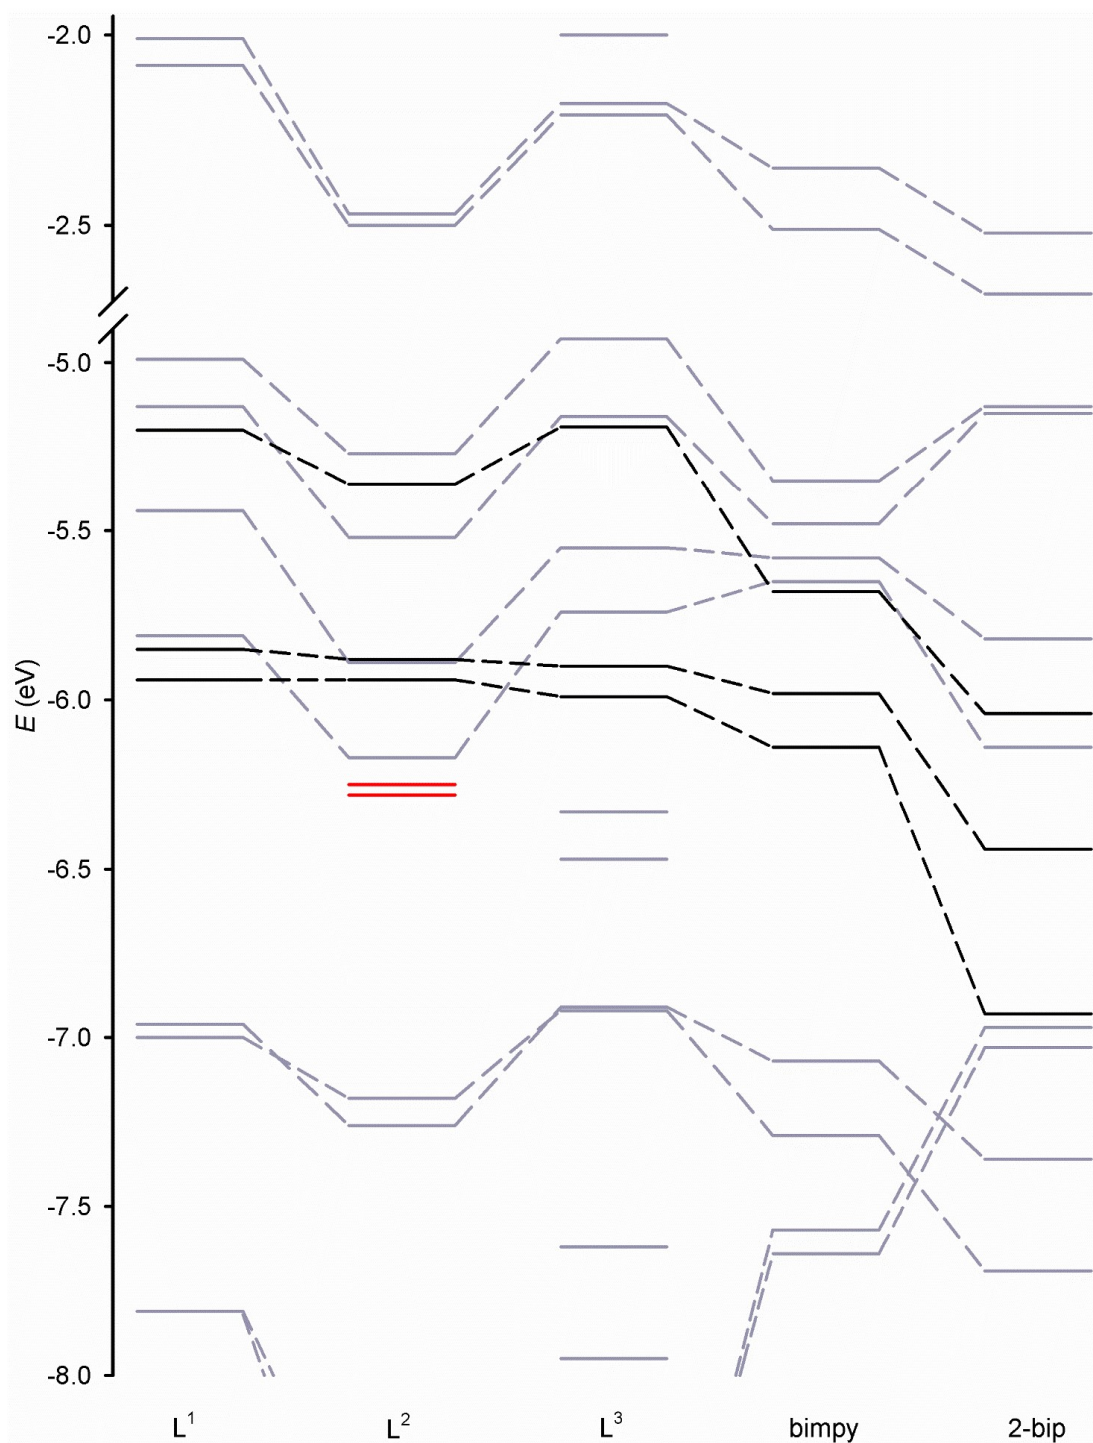

**Figure S42** Frontier orbital energies for the *bis(azolyl)pyridine* ligands computed in this work (Figure S40). The energy levels are colour coded as N-donor lone pair combinations (black); other N atom lone pair MOs (red, L<sup>2</sup> only); and  $\pi$  or  $\pi^*$  MOs (grey). The data for *bimpy* are taken from ref. 24.

The metal-binding N lone pair MO energies run as  $L^1 \approx L^2 \approx L^3 > \text{bimpy} > 2\text{-bip}$  (Table S11).

The HOMO and HOMO-1 of L<sup>1</sup>, L<sup>3</sup>, *bimpy* and 2-*bip* are azole-centred  $\pi$  orbitals with smaller pyridyl contributions, which should contribute to ligand→metal  $\pi$ -bonding (Figure S41). The equivalent orbitals in L<sup>2</sup> are the HOMO and HOMO-2.

The LUMO and LUMO+1 are  $\pi^*$ -orbitals which are mostly centered on the pyridyl ring (Figure S41). The LUMO has a node at the pyridyl N atom, but the LUMO+1 should contribute to metal→ligand  $\pi$ -bonding.

See the next page for more discussion.

**Table S11** Computed energies of the minimised organic ligands, and the energies of their N-donor lone pair (LP) combination MOs (Figure S41-S42). The  $E_{av}\{\text{LP}\}$  values are also listed in Table 4 (main article).

|                             | $E / \text{Ha}$ | $E\{\text{LP 1}\} / \text{eV}$ | $E\{\text{LP 2}\} / \text{eV}$ | $E\{\text{LP 3}\} / \text{eV}$ | $E_{av}\{\text{LP}\} / \text{eV}$ |
|-----------------------------|-----------------|--------------------------------|--------------------------------|--------------------------------|-----------------------------------|
| L <sup>1</sup>              | -1005.255057    | -5.20                          | -5.85                          | -5.94                          | -5.66                             |
| L <sup>2</sup> <sup>a</sup> | -1037.308291    | -5.36                          | -5.88                          | -5.94                          | -5.73                             |
| L <sup>3</sup>              | -1312.455142    | -5.19                          | -5.90                          | -5.99                          | -5.69                             |
| L <sup>4</sup>              | -1049.388607    | -5.15                          | -5.42                          | -5.71                          | -5.43                             |
| bimpy <sup>b</sup>          | -1005.289103    | -5.68                          | -5.98                          | -6.14                          | -5.93                             |
| 2-bip                       | -1005.216032    | -6.04                          | -6.44                          | -6.93                          | -6.47                             |

<sup>a</sup>This ligand has two additional lone pair combinations at lower energy, with larger contributions from their peripheral imidazopyrimidinyl N8 atoms (coloured red in Figure S42). <sup>b</sup>Data from ref 24.

### Discussion of these data, and the other frontier orbitals in the ligands (Figures S41 and S42)

$E_{av}\{\text{LP}\}$  is a measure of the Brønsted basicity of the ligands in the gas phase. These give the following trend, where the most basic ligand has the highest  $E_{av}\{\text{LP}\}$  energy:

$$2\text{-bip} < \text{bimpy} < \text{L}^2 \approx \text{L}^3 \approx \text{L}^1 < \text{L}^4$$

That is, 2-bip is the least  $\sigma$ -donating ligand in the series and L<sup>4</sup> is the strongest. The basicity of L<sup>4</sup> resembles its non-annelated analogue 2,2':6',2''-terpyridine (terpy) computed by this method ( $E_{av}\{\text{LP}\} = -5.40$ ), while 2-bip is similar to non-annelated 2,6-di(pyrazol-1-yl)pyridine (1-bpp;  $E_{av}\{\text{LP}\} = -6.39$ ).<sup>24</sup>

It is impossible to deconvolute the individual basicities of the different heterocyclic N-donors from these data, because there is extensive mixing of the N lone pair MOs. However, excepting L<sup>4</sup>, the order reflects the basic  $pK_a$ s of the distal heterocyclic donors on each ligand:<sup>26</sup>

$$2\text{-methylindazole} (pK_a = 2.0) < 1H\text{-benzimidazole} (5.6) < \text{imidazo}[1,2\text{-a}]\text{pyridine} (6.9)$$

Both  $\pi$ -donor (from the distal heterocyclic donor groups) and  $\pi$ -acceptor (to the central pyridyl ring) properties must be considered when ranking the  $\pi$ -acidity of the ligands.

- The HOMO-1 and HOMO of each ligand are  $\pi$ -orbitals with significant contributions from the azolyl N-donor atoms, which should both have  $\pi$ -donor character to a coordinated metal ion (Figure S41).
- While the LUMO and LUMO+1 are pyridyl-centred  $\pi^*$ -MOs, only the LUMO+1 has  $\pi$ -acceptor capability since the LUMO has a node at the pyridyl N-donor atom (Figure S41).

With that in mind, the following observations can be made from Figure S42.

(i) The frontier orbitals of L<sup>2</sup> imply it is both a worse  $\pi$ -donor, and a better  $\pi$ -acceptor, than L<sup>1</sup> or L<sup>3</sup>. The greater  $\pi$ -acidity of L<sup>2</sup> should explain why **2**[BF<sub>4</sub>]<sub>2</sub> has a higher SCO  $T_{1/2}$  value than **1**[BF<sub>4</sub>]<sub>2</sub> in solution.

(ii) 2-bip has similar HOMO-1 and HOMO energies to L<sup>1</sup>, but a lower LUMO+1. Hence, while 2-bip is the weakest  $\sigma$ -donor ligand in this study, that is partly offset by its stronger  $\pi$ -acceptor properties. As a result, the computed  $\Delta E_{rel}\{\text{HS-LS}\}$  and experimental  $T_{1/2}$  for [Fe(bip)<sub>2</sub>][BF<sub>4</sub>]<sub>2</sub> are only slightly lower than for **1**[BF<sub>4</sub>]<sub>2</sub>.

(iii) The bimpy ligand is computed to be less basic than L<sup>1</sup>-L<sup>3</sup>, but with comparable M-L  $\pi$ -bonding properties to L<sup>2</sup> (L<sup>2</sup> and bimpy have similar energies for their HOMO-1 and HOMO, but the LUMO+1 of bimpy is slightly higher energy). Hence, unlike the other complexes, the properties of the free ligands do not simply relate to the stabilisation of the low-spin state in [Fe(bimpy)<sub>2</sub>][BF<sub>4</sub>]<sub>2</sub>. This is discussed in the main article.

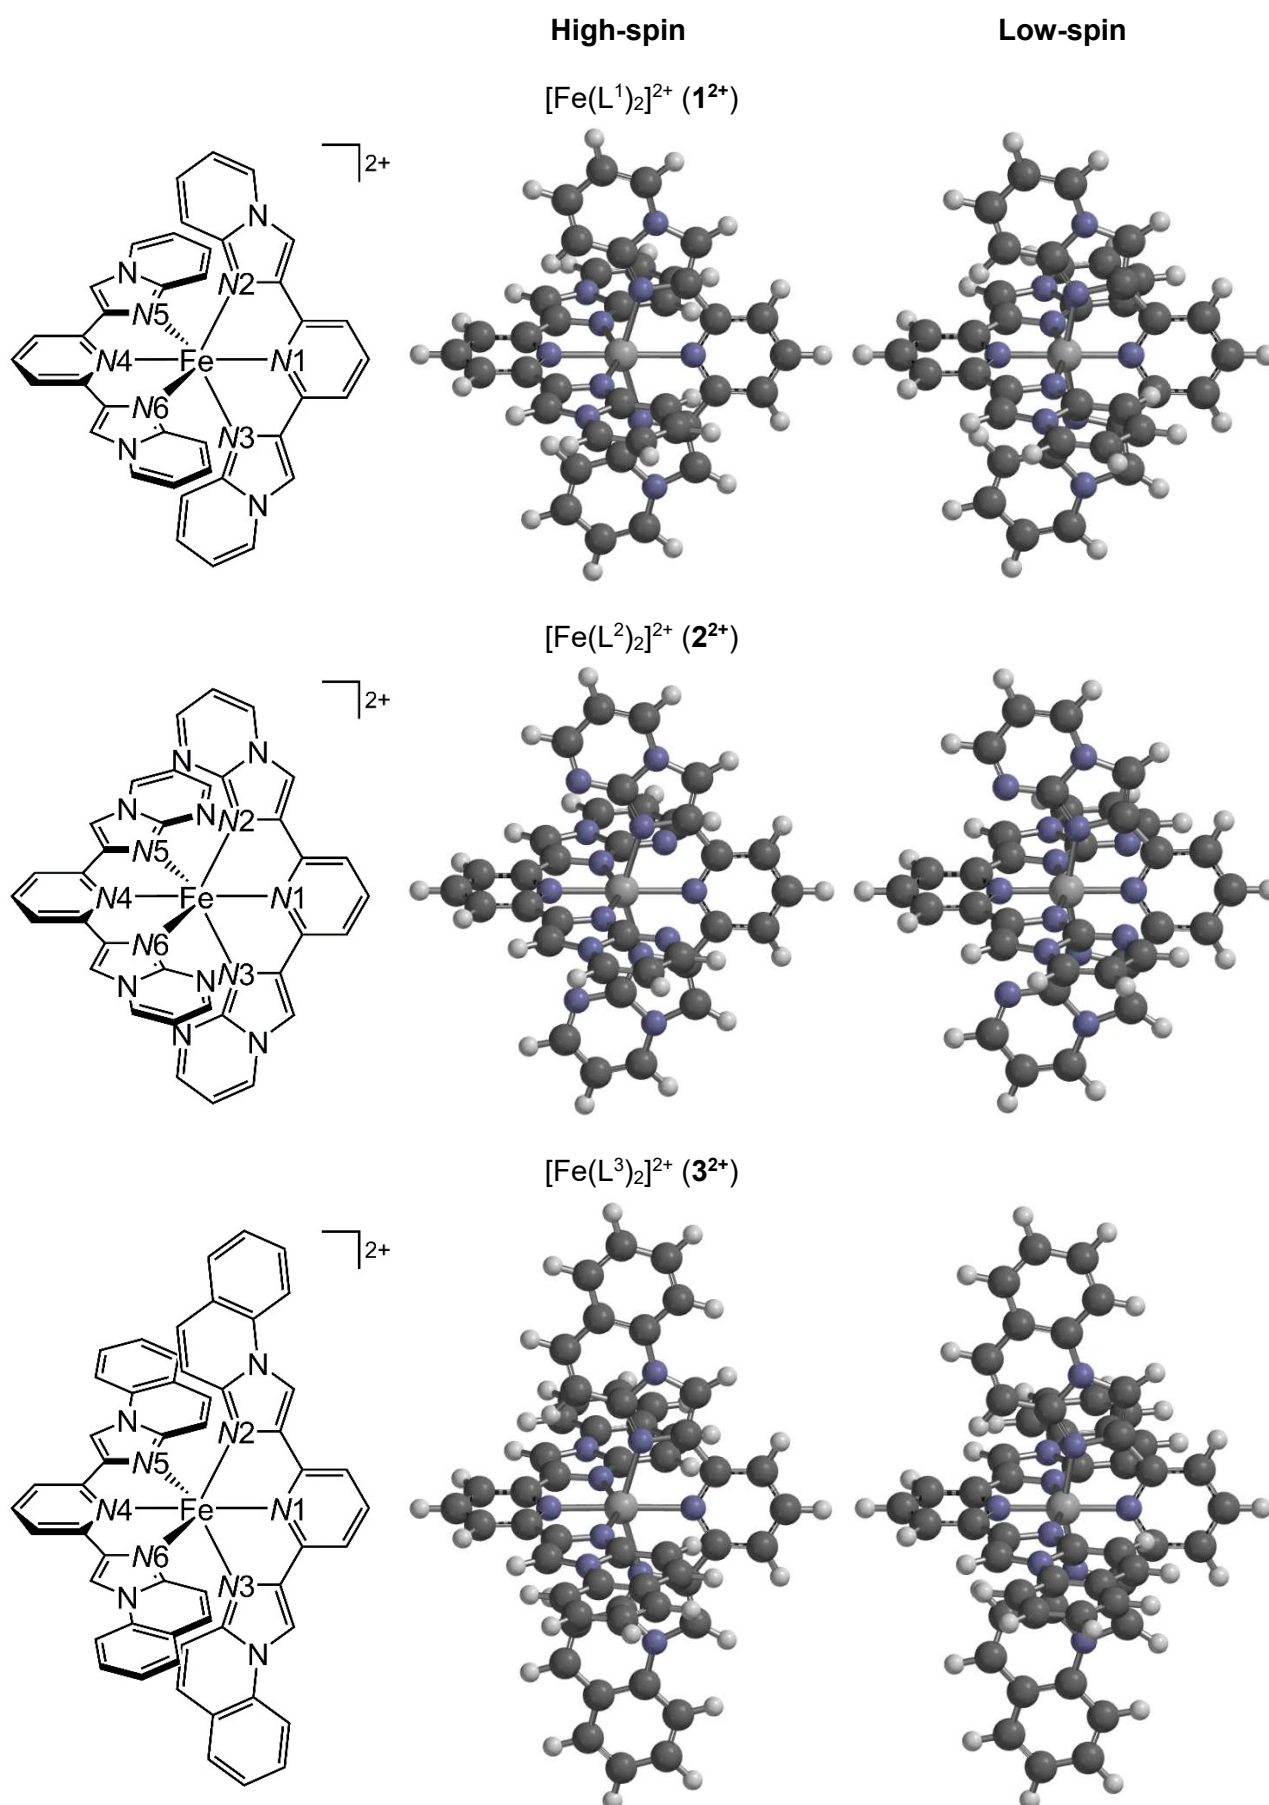

**Figure S43** Energy-minimised structures of the complexes in the gas phase. The atom numbering used in Table S12 is also shown (which is different from the atom numbering in the crystal structures). Colour code: C, dark grey; H, white; N, blue; Fe, pale grey.

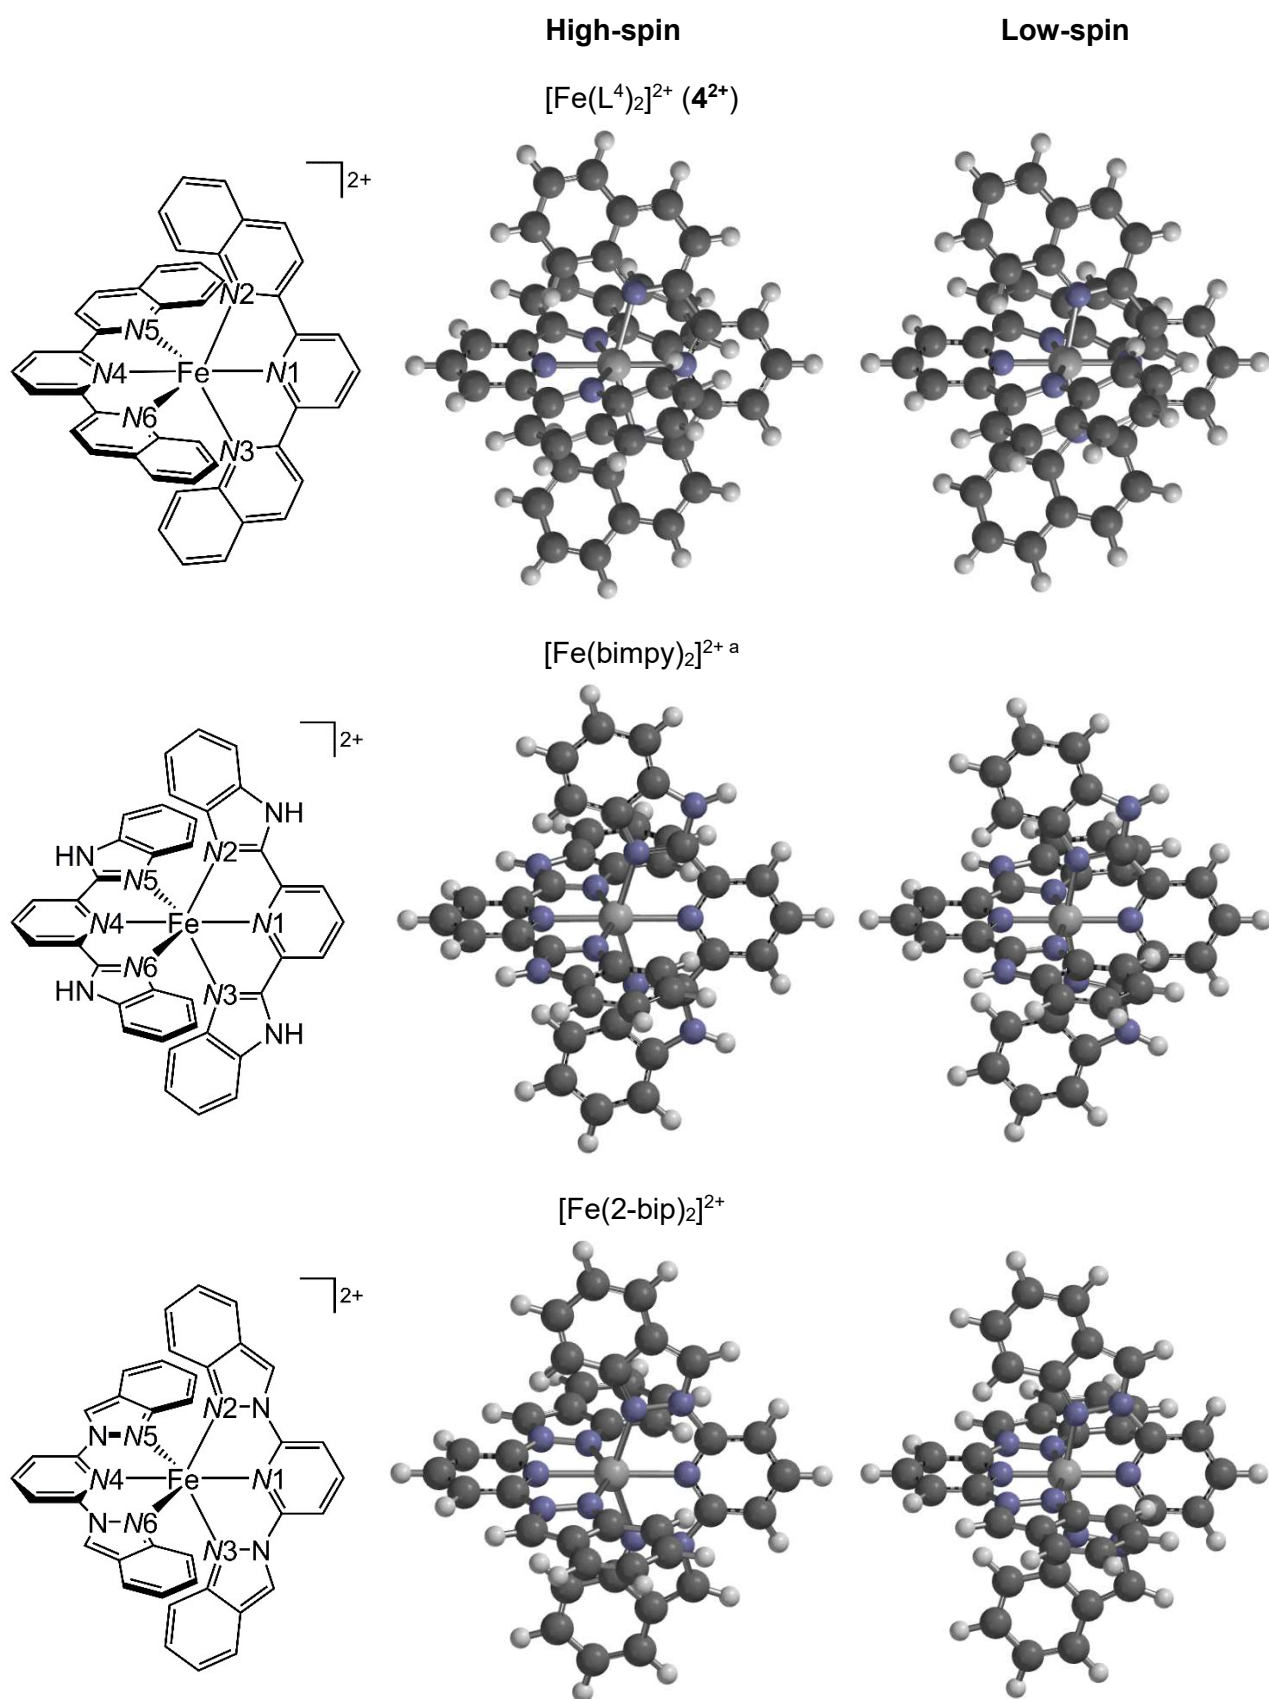

Figure S43 continued.

<sup>a</sup>From ref. 24.

**Table S12** Computed metric parameters for the complexes in this work (Å, deg). See Figure S43 for the atom numbering scheme in the Table. Where available, crystallographic values are also given in square brackets for comparison. HS = high-spin, LS = low-spin.  $\alpha$  is the average ligand bite angle in the molecule; see page S13 for definitions of  $\phi$  and  $\theta$ .

|                             | [Fe(L <sup>1</sup> ) <sub>2</sub> ] <sup>2+</sup> ( <b>1</b> <sup>2+</sup> ) |                    | [Fe(L <sup>2</sup> ) <sub>2</sub> ] <sup>2+</sup> ( <b>2</b> <sup>2+</sup> ) |       | [Fe(L <sup>3</sup> ) <sub>2</sub> ] <sup>2+</sup> ( <b>3</b> <sup>2+</sup> ) |       |
|-----------------------------|------------------------------------------------------------------------------|--------------------|------------------------------------------------------------------------------|-------|------------------------------------------------------------------------------|-------|
|                             | HS <sup>a</sup>                                                              | LS <sup>b</sup>    | HS <sup>c</sup>                                                              | LS    | HS                                                                           | LS    |
| Fe–N1                       | 2.167 [2.175(3)]                                                             | 1.923 [1.923(3)]   | 2.164 [2.148(2)]                                                             | 1.924 | 2.169                                                                        | 1.926 |
| Fe–N2                       | 2.228 [2.199(4)]                                                             | 2.011 [1.979(3)]   | 2.204 [2.193(2)]                                                             | 1.984 | 2.225                                                                        | 2.012 |
| Fe–N3                       | 2.228 [2.191(3)]                                                             | 2.011 [1.988(3)]   | 2.204 [2.183(2)]                                                             | 1.984 | 2.226                                                                        | 2.012 |
| Fe–N4                       | 2.167 [2.175(3)]                                                             | 1.923 [1.921(3)]   | 2.164 [2.154(2)]                                                             | 1.924 | 2.169                                                                        | 1.926 |
| Fe–N5                       | 2.228 [2.199(3)]                                                             | 2.011 [1.997(3)]   | 2.204 [2.197(2)]                                                             | 1.984 | 2.231                                                                        | 2.012 |
| Fe–N6                       | 2.228 [2.191(4)]                                                             | 2.011 [2.002(3)]   | 2.204 [2.201(2)]                                                             | 1.984 | 2.222                                                                        | 2.012 |
| Fe–N{pyridyl} <sub>av</sub> | 2.167 [2.175(3)]                                                             | 1.923 [1.922(4)]   | 2.164 [2.151(3)]                                                             | 1.924 | 2.169                                                                        | 1.926 |
| Fe–N{distal} <sub>av</sub>  | 2.228 [2.195(5)]                                                             | 2.011 [1.992(6)]   | 2.204 [2.182(4)]                                                             | 1.984 | 2.226                                                                        | 2.012 |
| N1–Fe–N2                    | 74.6 [73.84(13)]                                                             | 80.6 [80.33(12)]   | 74.6 [74.78(9)]                                                              | 80.6  | 74.6                                                                         | 80.7  |
| N1–Fe–N3                    | 74.6 [74.41(12)]                                                             | 80.6 [80.71(12)]   | 74.6 [74.57(9)]                                                              | 80.6  | 74.6                                                                         | 80.7  |
| N1–Fe–N4                    | 180.0 [176.42(18)]                                                           | 180.0 [178.82(11)] | 180.0 [163.52(9)]                                                            | 180.0 | 178.5                                                                        | 180.0 |
| N1–Fe–N5                    | 105.4 [108.75(12)]                                                           | 99.4 [99.07(11)]   | 105.4 [120.61(9)]                                                            | 99.4  | 104.0                                                                        | 99.3  |
| N1–Fe–N6                    | 105.4 [103.08(12)]                                                           | 99.4 [99.79(12)]   | 105.4 [90.12(9)]                                                             | 99.4  | 106.8                                                                        | 99.3  |
| N2–Fe–N3                    | 149.2 [148.15(12)]                                                           | 161.3 [161.01(13)] | 149.1 [148.43(9)]                                                            | 161.1 | 149.2                                                                        | 161.4 |
| N2–Fe–N4                    | 105.4 [108.75(12)]                                                           | 99.4 [100.75(11)]  | 105.4 [110.48(9)]                                                            | 99.4  | 105.8                                                                        | 99.3  |
| N2–Fe–N5                    | 95.9 [93.03(19)]                                                             | 91.5 [92.01(11)]   | 96.2 [98.12(9)]                                                              | 91.5  | 97.0                                                                         | 91.5  |
| N2–Fe–N6                    | 92.2 [94.79(13)]                                                             | 91.5 [91.12(11)]   | 91.9 [91.67(9)]                                                              | 91.5  | 91.1                                                                         | 91.5  |
| N3–Fe–N4                    | 105.4 [103.08(12)]                                                           | 99.4 [98.23(12)]   | 105.4 [101.07(9)]                                                            | 99.4  | 105.0                                                                        | 99.3  |
| N3–Fe–N5                    | 92.2 [94.79(13)]                                                             | 91.5 [91.82(11)]   | 91.9 [90.99(9)]                                                              | 91.5  | 91.3                                                                         | 91.5  |
| N3–Fe–N6                    | 95.9 [94.64(19)]                                                             | 91.5 [91.24(11)]   | 96.2 [95.79(9)]                                                              | 91.5  | 96.8                                                                         | 91.5  |
| N4–Fe–N5                    | 74.6 [73.84(13)]                                                             | 80.6 [80.43(12)]   | 74.6 [74.86(9)]                                                              | 80.6  | 74.6                                                                         | 80.7  |
| N4–Fe–N6                    | 74.6 [74.41(12)]                                                             | 80.6 [80.70(12)]   | 74.6 [74.35(9)]                                                              | 80.6  | 74.7                                                                         | 80.7  |
| N5–Fe–N6                    | 149.2 [148.15(12)]                                                           | 161.3 [161.14(12)] | 149.1 [149.19(9)]                                                            | 161.1 | 149.3                                                                        | 161.4 |
| $\alpha$                    | 74.6 [74.13(18)]                                                             | 80.6 [80.5(2)]     | 74.6 [74.64(18)]                                                             | 80.6  | 74.6                                                                         | 80.7  |
| $\phi$                      | 180.0 [176.42(18)]                                                           | 180.0 [178.82(11)] | 180.0 [163.52(9)]                                                            | 180.0 | 178.5                                                                        | 180.0 |
| $\theta$                    | 89.2 [89.66(3)]                                                              | 90.0 [88.90(3)]    | 89.2 [87.59(3)]                                                              | 90.0  | 87.7                                                                         | 90.0  |

<sup>a</sup>Crystallographic data from **1**[BF<sub>4</sub>]<sub>2</sub>·MeCN (Table S2). <sup>c</sup>Crystallographic data from **1**[BF<sub>4</sub>]<sub>2</sub>·1.7MeNO<sub>2</sub>·0.3MeNO<sub>2</sub> (Table S2). <sup>e</sup>Crystallographic data from **2**[BF<sub>4</sub>]<sub>2</sub>·1.5MeCN (Table S4). <sup>d</sup>Crystallographic data from molecule D of **4**[BF<sub>4</sub>]<sub>2</sub>·1.39MeCN·0.125Et<sub>2</sub>O·0.25H<sub>2</sub>O (Figure S36, Table S7). <sup>e</sup>From ref. 25. <sup>f</sup>Crystallographic data from ref. 23. <sup>g</sup>Crystallographic data from ref. 19.

Table S12 continued.

|                                       | [Fe(L <sup>4</sup> ) <sub>2</sub> ] <sup>2+</sup> (4 <sup>2+</sup> ) |       | [Fe(bimpy) <sub>2</sub> ] <sup>2+</sup> <sup>e</sup> |                    | [Fe(2-bip) <sub>2</sub> ] <sup>2+</sup> |                    |
|---------------------------------------|----------------------------------------------------------------------|-------|------------------------------------------------------|--------------------|-----------------------------------------|--------------------|
|                                       | HS <sup>d</sup>                                                      | LS    | HS                                                   | LS <sup>f</sup>    | HS                                      | LS <sup>g</sup>    |
| Fe–N1                                 | 2.103 [2.114(5)]                                                     | 1.897 | 2.161                                                | 1.920 [1.8759(14)] | 2.163                                   | 1.901 [1.886(2)]   |
| Fe–N2                                 | 2.304 [2.249(5)]                                                     | 2.090 | 2.223                                                | 2.004 [1.9880(17)] | 2.188                                   | 1.997 [1.962(2)]   |
| Fe–N3                                 | 2.304 [2.252(5)]                                                     | 2.090 | 2.226                                                | 2.004 [1.9892(19)] | 2.199                                   | 1.998 [1.974(2)]   |
| Fe–N4                                 | 2.103 [2.099(4)]                                                     | 1.897 | 2.161                                                | 1.920 [1.8734(14)] | 2.168                                   | 1.899 [1.884(2)]   |
| Fe–N5                                 | 2.304 [2.286(5)]                                                     | 2.090 | 2.227                                                | 2.004 [1.9832(18)] | 2.191                                   | 1.998 [1.968(2)]   |
| Fe–N6                                 | 2.304 [2.252(5)]                                                     | 2.090 | 2.223                                                | 2.004 [1.9922(19)] | 2.194                                   | 2.000 [1.966(2)]   |
| Fe–N{pyridyl} <sub>av</sub>           | 2.103 [2.107(6)]                                                     | 1.897 | 2.161                                                | 1.920 [1.875(2)]   | 2.166                                   | 1.900 [1.885(3)]   |
| Fe–N{distal} <sub>av</sub>            | 2.304 [2.260(10)]                                                    | 2.090 | 2.225                                                | 2.004 [1.988(4)]   | 2.193                                   | 1.998 [1.968(4)]   |
| <i>N1</i> –Fe– <i>N2</i>              | 74.4 [73.4(2)]                                                       | 79.8  | 74.6                                                 | 80.4 [79.21(5)]    | 73.1                                    | 80.1 [80.32(9)]    |
| <i>N1</i> –Fe– <i>N3</i>              | 74.4 [74.6(2)]                                                       | 79.8  | 74.5                                                 | 80.4 [79.57(4)]    | 72.9                                    | 80.0 [80.68(9)]    |
| <i>N1</i> –Fe– <i>N4</i> ( <i>φ</i> ) | 180.0 [177.6(2)]                                                     | 180.0 | 178.9                                                | 180.0 [177.7(2)]   | 179.3                                   | 179.9 [177.08(10)] |
| <i>N1</i> –Fe– <i>N5</i>              | 105.6 [104.8(2)]                                                     | 100.2 | 104.7                                                | 99.6 [97.21(6)]    | 107.8                                   | 99.9 [99.33(9)]    |
| <i>N1</i> –Fe– <i>N6</i>              | 105.6 [106.9(2)]                                                     | 100.2 | 106.2                                                | 99.6 [101.47(8)]   | 106.4                                   | 100.0 [99.39(9)]   |
| <i>N2</i> –Fe– <i>N3</i>              | 148.8 [147.99(19)]                                                   | 159.5 | 149.1                                                | 160.8 [158.7(3)]   | 146.0                                   | 160.1 [160.98(10)] |
| <i>N2</i> –Fe– <i>N4</i>              | 105.6 [108.75(18)]                                                   | 100.2 | 106.2                                                | 99.6 [100.99(5)]   | 106.8                                   | 99.8 [102.60(10)]  |
| <i>N2</i> –Fe– <i>N5</i>              | 103.1 [101.61(18)]                                                   | 98.2  | 96.5                                                 | 91.6 [91.80(6)]    | 97.8                                    | 91.8 [91.41(9)]    |
| <i>N2</i> –Fe– <i>N6</i>              | 85.3 [88.89(18)]                                                     | 85.3  | 91.6                                                 | 91.6 [90.88(6)]    | 92.7                                    | 91.8 [91.40(9)]    |
| <i>N3</i> –Fe– <i>N4</i>              | 105.6 [103.25(18)]                                                   | 100.2 | 104.7                                                | 99.6 [100.26(8)]   | 107.3                                   | 100.2 [96.40(9)]   |
| <i>N3</i> –Fe– <i>N5</i>              | 85.3 [86.72(18)]                                                     | 85.4  | 91.7                                                 | 91.6 [92.05 (7)]   | 91.3                                    | 91.7 [90.94(9)]    |
| <i>N3</i> –Fe– <i>N6</i>              | 103.1 [100.14(18)]                                                   | 98.2  | 96.5                                                 | 91.6 [92.12(7)]    | 98.1                                    | 91.6 [92.41(9)]    |
| <i>N4</i> –Fe– <i>N5</i>              | 74.4 [73.94(17)]                                                     | 79.8  | 74.5                                                 | 80.4 [80.46(5)]    | 72.9                                    | 80.1 [80.51(9)]    |
| <i>N4</i> –Fe– <i>N6</i>              | 74.4 [74.34(17)]                                                     | 79.8  | 74.6                                                 | 80.4 [80.87(5)]    | 72.9                                    | 80.0 [80.81(9)]    |
| <i>N5</i> –Fe– <i>N6</i>              | 148.8 [148.28(16)]                                                   | 159.5 | 149.1                                                | 160.8 [161.3(4)]   | 145.8                                   | 160.1 [161.28(9)]  |
| <i>α</i>                              | 74.4 [74.1(4)]                                                       | 79.8  | 74.6                                                 | 80.4 [80.03(10)]   | 73.0                                    | 80.1 [80.58(18)]   |
| <i>φ</i>                              | 180.0 [177.6(2)]                                                     | 180.0 | 178.9                                                | 180.0 [177.7(2)]   | 179.3                                   | 179.9 [177.08(10)] |
| <i>θ</i>                              | 76.0 [73.38(4)]                                                      | 80.4  | 88.5                                                 | 90.0 [87.27]       | 87.6                                    | 90.0 [89.21(1)]    |

<sup>a</sup>Crystallographic data from **1**[BF<sub>4</sub>]<sub>2</sub>·MeCN (Table S2). <sup>c</sup>Crystallographic data from **1**[BF<sub>4</sub>]<sub>2</sub>·1.7MeNO<sub>2</sub>·0.3MeNO<sub>2</sub> (Table S2). <sup>e</sup>Crystallographic data from **2**[BF<sub>4</sub>]<sub>2</sub>·1.5MeCN (Table S4). <sup>d</sup>Crystallographic data from molecule D of **4**[BF<sub>4</sub>]<sub>2</sub>·1.39MeCN·0.125Et<sub>2</sub>O·0.25H<sub>2</sub>O (Figure S36, Table S7). <sup>f</sup>From ref. 25.

<sup>f</sup>Crystallographic data from ref. 23. <sup>g</sup>Crystallographic data from ref. 19.

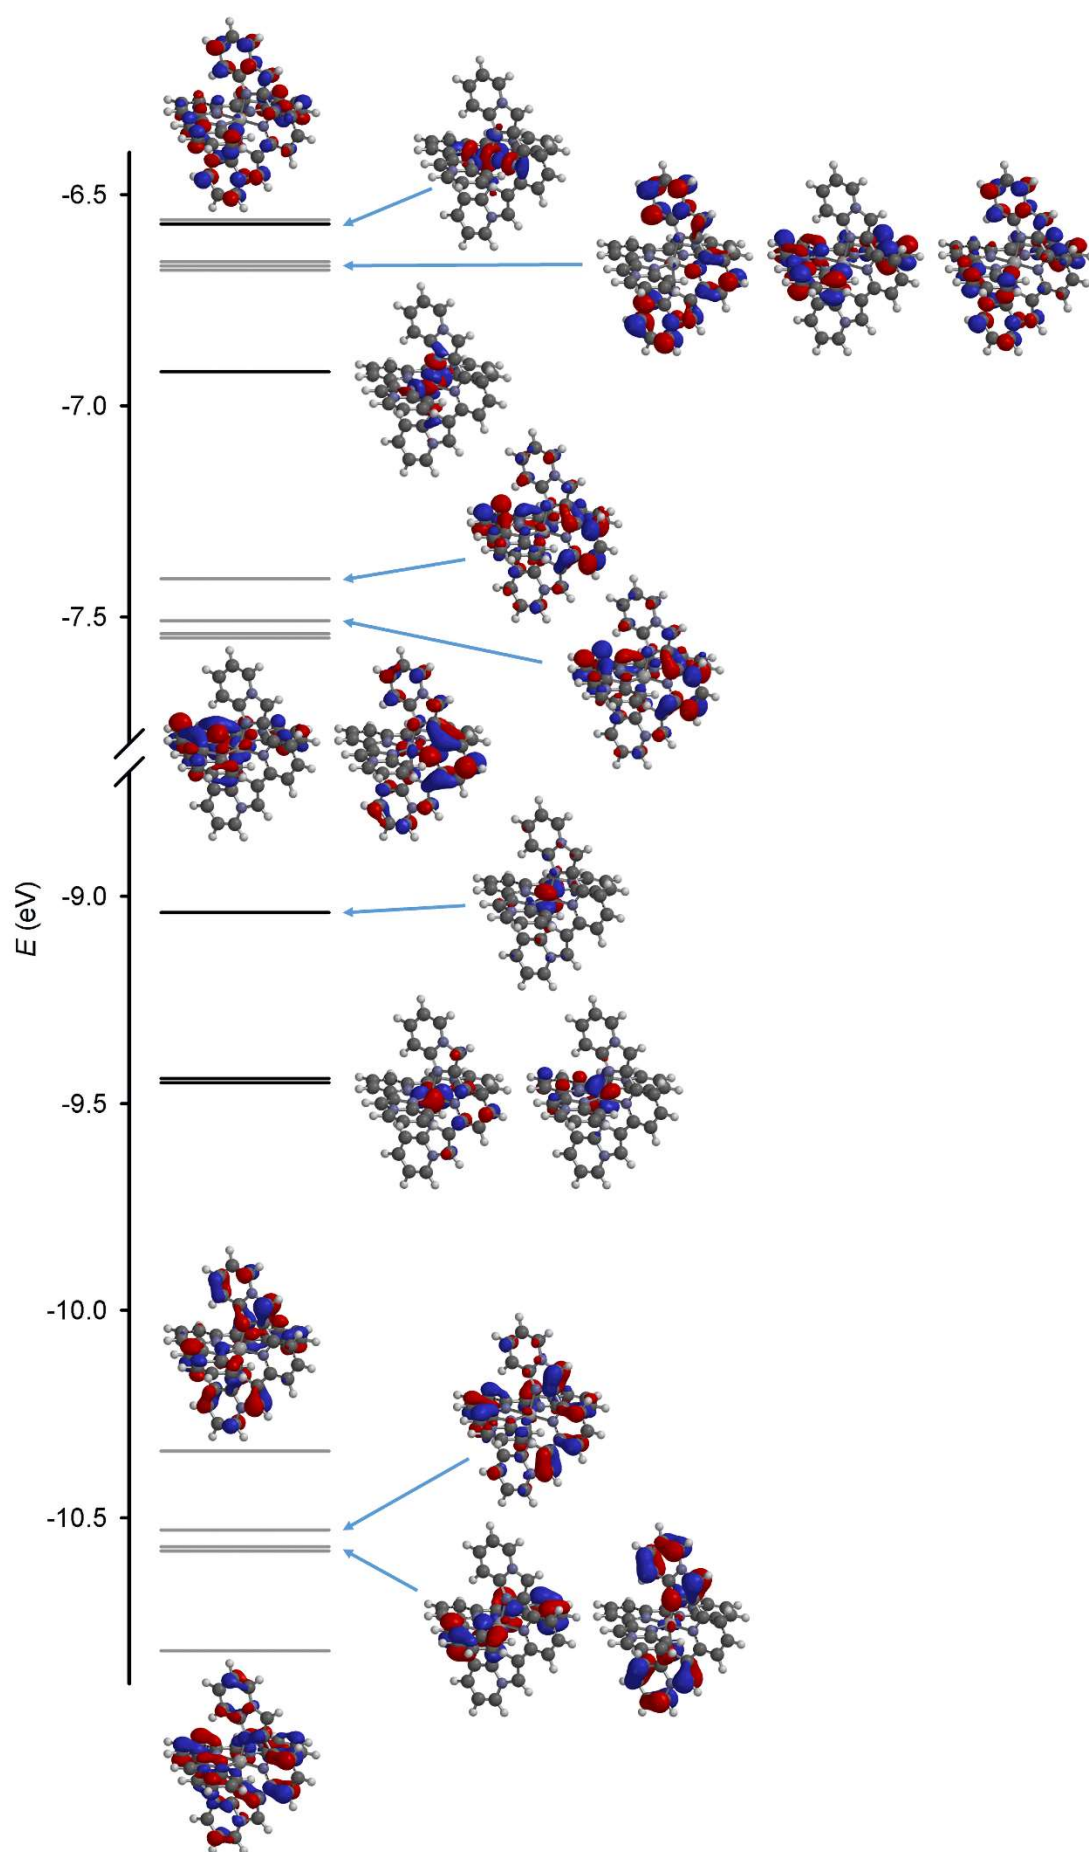

**Figure S44** Frontier orbital plots for  $12^+$ , colour-coded as: metal-centred  $d$ -orbitals (black); and ligand-based  $\pi$  or  $\pi^*$  MOs (grey). The  $d_{22}$  orbital is accidentally degenerate with a ligand-based  $\pi^*$  orbital in the diagram.

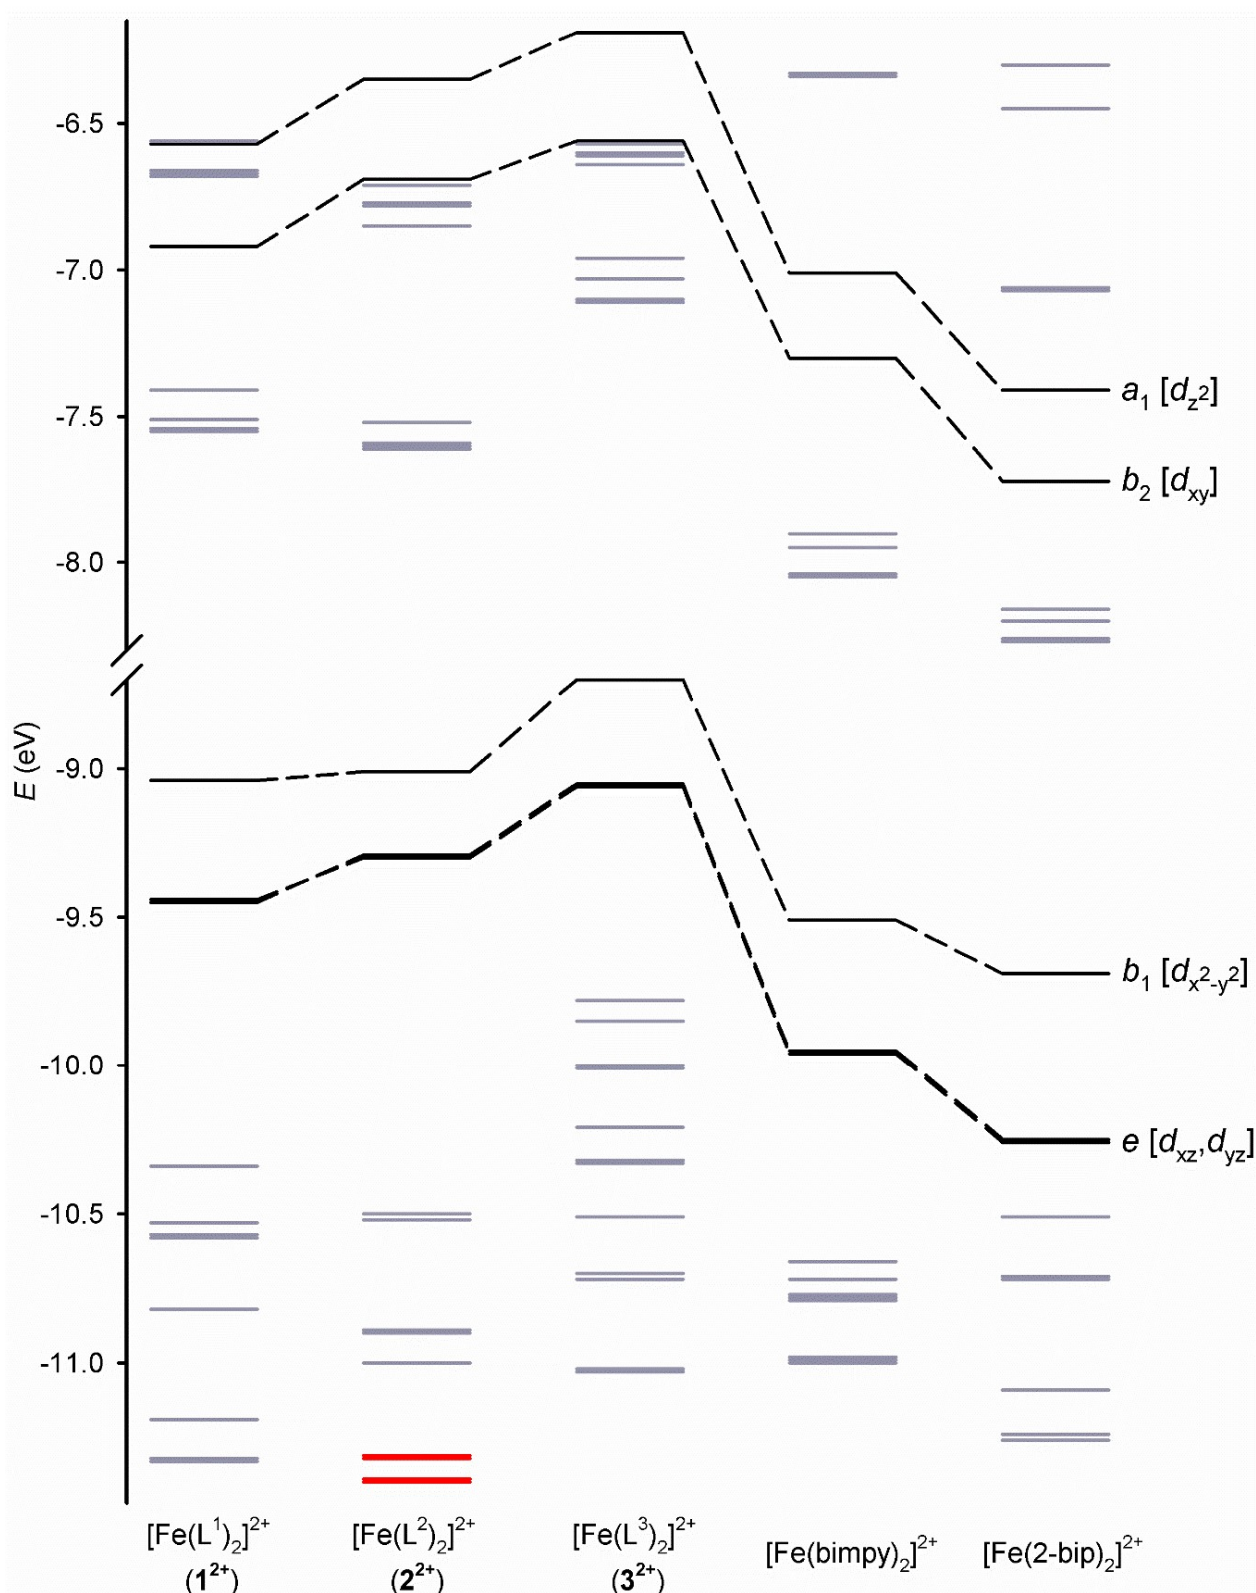

**Figure S45** Frontier molecular orbital energies of low-spin complexes in this work. Metal  $d$ -orbitals are in black, and ligand-centred orbitals are in grey; the red energy levels for  $2^{2+}$  are lone pairs from their peripheral N atoms. The  $d$ -orbitals have  $D_{2d}$  symmetry labels, which is the idealised point group of these molecules. Data for  $[\text{Fe}(\text{bimpy})_2]^{2+}$  are from ref. 24.

- $d_{zz}$  and  $d_{yz}$  report on out-of-plane  $\pi$ -bonding to the ligand pyridyl groups.
- $d_{y_2-y_2}$  reports on out-of-plane  $\pi$ -bonding to the distal ligand azolyl donors.
- $d_{z_2}$  and  $d_{xy}$  are  $\sigma^*$  antibonding with respect to the Fe–N bonds.

The interpretation of these data is discussed on page S66.



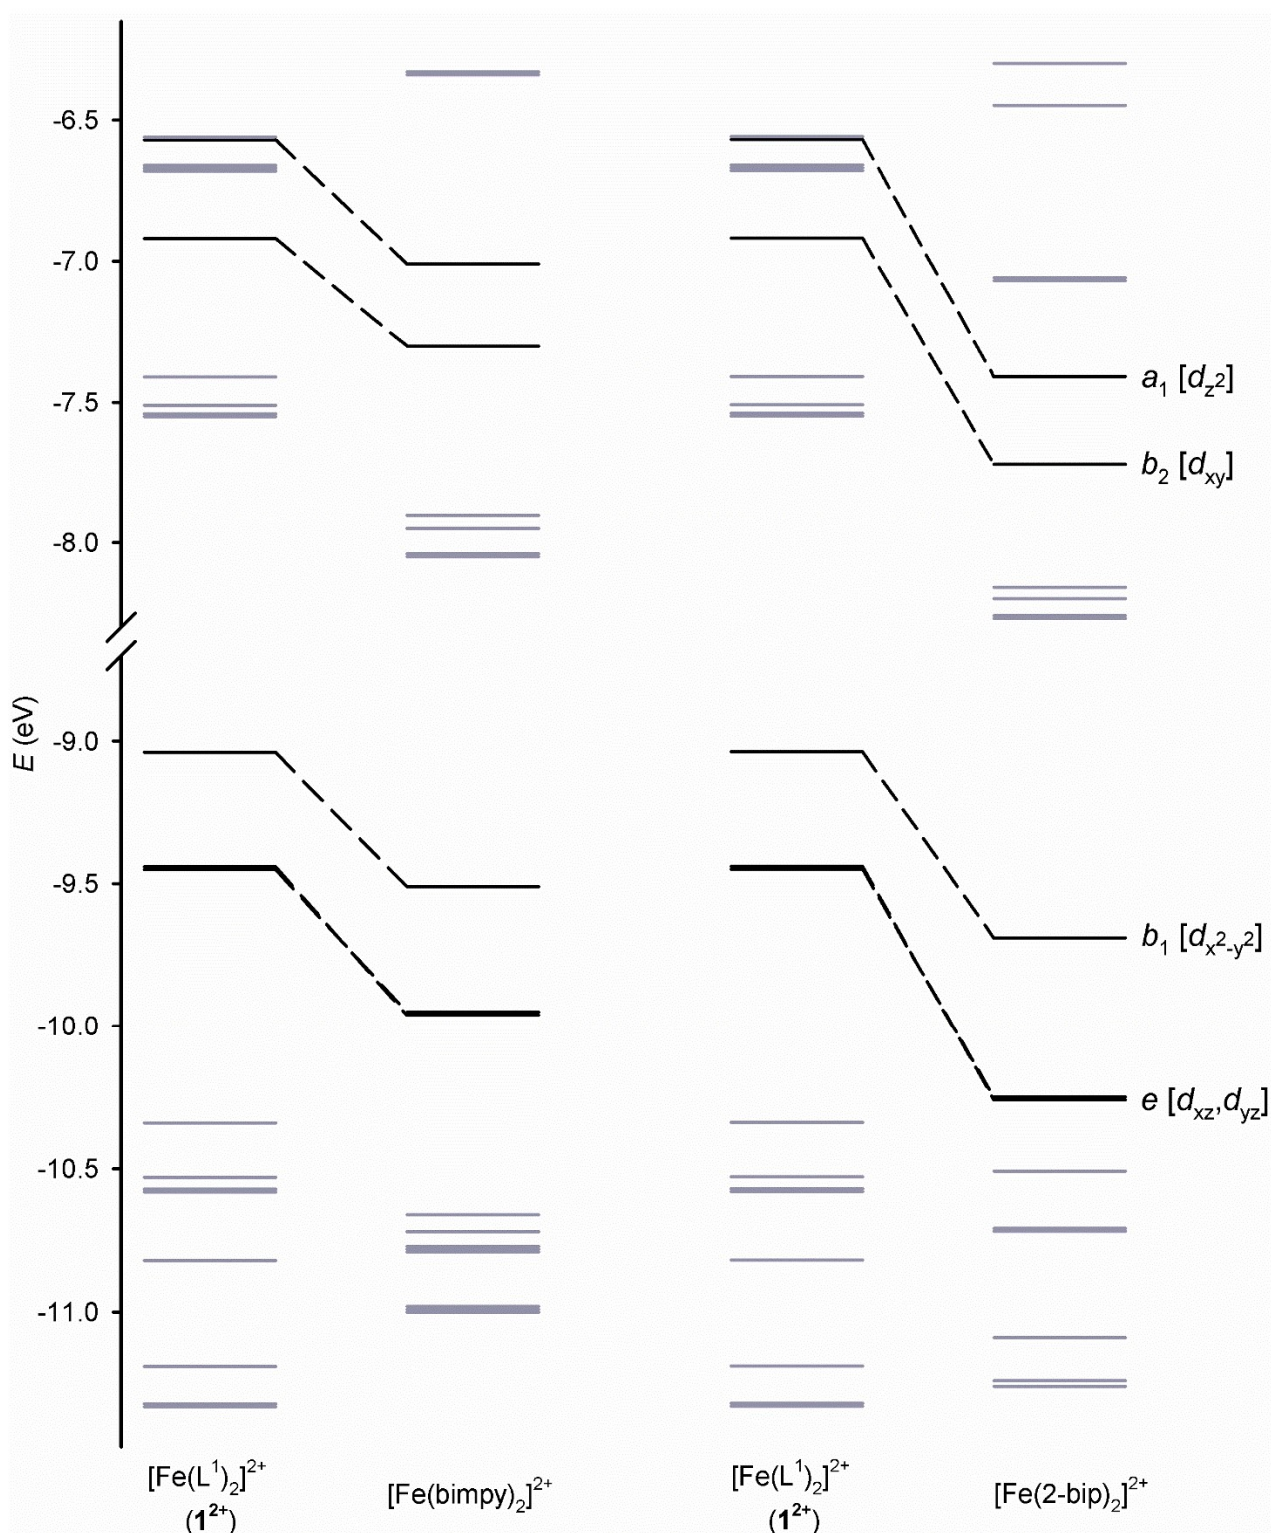

**Figure S46** Comparison of the FMO energies of the reference molecule  $1^{2+}$  with its constitutional isomers  $[\text{Fe}(\text{bimpy})_2]^{2+}$  and  $[\text{Fe}(2\text{-bip})_2]^{2+}$ . Details as for Figure S45.

The  $\pi^*$ -LUMOs for each complex in the Figures are similar in form (Figure S45), but the shapes of the high-lying  $\pi$ -orbitals show more variation between the complexes reflecting the different heterocycles present.

The interpretation of these data is discussed on the next page.

## Discussion of the frontier orbitals in the complexes (Figures S45 and S46)

The following discussion compares each complex against  $1^{2+}$ , which is the baseline standard for the  $\Delta E_{\text{rel}}\{\text{HS-LS}\}$  spin state energies (Table 4, main article).

- The  $\pi$ -bonding  $d$ -orbitals are all less destabilised than the  $\sigma$ -symmetry  $d$ -orbitals in  $2^{2+}$ , compared to  $1^{2+}$  (Figure S45). Hence, the positive  $\Delta E_{\text{rel}}\{\text{HS-LS}\}$  for  $2^{2+}$  reflects a comparatively stronger  $\pi$ -ligand field in that complex. That is consistent with the greater  $\pi$ -acidity of  $L^2$  predicted by the free ligand calculation (page S58).
- The  $d$ -orbitals of  $3^{2+}$  are all destabilised to a similar degree compared to  $1^{2+}$  (Figure S45), which is consistent with the near-zero  $\Delta E_{\text{rel}}\{\text{HS-LS}\}$  computed for  $3^{2+}$ . Hence, although it could not be experimentally confirmed,  $[\text{Fe}(L^3)_2]^{2+}$  is predicted to have similar spin state properties to  $1[\text{BF}_4]_2$ .
- The  $\pi$ -symmetry  $d$ -orbitals in  $[\text{Fe}(\text{bimpy})_2]^{2+}$  are more stabilised than  $d_{xy}$  and  $d_{z^2}$  in  $1^{2+}$  (Figure S46), implying its positive  $\Delta E_{\text{rel}}\{\text{HS-LS}\}$  is a function of stronger metal-ligand  $\pi$ -back bonding. That cannot be explained in so much detail as the other complexes, however, on the basis of this Figure.
- The  $d$ -orbitals in  $[\text{Fe}(2\text{-bip})_2]^{2+}$  are mostly stabilised by similar amounts compared to  $1^{2+}$  (Figure S46). Thus the weaker  $\sigma$ -basicity and greater  $\pi$ -acidity of 2-bip have almost equal but opposite effects on the ligand field of  $[\text{Fe}(2\text{-bip})_2]^{2+}$ . The slightly negative  $\Delta E_{\text{rel}}\{\text{HS-LS}\}$  for that complex reflects its less-stabilised  $d_{y^2-y^2}$  level, showing the imidazopyridyl groups in  $L^1$  and the indazol-2-yl donors in 2-bip have more similar  $\pi$ -donor character. These aspects are consistent with the free ligand calculations (Figure S42).

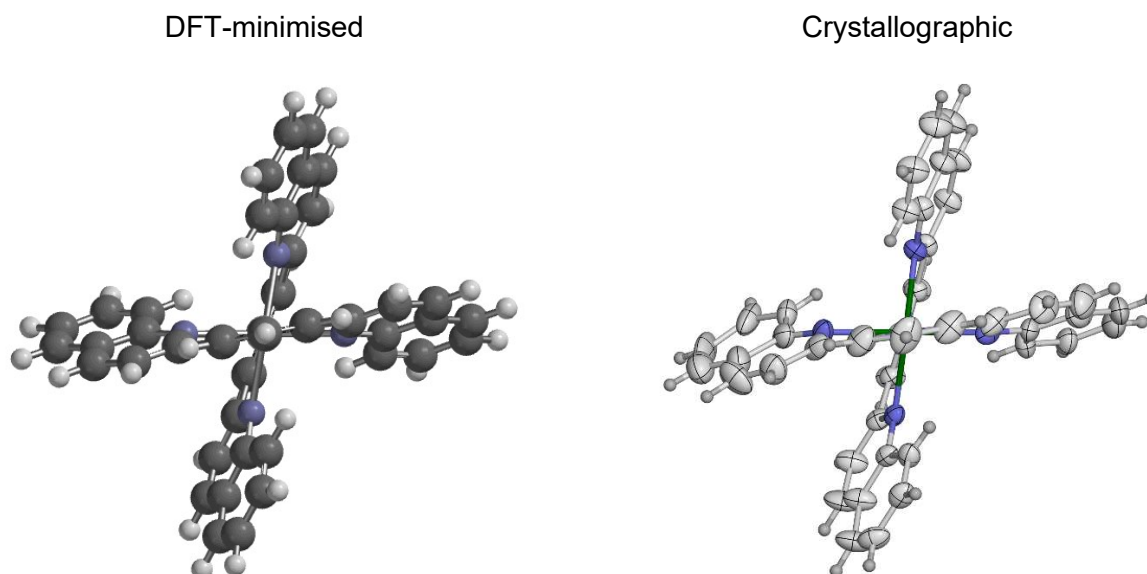

**Figure S47** Comparison of the computed and experimental high-spin molecular geometries of  $[\text{Fe}(L^4)_2]^{2+}$  ( $4^{2+}$ ). The view is the same as in Figures S26-S27. The crystallographic molecule is molecule D in the structure of  $4[\text{BF}_4]_2 \cdot 1.39\text{MeCN} \cdot 0.125\text{Et}_2\text{O} \cdot 0.25\text{H}_2\text{O}$  (Figure S24).

The pitch of the helical ligand conformation is expressed by the  $\theta$  parameter (page S13), which is  $76.0^\circ$  in the computed structure and  $73.38(4)^\circ$  in the crystallographic molecule shown.

The other molecules in the crystal structure of this complex show  $57.75(5) \leq \theta \leq 73.38(4)^\circ$  (Table S7), so experimentally the degree of helical canting in  $[\text{Fe}(L^4)_2]^{2+}$  influenced by crystal packing. However, the calculation shows the preference for a helical ligand conformation is not a packing effect, and is intrinsic to the molecule.

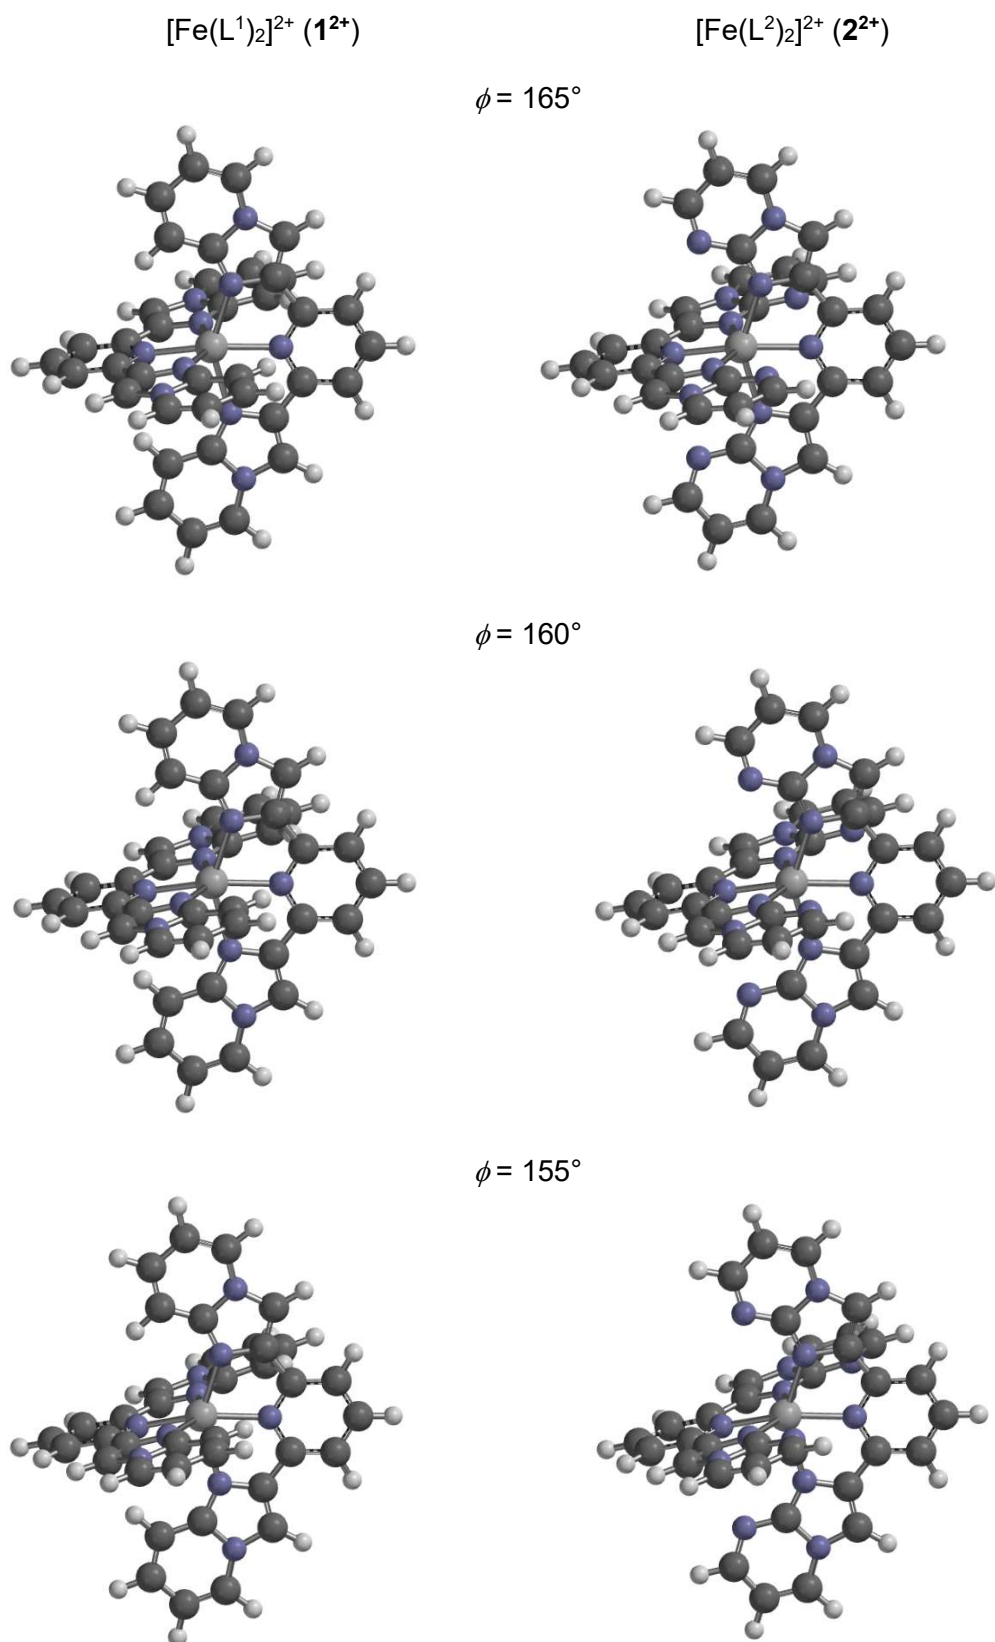

**Figure S48** Energy-minimised structures of the distorted coordination geometries of high-spin  $1^{2+}$  and  $2^{2+}$  in the gas phase. The undistorted minimisations of these molecules are shown in Figure S43, and  $\phi$  is defined on page S13.

Colour code: C, dark grey; H, white; N, blue; Fe, pale grey.

**Table S13** Computed metric parameters for the distorted coordination geometries of high-spin  $1^{2+}$  and  $2^{2+}$  (Å, deg; Figure S48). The atom numbering is the same as in Table S12 (Figure S43). The undistorted molecules in Table S12 are included again here, to aid comparison. Where available, crystallographic values are also given in square brackets for comparison.  $\alpha$  is the average ligand bite angle in the molecule; see page S13 for definitions of  $\phi$  and  $\theta$ .

| $\phi$                      | $[\text{Fe}(\text{L}^1)_2]^{2+}$ ( $1^{2+}$ ) |                    |                    |                    | $[\text{Fe}(\text{L}^2)_2]^{2+}$ ( $2^{2+}$ ) |                    |                    |                    |
|-----------------------------|-----------------------------------------------|--------------------|--------------------|--------------------|-----------------------------------------------|--------------------|--------------------|--------------------|
|                             | 180                                           | 165.0 <sup>a</sup> | 160.0 <sup>a</sup> | 155.0 <sup>a</sup> | 180                                           | 165.0 <sup>a</sup> | 160.0 <sup>a</sup> | 155.0 <sup>a</sup> |
| Fe–N1                       | 2.167 [2.175(3)]                              | 2.164              | 2.162              | 2.161              | 2.164                                         | 2.170 [2.148(2)]   | 2.170              | 2.173 [2.160(3)]   |
| Fe–N2                       | 2.228 [2.199(4)]                              | 2.191              | 2.177              | 2.162              | 2.204                                         | 2.175 [2.193(2)]   | 2.164              | 2.153 [2.209(3)]   |
| Fe–N3                       | 2.228 [2.191(3)]                              | 2.273              | 2.304              | 2.334              | 2.204                                         | 2.241 [2.183(2)]   | 2.259              | 2.281 [2.203(3)]   |
| Fe–N4                       | 2.167 [2.175(3)]                              | 2.164              | 2.162              | 2.163              | 2.164                                         | 2.170 [2.154(2)]   | 2.170              | 2.173 [2.162(3)]   |
| Fe–N5                       | 2.228 [2.199(3)]                              | 2.273              | 2.304              | 2.341              | 2.204                                         | 2.241 [2.197(2)]   | 2.259              | 2.281 [2.212(3)]   |
| Fe–N6                       | 2.228 [2.191(4)]                              | 2.191              | 2.177              | 2.162              | 2.204                                         | 2.175 [2.201(2)]   | 2.164              | 2.153 [2.196(3)]   |
| Fe–N{pyridyl} <sub>av</sub> | 2.167 [2.175(3)]                              | 2.164              | 2.162              | 2.162              | 2.164                                         | 2.170 [2.151(3)]   | 2.170              | 2.173 [2.161]      |
| Fe–N{distal} <sub>av</sub>  | 2.228 [2.195(5)]                              | 2.232              | 2.241              | 2.248              | 2.204                                         | 2.208 [2.182(4)]   | 2.212              | 2.217 [2.205]      |
| N1–Fe–N2                    | 74.6 [73.84(13)]                              | 75.5               | 76.0               | 76.5               | 74.6                                          | 75.2 [74.78(9)]    | 75.4               | 75.7 [74.54(12)]   |
| N1–Fe–N3                    | 74.6 [74.41(12)]                              | 73.9               | 73.5               | 72.9               | 74.6                                          | 73.7 [74.57(9)]    | 73.3               | 72.8 [74.36(12)]   |
| N1–Fe–N4                    | 180.0 [176.42(18)]                            | 165.0              | 160.0              | 155.0              | 180.0                                         | 165.0 [163.52(9)]  | 160.0              | 155.0 [156.26(12)] |
| N1–Fe–N5                    | 105.4 [108.75(12)]                            | 95.3               | 92.2               | 88.7               | 105.4                                         | 95.5 [120.61(9)]   | 92.3               | 89.1 [89.15(12)]   |
| N1–Fe–N6                    | 105.4 [103.08(12)]                            | 115.5              | 118.6              | 121.9              | 105.4                                         | 115.7 [90.12(9)]   | 119.0              | 122.4 [122.64(13)] |
| N2–Fe–N3                    | 149.2 [148.15(12)]                            | 149.2              | 149.1              | 148.8              | 149.1                                         | 148.7 [148.43(9)]  | 148.5              | 148.2 [148.29(13)] |
| N2–Fe–N4                    | 105.4 [108.75(12)]                            | 115.5              | 118.6              | 121.7              | 105.4                                         | 115.7 [110.48(9)]  | 119.0              | 122.4 [121.03(13)] |
| N2–Fe–N5                    | 95.9 [93.03(19)]                              | 96.5               | 96.4               | 97.2               | 96.2                                          | 96.1 [98.12(9)]    | 96.0               | 96.2 [91.12(12)]   |
| N2–Fe–N6                    | 92.2 [94.79(13)]                              | 93.2               | 94.1               | 95.2               | 91.9                                          | 94.6 [91.67(9)]    | 95.5               | 96.3 [100.68(12)]  |
| N3–Fe–N4                    | 105.4 [103.08(12)]                            | 95.3               | 92.2               | 89.2               | 105.4                                         | 95.5 [101.07(9)]   | 92.3               | 89.1 [90.43(13)]   |
| N3–Fe–N5                    | 92.2 [94.79(13)]                              | 89.9               | 89.2               | 87.6               | 91.9                                          | 89.9 [90.99(9)]    | 89.4               | 88.4 [94.47(13)]   |
| N3–Fe–N6                    | 95.9 [94.64(19)]                              | 96.5               | 96.4               | 96.2               | 96.2                                          | 96.1 [95.79(9)]    | 96.0               | 96.2 [90.88(12)]   |
| N4–Fe–N5                    | 74.6 [73.84(13)]                              | 73.9               | 73.5               | 72.9               | 74.6                                          | 73.7 [74.86(9)]    | 73.3               | 72.8 [73.69(12)]   |
| N4–Fe–N6                    | 74.6 [74.41(12)]                              | 75.5               | 76.0               | 76.4               | 74.6                                          | 75.2 [74.35(9)]    | 75.4               | 75.7 [74.69(12)]   |
| N5–Fe–N6                    | 149.2 [148.15(12)]                            | 149.2              | 149.1              | 149.0              | 149.1                                         | 148.7 [149.19(9)]  | 148.5              | 148.2 [147.95(13)] |
| $\alpha$                    | 74.6 [74.13(18)]                              | 74.7               | 74.8               | 74.7               | 74.6                                          | 74.5 [74.64(18)]   | 74.3               | 74.3 [74.3]        |
| $\phi$                      | 180.0 [176.42(18)]                            | 165.0              | 160.0              | 155.0              | 180.0                                         | 165.0 [163.52(9)]  | 160.0              | 155.0 [156.26(12)] |
| $\theta$                    | 89.2 [89.66(3)]                               | 86.1               | 84.8               | 82.7               | 89.2                                          | 86.8 [87.59(3)]    | 85.2               | 82.7 [88.37(2)]    |

<sup>a</sup>Fixed during the minimisation process.

**Table S14** Atomic coordinates for the DFT-minimised molecules.L<sup>1</sup> (cisoid conformation).

|    |   |           |           |           |
|----|---|-----------|-----------|-----------|
| 1  | H | 3.544092  | -0.298040 | -2.968170 |
| 2  | C | 2.702499  | -0.227498 | -2.263319 |
| 3  | N | 0.543137  | -0.048949 | -0.479029 |
| 4  | C | 2.172740  | 1.021719  | -1.913908 |
| 5  | C | 2.141444  | -1.386316 | -1.711014 |
| 6  | C | 1.053761  | -1.251433 | -0.810754 |
| 7  | C | 1.079974  | 1.066982  | -1.010549 |
| 8  | H | 2.591154  | 1.941036  | -2.346162 |
| 9  | H | 2.534358  | -2.375680 | -1.982634 |
| 10 | C | 0.479156  | 2.364499  | -0.610873 |
| 11 | N | -0.677780 | 2.443000  | 0.119496  |
| 12 | C | -0.914256 | 3.743644  | 0.288712  |
| 13 | N | 0.098171  | 4.537605  | -0.334663 |
| 14 | C | 0.980850  | 3.647408  | -0.906004 |
| 15 | H | 1.869347  | 3.991844  | -1.441681 |
| 16 | C | 0.431757  | -2.445981 | -0.185862 |
| 17 | C | 0.880466  | -3.777466 | -0.288648 |
| 18 | N | 0.001197  | -4.529961 | 0.458749  |
| 19 | C | -0.958013 | -3.608927 | 0.984156  |
| 20 | N | -0.691542 | -2.362597 | 0.594791  |
| 21 | H | 1.728847  | -4.237208 | -0.802613 |
| 22 | C | 0.078920  | 5.917100  | -0.294113 |
| 23 | C | -0.951437 | 6.557665  | 0.364822  |
| 24 | C | -1.988714 | 5.804474  | 1.000345  |
| 25 | C | -1.969467 | 4.417481  | 0.962393  |
| 26 | H | 0.902613  | 6.438471  | -0.799768 |
| 27 | H | -0.960007 | 7.655401  | 0.392350  |
| 28 | H | -2.800676 | 6.332382  | 1.519708  |
| 29 | H | -2.743453 | 3.801028  | 1.437386  |
| 30 | C | -1.999342 | -4.126434 | 1.802119  |
| 31 | C | -2.056500 | -5.487125 | 2.067736  |
| 32 | C | -1.072423 | -6.370742 | 1.522432  |
| 33 | C | -0.056012 | -5.882948 | 0.725458  |
| 34 | H | -2.732711 | -3.414230 | 2.201741  |
| 35 | H | -2.858341 | -5.893312 | 2.700032  |
| 36 | H | -1.111286 | -7.448343 | 1.729878  |
| 37 | H | 0.727479  | -6.508547 | 0.277459  |

L<sup>2</sup> (cisoid conformation).

|    |   |           |           |           |
|----|---|-----------|-----------|-----------|
| 1  | H | 4.317780  | 0.107318  | -1.108205 |
| 2  | C | 3.252863  | 0.081732  | -0.834219 |
| 3  | N | 0.539011  | 0.016629  | -0.122018 |
| 4  | C | 2.503370  | 1.264379  | -0.788118 |
| 5  | C | 2.630724  | -1.133257 | -0.519360 |
| 6  | C | 1.258625  | -1.120899 | -0.159915 |
| 7  | C | 1.133484  | 1.185635  | -0.428814 |
| 8  | H | 2.977619  | 2.229206  | -1.014923 |
| 9  | H | 3.203723  | -2.070301 | -0.547798 |
| 10 | C | 0.289230  | 2.406513  | -0.376785 |
| 11 | N | -0.976943 | 2.393637  | 0.141209  |
| 12 | C | -1.436080 | 3.635656  | 0.030151  |
| 13 | N | -0.436416 | 4.491559  | -0.583635 |

|    |   |           |           |           |
|----|---|-----------|-----------|-----------|
| 14 | C | 0.650584  | 3.692057  | -0.832391 |
| 15 | H | 1.554164  | 4.081778  | -1.310064 |
| 16 | C | 0.553495  | -2.378996 | 0.194694  |
| 17 | C | 1.101453  | -3.678987 | 0.167897  |
| 18 | N | 0.091280  | -4.515013 | 0.570594  |
| 19 | C | -1.056643 | -3.664895 | 0.833647  |
| 20 | N | -0.753138 | -2.392481 | 0.600720  |
| 21 | H | 2.090681  | -4.059867 | -0.101413 |
| 22 | C | -0.699493 | 5.820792  | -0.802225 |
| 23 | C | -1.933990 | 6.307625  | -0.417218 |
| 24 | C | -2.873094 | 5.412343  | 0.185798  |
| 25 | N | -2.633175 | 4.125024  | 0.401748  |
| 26 | H | 0.089862  | 6.423898  | -1.272699 |
| 27 | H | -2.182219 | 7.365071  | -0.574873 |
| 28 | H | -3.861395 | 5.792591  | 0.497536  |
| 29 | N | -2.224370 | -4.187499 | 1.250941  |
| 30 | C | -2.294977 | -5.502899 | 1.411615  |
| 31 | C | -1.203358 | -6.395114 | 1.168153  |
| 32 | C | 0.003052  | -5.873950 | 0.741271  |
| 33 | H | -3.261989 | -5.910194 | 1.754376  |
| 34 | H | -1.313881 | -7.476979 | 1.316516  |
| 35 | H | 0.900160  | -6.472116 | 0.527808  |

L<sup>3</sup> (cisoid conformation).

|    |   |           |           |           |
|----|---|-----------|-----------|-----------|
| 1  | H | 4.262404  | -0.196122 | -1.729901 |
| 2  | C | 3.245138  | -0.148448 | -1.314113 |
| 3  | N | 0.651921  | -0.027075 | -0.248811 |
| 4  | C | 2.604747  | 1.086220  | -1.147634 |
| 5  | C | 2.576509  | -1.321574 | -0.940725 |
| 6  | C | 1.265912  | -1.215895 | -0.408063 |
| 7  | C | 1.294318  | 1.103211  | -0.604182 |
| 8  | H | 3.114520  | 2.016478  | -1.433453 |
| 9  | H | 3.067781  | -2.297540 | -1.055627 |
| 10 | C | 0.569531  | 2.382248  | -0.401559 |
| 11 | N | -0.699182 | 2.433211  | 0.123018  |
| 12 | C | -1.025429 | 3.721724  | 0.158584  |
| 13 | N | 0.020755  | 4.538521  | -0.340701 |
| 14 | C | 1.036280  | 3.674282  | -0.697042 |
| 15 | H | 1.979194  | 4.030516  | -1.116174 |
| 16 | C | 0.512163  | -2.426599 | 0.001659  |
| 17 | C | 0.918653  | -3.763419 | -0.147150 |
| 18 | N | -0.098902 | -4.533260 | 0.379287  |
| 19 | C | -1.084419 | -3.617704 | 0.828280  |
| 20 | N | -0.721316 | -2.358646 | 0.602983  |
| 21 | H | 1.818348  | -4.207004 | -0.577609 |
| 22 | C | -0.073202 | 5.935607  | -0.415105 |
| 23 | C | -1.292273 | 6.541214  | 0.040069  |
| 24 | C | -2.360516 | 5.712404  | 0.551896  |
| 25 | C | -2.230881 | 4.344309  | 0.609905  |
| 26 | H | -3.282946 | 6.201949  | 0.895565  |
| 27 | H | -3.022768 | 3.688074  | 0.992794  |
| 28 | C | -2.273309 | -4.127883 | 1.436842  |
| 29 | C | -2.444008 | -5.485326 | 1.578948  |
| 30 | C | -1.437943 | -6.415301 | 1.117563  |
| 31 | C | -0.239386 | -5.923198 | 0.500301  |

|    |   |           |           |           |
|----|---|-----------|-----------|-----------|
| 32 | H | -3.018554 | -3.396533 | 1.774640  |
| 33 | H | -3.353739 | -5.888592 | 2.046301  |
| 34 | C | -1.397972 | 7.957107  | -0.034091 |
| 35 | H | -2.329159 | 8.429200  | 0.312951  |
| 36 | C | 0.979941  | 6.734614  | -0.917168 |
| 37 | H | 1.910260  | 6.265966  | -1.263498 |
| 38 | C | 0.750014  | -6.822351 | 0.039825  |
| 39 | H | 1.664487  | -6.441466 | -0.433207 |
| 40 | C | -1.587733 | -7.823036 | 1.249416  |
| 41 | H | -2.504045 | -8.207511 | 1.721687  |
| 42 | C | -0.607144 | -8.705478 | 0.794768  |
| 43 | H | -0.745386 | -9.790245 | 0.907823  |
| 44 | C | 0.565235  | -8.200343 | 0.186919  |
| 45 | H | 1.340644  | -8.891348 | -0.174252 |
| 46 | C | -0.355961 | 8.740439  | -0.531702 |
| 47 | H | -0.461428 | 9.833711  | -0.579180 |
| 48 | C | 0.837243  | 8.124122  | -0.974208 |
| 49 | H | 1.661602  | 8.736767  | -1.366870 |

L<sup>4</sup> (cisoid conformation).

|    |   |           |           |           |
|----|---|-----------|-----------|-----------|
| 1  | H | 3.610586  | -0.628900 | -3.704701 |
| 2  | C | 2.847644  | -0.496617 | -2.923748 |
| 3  | N | 0.912312  | -0.160038 | -0.938417 |
| 4  | C | 2.256444  | 0.756594  | -2.718881 |
| 5  | C | 2.459307  | -1.579874 | -2.125087 |
| 6  | C | 1.473422  | -1.368140 | -1.126660 |
| 7  | C | 1.276611  | 0.886636  | -1.700675 |
| 8  | H | 2.561499  | 1.605979  | -3.342808 |
| 9  | H | 2.918886  | -2.562856 | -2.287596 |
| 10 | C | 0.595277  | 2.202447  | -1.415224 |
| 11 | C | -0.704360 | 4.617165  | -0.830866 |
| 12 | C | 0.884152  | 3.378194  | -2.191611 |
| 13 | N | -0.284045 | 2.222469  | -0.415031 |
| 14 | C | -0.928697 | 3.382923  | -0.110198 |
| 15 | C | 0.238672  | 4.567566  | -1.898407 |
| 16 | H | 1.607324  | 3.350313  | -3.016424 |
| 17 | H | 0.447260  | 5.476683  | -2.483063 |
| 18 | C | 0.999078  | -2.482652 | -0.226447 |
| 19 | C | 0.073798  | -4.507022 | 1.477380  |
| 20 | N | 0.046155  | -2.182433 | 0.653915  |
| 21 | C | 1.555359  | -3.806176 | -0.317832 |
| 22 | C | 1.094215  | -4.801546 | 0.526971  |
| 23 | C | -0.421371 | -3.148001 | 1.493196  |
| 24 | H | 2.341914  | -4.041671 | -1.045653 |
| 25 | H | 1.508410  | -5.819926 | 0.472292  |
| 26 | C | -1.867452 | 3.379424  | 0.970203  |
| 27 | C | -2.546928 | 4.539793  | 1.316908  |
| 28 | C | -2.321818 | 5.753573  | 0.604314  |
| 29 | C | -1.417661 | 5.792709  | -0.450574 |
| 30 | H | -2.019237 | 2.428898  | 1.500117  |
| 31 | H | -3.266982 | 4.527615  | 2.148682  |
| 32 | H | -2.869288 | 6.662573  | 0.893850  |
| 33 | H | -1.240904 | 6.728301  | -1.003178 |
| 34 | C | -1.445839 | -2.800928 | 2.430428  |
| 35 | C | -1.950714 | -3.753084 | 3.306104  |

|    |   |           |           |          |
|----|---|-----------|-----------|----------|
| 36 | C | -1.459566 | -5.091061 | 3.286393 |
| 37 | C | -0.465367 | -5.462654 | 2.388864 |
| 38 | H | -1.803802 | -1.762132 | 2.421553 |
| 39 | H | -2.737462 | -3.477903 | 4.024292 |
| 40 | H | -1.873074 | -5.831130 | 3.987280 |
| 41 | H | -0.083760 | -6.495111 | 2.370337 |

bimpy (cisoid conformation; from ref. 24).

|    |   |           |           |           |
|----|---|-----------|-----------|-----------|
| 1  | N | 0.000000  | 0.000000  | 0.616630  |
| 2  | C | -1.162256 | -0.001972 | 1.295402  |
| 3  | C | -1.207796 | -0.004410 | 2.715171  |
| 4  | C | 0.000000  | 0.000000  | 3.423601  |
| 5  | H | 0.000000  | 0.000000  | 4.523193  |
| 6  | C | 1.207796  | 0.004410  | 2.715171  |
| 7  | H | 2.157040  | 0.010453  | 3.269501  |
| 8  | C | 1.162256  | 0.001972  | 1.295402  |
| 9  | C | -2.401316 | -0.000115 | 0.484491  |
| 10 | N | -2.457993 | -0.006753 | -0.840925 |
| 11 | C | -3.802588 | -0.003695 | -1.152830 |
| 12 | C | -4.597145 | 0.007517  | 0.040975  |
| 13 | N | -3.671817 | 0.010541  | 1.067644  |
| 14 | C | 2.401316  | 0.000115  | 0.484491  |
| 15 | N | 2.457993  | 0.006753  | -0.840925 |
| 16 | C | 3.802588  | 0.003695  | -1.152830 |
| 17 | C | 4.597145  | -0.007517 | 0.040975  |
| 18 | N | 3.671817  | -0.010541 | 1.067644  |
| 19 | H | -2.157040 | -0.010453 | 3.269501  |
| 20 | H | 6.606369  | -0.022469 | 0.935553  |
| 21 | C | 6.004024  | -0.013576 | 0.015575  |
| 22 | C | 4.441399  | 0.009088  | -2.414480 |
| 23 | H | 3.839625  | 0.017665  | -3.333746 |
| 24 | H | 7.707593  | -0.012782 | -1.317976 |
| 25 | C | 6.609758  | -0.008104 | -1.249760 |
| 26 | C | 5.840774  | 0.003035  | -2.444729 |
| 27 | H | 6.362693  | 0.006657  | -3.412873 |
| 28 | H | -3.839625 | -0.017665 | -3.333746 |
| 29 | C | -4.441399 | -0.009088 | -2.414480 |
| 30 | C | -6.004024 | 0.013576  | 0.015575  |
| 31 | H | -6.606369 | 0.022468  | 0.935553  |
| 32 | C | -6.609758 | 0.008104  | -1.249760 |
| 33 | H | -7.707593 | 0.012782  | -1.317976 |
| 34 | H | -6.362693 | -0.006657 | -3.412873 |
| 35 | C | -5.840774 | -0.003035 | -2.444729 |
| 36 | H | -3.890065 | 0.023954  | 2.061296  |
| 37 | H | 3.890065  | -0.023954 | 2.061296  |

2-bip (cisoid conformation).

|   |   |           |          |          |
|---|---|-----------|----------|----------|
| 1 | H | 0.000000  | 0.000000 | 4.685392 |
| 2 | C | 0.000000  | 0.000000 | 3.586014 |
| 3 | N | 0.000000  | 0.000000 | 0.800580 |
| 4 | C | 1.216129  | 0.000000 | 2.888897 |
| 5 | C | -1.216129 | 0.000000 | 2.888897 |



|    |   |           |          |           |
|----|---|-----------|----------|-----------|
| 6  | C | -1.148831 | 0.000000 | 1.477108  |
| 7  | C | 1.148831  | 0.000000 | 1.477108  |
| 8  | H | 2.166354  | 0.000000 | 3.434641  |
| 9  | H | -2.166354 | 0.000000 | 3.434641  |
| 10 | N | -2.345945 | 0.000000 | 0.689132  |
| 11 | N | 2.345945  | 0.000000 | 0.689132  |
| 12 | N | -2.258693 | 0.000000 | -0.661896 |
| 13 | N | 2.258693  | 0.000000 | -0.661896 |
| 14 | C | -3.543396 | 0.000000 | -1.075507 |
| 15 | C | -3.643177 | 0.000000 | 1.168140  |
| 16 | H | -3.880366 | 0.000000 | 2.233859  |
| 17 | C | -4.474235 | 0.000000 | 0.040821  |
| 18 | C | 3.543396  | 0.000000 | -1.075507 |
| 19 | C | 3.643177  | 0.000000 | 1.168140  |
| 20 | H | 3.880366  | 0.000000 | 2.233859  |
| 21 | C | 4.474235  | 0.000000 | 0.040821  |
| 22 | C | -4.023495 | 0.000000 | -2.419729 |
| 23 | H | -3.311684 | 0.000000 | -3.256484 |
| 24 | C | -5.396137 | 0.000000 | -2.615569 |
| 25 | H | -5.797999 | 0.000000 | -3.639715 |
| 26 | C | -6.319051 | 0.000000 | -1.513367 |
| 27 | H | -7.398042 | 0.000000 | -1.727974 |
| 28 | C | -5.882646 | 0.000000 | -0.196673 |
| 29 | H | -6.598450 | 0.000000 | 0.638325  |
| 30 | C | 4.023495  | 0.000000 | -2.419729 |
| 31 | H | 3.311684  | 0.000000 | -3.256484 |
| 32 | C | 5.396137  | 0.000000 | -2.615569 |
| 33 | H | 5.797999  | 0.000000 | -3.639715 |
| 34 | C | 6.319051  | 0.000000 | -1.513367 |
| 35 | H | 7.398042  | 0.000000 | -1.727974 |
| 36 | C | 5.882646  | 0.000000 | -0.196673 |
| 37 | H | 6.598450  | 0.000000 | 0.638325  |

$[\text{Fe}(\text{L}^1)_2]^{2+} (\mathbf{1}^{2+})$ , high-spin,  $\phi = 180^\circ$ .

|    |    |           |           |          |
|----|----|-----------|-----------|----------|
| 1  | Fe | 0.000000  | 0.000000  | 0.000001 |
| 2  | N  | 0.000000  | 0.000000  | 2.167255 |
| 3  | C  | -0.851380 | -0.817159 | 2.841620 |
| 4  | C  | -0.879415 | -0.839242 | 4.251113 |
| 5  | C  | 0.000000  | 0.000000  | 4.955950 |
| 6  | H  | 0.000000  | 0.000000  | 6.054996 |
| 7  | C  | 0.879415  | 0.839243  | 4.251112 |
| 8  | H  | 1.573094  | 1.500665  | 4.787070 |
| 9  | C  | 0.851379  | 0.817159  | 2.841620 |
| 10 | C  | -1.691136 | -1.638185 | 1.959825 |
| 11 | N  | -1.544786 | -1.492508 | 0.591061 |
| 12 | C  | -2.406656 | -2.360096 | 0.021791 |
| 13 | N  | -3.107700 | -3.061983 | 1.027165 |
| 14 | C  | -2.654212 | -2.601873 | 2.251782 |
| 15 | H  | -3.043799 | -2.992478 | 3.195486 |
| 16 | C  | 1.691136  | 1.638185  | 1.959824 |
| 17 | N  | 1.544786  | 1.492508  | 0.591061 |
| 18 | C  | 2.406656  | 2.360096  | 0.021791 |
| 19 | N  | 3.107701  | 3.061983  | 1.027165 |
| 20 | C  | 2.654212  | 2.601874  | 2.251782 |
| 21 | H  | 3.043799  | 2.992478  | 3.195486 |

|    |   |           |           |           |
|----|---|-----------|-----------|-----------|
| 22 | N | 0.000000  | 0.000000  | -2.167254 |
| 23 | C | 0.851380  | -0.817159 | -2.841619 |
| 24 | C | 0.879415  | -0.839242 | -4.251112 |
| 25 | H | 1.573094  | -1.500664 | -4.787070 |
| 26 | C | 0.000000  | 0.000000  | -4.955950 |
| 27 | H | 0.000000  | 0.000000  | -6.054996 |
| 28 | C | -0.879415 | 0.839242  | -4.251112 |
| 29 | C | -0.851380 | 0.817159  | -2.841619 |
| 30 | C | 1.691136  | -1.638185 | -1.959824 |
| 31 | N | 1.544786  | -1.492508 | -0.591061 |
| 32 | C | 2.406657  | -2.360097 | -0.021791 |
| 33 | N | 3.107701  | -3.061983 | -1.027165 |
| 34 | C | 2.654211  | -2.601873 | -2.251782 |
| 35 | H | 3.043798  | -2.992478 | -3.195486 |
| 36 | C | -1.691136 | 1.638185  | -1.959824 |
| 37 | N | -1.544786 | 1.492508  | -0.591061 |
| 38 | C | -2.406657 | 2.360097  | -0.021790 |
| 39 | N | -3.107701 | 3.061983  | -1.027165 |
| 40 | C | -2.654212 | 2.601874  | -2.251782 |
| 41 | H | -3.043798 | 2.992478  | -3.195486 |
| 42 | H | -1.573094 | -1.500664 | 4.787071  |
| 43 | H | -1.573094 | 1.500665  | -4.787070 |
| 44 | C | -2.691578 | -2.649540 | -1.336988 |
| 45 | H | -2.147528 | -2.104627 | -2.117475 |
| 46 | C | -4.057727 | -4.021336 | 0.728991  |
| 47 | H | -4.544495 | -4.512634 | 1.581395  |
| 48 | C | -3.646363 | -3.611830 | -1.636883 |
| 49 | H | -3.879056 | -3.848337 | -2.684242 |
| 50 | C | -4.333173 | -4.302369 | -0.592323 |
| 51 | H | -5.087448 | -5.064919 | -0.826287 |
| 52 | C | 2.691579  | 2.649540  | -1.336989 |
| 53 | H | 2.147528  | 2.104627  | -2.117476 |
| 54 | C | 4.057727  | 4.021336  | 0.728991  |
| 55 | H | 4.544496  | 4.512634  | 1.581394  |
| 56 | C | 3.646364  | 3.611829  | -1.636884 |
| 57 | H | 3.879057  | 3.848336  | -2.684242 |
| 58 | C | 4.333174  | 4.302368  | -0.592324 |
| 59 | H | 5.087449  | 5.064919  | -0.826287 |
| 60 | C | -2.691579 | 2.649541  | 1.336989  |
| 61 | H | -2.147529 | 2.104628  | 2.117476  |
| 62 | C | -4.057727 | 4.021336  | -0.728992 |
| 63 | H | -4.544496 | 4.512634  | -1.581395 |
| 64 | C | 4.057727  | -4.021336 | -0.728992 |
| 65 | H | 4.544495  | -4.512635 | -1.581396 |
| 66 | C | 2.691579  | -2.649541 | 1.336989  |
| 67 | H | 2.147529  | -2.104628 | 2.117476  |
| 68 | C | 4.333174  | -4.302369 | 0.592323  |
| 69 | H | 5.087449  | -5.064920 | 0.826286  |
| 70 | C | 3.646364  | -3.611831 | 1.636883  |
| 71 | H | 3.879057  | -3.848338 | 2.684241  |
| 72 | C | -3.646365 | 3.611830  | 1.636883  |
| 73 | H | -3.879058 | 3.848337  | 2.684241  |
| 74 | C | -4.333175 | 4.302369  | 0.592323  |
| 75 | H | -5.087449 | 5.064920  | 0.826286  |

$[\text{Fe}(\text{L}^1)_2]^{2+}$  ( $\mathbf{1}^{2+}$ ), high-spin,  $\phi = 165^\circ$ .

---

|    |    |           |           |           |
|----|----|-----------|-----------|-----------|
| 1  | Fe | -0.000025 | -0.000007 | -0.112467 |
| 2  | N  | 0.528665  | 2.079126  | 0.169992  |
| 3  | C  | 1.493513  | 2.621441  | -0.620966 |
| 4  | C  | 1.878981  | 3.970062  | -0.481583 |
| 5  | C  | 1.244211  | 4.752898  | 0.498759  |
| 6  | H  | 1.527058  | 5.806784  | 0.630154  |
| 7  | C  | 0.241610  | 4.187876  | 1.302966  |
| 8  | H  | -0.269197 | 4.790217  | 2.065694  |
| 9  | C  | -0.103395 | 2.834454  | 1.104726  |
| 10 | C  | 2.060139  | 1.668487  | -1.585845 |
| 11 | N  | 1.545512  | 0.383101  | -1.617243 |
| 12 | C  | 2.231170  | -0.282246 | -2.570159 |
| 13 | N  | 3.187892  | 0.577865  | -3.150774 |
| 14 | C  | 3.075463  | 1.811110  | -2.528591 |
| 15 | H  | 3.713885  | 2.655411  | -2.801575 |
| 16 | C  | -1.149845 | 2.110334  | 1.833365  |
| 17 | N  | -1.396579 | 0.791929  | 1.496513  |
| 18 | C  | -2.409009 | 0.383482  | 2.289608  |
| 19 | N  | -2.808615 | 1.442753  | 3.136801  |
| 20 | C  | -2.008771 | 2.533348  | 2.845780  |
| 21 | H  | -2.120394 | 3.486824  | 3.368463  |
| 22 | N  | -0.528541 | -2.079150 | 0.169937  |
| 23 | C  | -1.493376 | -2.621508 | -0.621024 |
| 24 | C  | -1.878764 | -3.970156 | -0.481682 |
| 25 | H  | -2.656349 | -4.401651 | -1.125957 |
| 26 | C  | -1.243950 | -4.753001 | 0.498625  |
| 27 | H  | -1.526734 | -5.806908 | 0.629980  |
| 28 | C  | -0.241389 | -4.187936 | 1.302848  |
| 29 | C  | 0.103541  | -2.834489 | 1.104659  |
| 30 | C  | -2.060068 | -1.668563 | -1.585865 |
| 31 | N  | -1.545543 | -0.383140 | -1.617196 |
| 32 | C  | -2.231257 | 0.282226  | -2.570058 |
| 33 | N  | -3.187904 | -0.577925 | -3.150733 |
| 34 | C  | -3.075375 | -1.811204 | -2.528625 |
| 35 | H  | -3.713735 | -2.655534 | -2.801662 |
| 36 | C  | 1.149919  | -2.110331 | 1.833356  |
| 37 | N  | 1.396595  | -0.791913 | 1.496537  |
| 38 | C  | 2.408996  | -0.383436 | 2.289658  |
| 39 | N  | 2.808581  | -1.442680 | 3.136895  |
| 40 | C  | 2.008786  | -2.533299 | 2.845839  |
| 41 | H  | 2.120408  | -3.486767 | 3.368539  |
| 42 | H  | 2.656584  | 4.401549  | -1.125844 |
| 43 | H  | 0.269456  | -4.790262 | 2.065563  |
| 44 | C  | 2.136532  | -1.616846 | -3.038971 |
| 45 | H  | 1.392784  | -2.285530 | -2.588799 |
| 46 | C  | 4.038963  | 0.159556  | -4.156585 |
| 47 | H  | 4.749922  | 0.902742  | -4.540078 |
| 48 | C  | 2.990201  | -2.036781 | -4.050730 |
| 49 | H  | 2.931969  | -3.067612 | -4.426434 |
| 50 | C  | 3.948957  | -1.139232 | -4.611414 |
| 51 | H  | 4.625382  | -1.470438 | -5.410093 |
| 52 | C  | -3.088821 | -0.857346 | 2.393666  |
| 53 | H  | -2.787823 | -1.680791 | 1.736955  |
| 54 | C  | -3.832199 | 1.309560  | 4.056577  |
| 55 | H  | -4.064489 | 2.193977  | 4.663823  |
| 56 | C  | -4.116063 | -0.992361 | 3.317715  |

|    |   |           |           |           |
|----|---|-----------|-----------|-----------|
| 57 | H | -4.651128 | -1.947740 | 3.407360  |
| 58 | C | -4.489440 | 0.101724  | 4.156138  |
| 59 | H | -5.302750 | -0.002783 | 4.885916  |
| 60 | C | 3.088792  | 0.857408  | 2.393725  |
| 61 | H | 2.787816  | 1.680836  | 1.736985  |
| 62 | C | 3.832108  | -1.309448 | 4.056726  |
| 63 | H | 4.064380  | -2.193850 | 4.664002  |
| 64 | C | -4.039011 | -0.159615 | -4.156512 |
| 65 | H | -4.749906 | -0.902834 | -4.540060 |
| 66 | C | -2.136738 | 1.616875  | -3.038767 |
| 67 | H | -1.393047 | 2.285587  | -2.588542 |
| 68 | C | -3.949120 | 1.139216  | -4.611244 |
| 69 | H | -4.625577 | 1.470421  | -5.409895 |
| 70 | C | -2.990446 | 2.036810  | -4.050495 |
| 71 | H | -2.932307 | 3.067675  | -4.426120 |
| 72 | C | 4.115977  | 0.992460  | 3.317833  |
| 73 | H | 4.651017  | 1.947852  | 3.407491  |
| 74 | C | 4.489325  | -0.101599 | 4.156300  |
| 75 | H | 5.302592  | 0.002935  | 4.886121  |

$[\text{Fe}(\text{L}^1)_2]^{2+}$  ( $\mathbf{1}^{2+}$ ), high-spin,  $\phi = 160^\circ$ .

|    |    |           |           |           |
|----|----|-----------|-----------|-----------|
| 1  | Fe | 0.000000  | 0.000000  | -0.155523 |
| 2  | N  | 0.659354  | 2.024633  | 0.219929  |
| 3  | C  | 1.661270  | 2.526215  | -0.552491 |
| 4  | C  | 2.138682  | 3.839465  | -0.369263 |
| 5  | C  | 1.555769  | 4.632704  | 0.634569  |
| 6  | H  | 1.909730  | 5.659891  | 0.800503  |
| 7  | C  | 0.512334  | 4.112719  | 1.416197  |
| 8  | H  | 0.038656  | 4.724966  | 2.194761  |
| 9  | C  | 0.075035  | 2.793089  | 1.173501  |
| 10 | C  | 2.165471  | 1.573280  | -1.551430 |
| 11 | N  | 1.558831  | 0.331054  | -1.638718 |
| 12 | C  | 2.200255  | -0.343530 | -2.616035 |
| 13 | N  | 3.221261  | 0.466946  | -3.155736 |
| 14 | C  | 3.195165  | 1.678730  | -2.483095 |
| 15 | H  | 3.894690  | 2.484504  | -2.720277 |
| 16 | C  | -1.029838 | 2.127132  | 1.869087  |
| 17 | N  | -1.379045 | 0.845745  | 1.484549  |
| 18 | C  | -2.429782 | 0.496961  | 2.256784  |
| 19 | N  | -2.750406 | 1.557744  | 3.136326  |
| 20 | C  | -1.860875 | 2.586899  | 2.888464  |
| 21 | H  | -1.899072 | 3.528604  | 3.441987  |
| 22 | N  | -0.659354 | -2.024633 | 0.219929  |
| 23 | C  | -1.661270 | -2.526215 | -0.552491 |
| 24 | C  | -2.138681 | -3.839465 | -0.369263 |
| 25 | H  | -2.945551 | -4.236820 | -0.999225 |
| 26 | C  | -1.555769 | -4.632704 | 0.634569  |
| 27 | H  | -1.909730 | -5.659891 | 0.800503  |
| 28 | C  | -0.512334 | -4.112719 | 1.416197  |
| 29 | C  | -0.075035 | -2.793088 | 1.173500  |
| 30 | C  | -2.165471 | -1.573281 | -1.551430 |
| 31 | N  | -1.558832 | -0.331054 | -1.638718 |
| 32 | C  | -2.200255 | 0.343531  | -2.616035 |
| 33 | N  | -3.221261 | -0.466946 | -3.155737 |
| 34 | C  | -3.195165 | -1.678730 | -2.483096 |

|    |   |           |           |           |
|----|---|-----------|-----------|-----------|
| 35 | H | -3.894689 | -2.484505 | -2.720278 |
| 36 | C | 1.029838  | -2.127132 | 1.869087  |
| 37 | N | 1.379045  | -0.845744 | 1.484549  |
| 38 | C | 2.429782  | -0.496961 | 2.256784  |
| 39 | N | 2.750406  | -1.557744 | 3.136325  |
| 40 | C | 1.860875  | -2.586899 | 2.888464  |
| 41 | H | 1.899072  | -3.528604 | 3.441987  |
| 42 | H | 2.945550  | 4.236820  | -0.999226 |
| 43 | H | -0.038655 | -4.724965 | 2.194761  |
| 44 | C | 2.010530  | -1.646873 | -3.140346 |
| 45 | H | 1.215878  | -2.276964 | -2.722264 |
| 46 | C | 4.047236  | 0.029160  | -4.174078 |
| 47 | H | 4.813747  | 0.733227  | -4.522788 |
| 48 | C | 2.838959  | -2.086243 | -4.164692 |
| 49 | H | 2.708058  | -3.093536 | -4.583450 |
| 50 | C | 3.865388  | -1.239524 | -4.683089 |
| 51 | H | 4.521708  | -1.586636 | -5.491690 |
| 52 | C | -3.211322 | -0.686244 | 2.319260  |
| 53 | H | -2.973642 | -1.513239 | 1.642008  |
| 54 | C | -3.789418 | 1.481141  | 4.044925  |
| 55 | H | -3.954111 | 2.362608  | 4.678022  |
| 56 | C | -4.254256 | -0.764714 | 3.231975  |
| 57 | H | -4.866089 | -1.675533 | 3.288055  |
| 58 | C | -4.544564 | 0.329477  | 4.102377  |
| 59 | H | -5.370305 | 0.269583  | 4.823158  |
| 60 | C | 3.211322  | 0.686244  | 2.319260  |
| 61 | H | 2.973642  | 1.513240  | 1.642007  |
| 62 | C | 3.789419  | -1.481141 | 4.044924  |
| 63 | H | 3.954111  | -2.362608 | 4.678021  |
| 64 | C | -4.047236 | -0.029160 | -4.174079 |
| 65 | H | -4.813746 | -0.733228 | -4.522789 |
| 66 | C | -2.010531 | 1.646873  | -3.140346 |
| 67 | H | -1.215879 | 2.276965  | -2.722263 |
| 68 | C | -3.865388 | 1.239523  | -4.683090 |
| 69 | H | -4.521707 | 1.586636  | -5.491691 |
| 70 | C | -2.838960 | 2.086243  | -4.164692 |
| 71 | H | -2.708059 | 3.093537  | -4.583450 |
| 72 | C | 4.254256  | 0.764714  | 3.231975  |
| 73 | H | 4.866089  | 1.675533  | 3.288055  |
| 74 | C | 4.544564  | -0.329477 | 4.102376  |
| 75 | H | 5.370306  | -0.269583 | 4.823157  |

$[\text{Fe}(\text{L}^1)_2]^{2+} (\mathbf{1}^{2+})$ , high-spin,  $\phi = 155^\circ$ .

|    |    |           |           |           |
|----|----|-----------|-----------|-----------|
| 1  | Fe | 0.065221  | -0.022488 | -0.205286 |
| 2  | N  | 0.088753  | 2.124052  | 0.056619  |
| 3  | C  | 1.157592  | 2.807477  | -0.438464 |
| 4  | C  | 1.252275  | 4.207843  | -0.317396 |
| 5  | C  | 0.212396  | 4.898900  | 0.328778  |
| 6  | H  | 0.259974  | 5.991511  | 0.437595  |
| 7  | C  | -0.890843 | 4.188674  | 0.825387  |
| 8  | H  | -1.717278 | 4.714755  | 1.320954  |
| 9  | C  | -0.927579 | 2.787023  | 0.661689  |
| 10 | C  | 2.166884  | 1.946273  | -1.071489 |
| 11 | N  | 1.919672  | 0.584979  | -1.137128 |
| 12 | C  | 2.990777  | 0.025552  | -1.738724 |

|    |   |           |           |           |
|----|---|-----------|-----------|-----------|
| 13 | N | 3.926419  | 1.029790  | -2.061297 |
| 14 | C | 3.402484  | 2.243136  | -1.641610 |
| 15 | H | 3.944303  | 3.182758  | -1.777568 |
| 16 | C | -2.031427 | 1.920432  | 1.081686  |
| 17 | N | -1.970781 | 0.571859  | 0.784924  |
| 18 | C | -3.125232 | 0.039542  | 1.240560  |
| 19 | N | -3.914869 | 1.048893  | 1.842527  |
| 20 | C | -3.218101 | 2.237774  | 1.739280  |
| 21 | H | -3.619437 | 3.177811  | 2.126412  |
| 22 | N | -0.292394 | -2.065460 | 0.400727  |
| 23 | C | -0.831265 | -2.910315 | -0.521437 |
| 24 | C | -1.092791 | -4.260687 | -0.215254 |
| 25 | H | -1.521156 | -4.933851 | -0.969667 |
| 26 | C | -0.786668 | -4.728614 | 1.074196  |
| 27 | H | -0.981894 | -5.776416 | 1.342301  |
| 28 | C | -0.218484 | -3.855356 | 2.014025  |
| 29 | C | 0.031546  | -2.518384 | 1.637459  |
| 30 | C | -1.107621 | -2.271492 | -1.816290 |
| 31 | N | -0.755273 | -0.941601 | -1.981612 |
| 32 | C | -1.119891 | -0.597415 | -3.235252 |
| 33 | N | -1.706546 | -1.707995 | -3.875454 |
| 34 | C | -1.695974 | -2.765079 | -2.978162 |
| 35 | H | -2.099694 | -3.746590 | -3.239916 |
| 36 | C | 0.675399  | -1.510438 | 2.483687  |
| 37 | N | 0.932191  | -0.262276 | 1.948399  |
| 38 | C | 1.569186  | 0.432454  | 2.915008  |
| 39 | N | 1.709773  | -0.371526 | 4.071271  |
| 40 | C | 1.140870  | -1.600289 | 3.794095  |
| 41 | H | 1.124308  | -2.409310 | 4.528920  |
| 42 | H | 2.117346  | 4.749237  | -0.722963 |
| 43 | H | 0.039801  | -4.210633 | 3.020377  |
| 44 | C | 3.288504  | -1.321517 | -2.062214 |
| 45 | H | 2.561705  | -2.101287 | -1.802794 |
| 46 | C | 5.127285  | 0.742037  | -2.682968 |
| 47 | H | 5.790310  | 1.592026  | -2.889727 |
| 48 | C | 4.494337  | -1.611052 | -2.687360 |
| 49 | H | 4.745456  | -2.649487 | -2.943698 |
| 50 | C | 5.418834  | -0.568393 | -2.999052 |
| 51 | H | 6.373041  | -0.795808 | -3.491943 |
| 52 | C | -3.644255 | -1.281605 | 1.206166  |
| 53 | H | -3.054656 | -2.071664 | 0.730702  |
| 54 | C | -5.153848 | 0.792723  | 2.399599  |
| 55 | H | -5.681716 | 1.649991  | 2.837039  |
| 56 | C | -4.887825 | -1.540316 | 1.765977  |
| 57 | H | -5.297904 | -2.559373 | 1.742117  |
| 58 | C | -5.647974 | -0.493365 | 2.369748  |
| 59 | H | -6.632669 | -0.696540 | 2.810216  |
| 60 | C | 2.097730  | 1.749621  | 2.947733  |
| 61 | H | 2.007512  | 2.380294  | 2.057525  |
| 62 | C | 2.331679  | 0.080751  | 5.220437  |
| 63 | H | 2.387770  | -0.626273 | 6.058240  |
| 64 | C | -2.179529 | -1.641849 | -5.172964 |
| 65 | H | -2.622969 | -2.558661 | -5.582269 |
| 66 | C | -1.006512 | 0.624652  | -3.943515 |
| 67 | H | -0.552099 | 1.487460  | -3.441132 |
| 68 | C | -2.070127 | -0.453324 | -5.863978 |

|    |   |           |           |           |
|----|---|-----------|-----------|-----------|
| 69 | H | -2.445712 | -0.401788 | -6.894290 |
| 70 | C | -1.479654 | 0.691132  | -5.247293 |
| 71 | H | -1.403200 | 1.629806  | -5.813138 |
| 72 | C | 2.723390  | 2.204461  | 4.100338  |
| 73 | H | 3.137990  | 3.221339  | 4.134201  |
| 74 | C | 2.839005  | 1.361841  | 5.247172  |
| 75 | H | 3.334134  | 1.719663  | 6.159219  |

[Fe(L<sup>1</sup>)<sub>2</sub>]<sup>2+</sup> (**1**<sup>2+</sup>), low-spin.

|    |    |           |           |           |
|----|----|-----------|-----------|-----------|
| 1  | Fe | 0.000000  | 0.000000  | 0.000000  |
| 2  | N  | 0.000000  | 0.000000  | 1.923404  |
| 3  | C  | -0.839846 | -0.839847 | 2.603432  |
| 4  | C  | -0.860485 | -0.860485 | 4.010672  |
| 5  | C  | 0.000000  | 0.000000  | 4.716436  |
| 6  | H  | 0.000000  | 0.000000  | 5.815120  |
| 7  | C  | 0.860485  | 0.860485  | 4.010672  |
| 8  | H  | 1.539456  | 1.539456  | 4.543596  |
| 9  | C  | 0.839847  | 0.839846  | 2.603432  |
| 10 | C  | -1.635704 | -1.635704 | 1.678106  |
| 11 | N  | -1.402844 | -1.402844 | 0.327091  |
| 12 | C  | -2.229814 | -2.229814 | -0.354105 |
| 13 | N  | -2.987578 | -2.987578 | 0.569597  |
| 14 | C  | -2.611996 | -2.611996 | 1.846172  |
| 15 | H  | -3.057668 | -3.057668 | 2.739108  |
| 16 | C  | 1.635704  | 1.635704  | 1.678106  |
| 17 | N  | 1.402844  | 1.402844  | 0.327091  |
| 18 | C  | 2.229814  | 2.229814  | -0.354105 |
| 19 | N  | 2.987578  | 2.987578  | 0.569597  |
| 20 | C  | 2.611996  | 2.611996  | 1.846172  |
| 21 | H  | 3.057668  | 3.057668  | 2.739108  |
| 22 | N  | 0.000000  | 0.000000  | -1.923404 |
| 23 | C  | 0.839847  | -0.839847 | -2.603432 |
| 24 | C  | 0.860485  | -0.860485 | -4.010672 |
| 25 | H  | 1.539456  | -1.539456 | -4.543596 |
| 26 | C  | 0.000000  | 0.000000  | -4.716436 |
| 27 | H  | 0.000000  | 0.000000  | -5.815120 |
| 28 | C  | -0.860485 | 0.860485  | -4.010672 |
| 29 | C  | -0.839846 | 0.839846  | -2.603432 |
| 30 | C  | 1.635704  | -1.635704 | -1.678106 |
| 31 | N  | 1.402844  | -1.402844 | -0.327091 |
| 32 | C  | 2.229814  | -2.229814 | 0.354105  |
| 33 | N  | 2.987578  | -2.987578 | -0.569597 |
| 34 | C  | 2.611996  | -2.611996 | -1.846172 |
| 35 | H  | 3.057668  | -3.057668 | -2.739108 |
| 36 | C  | -1.635704 | 1.635704  | -1.678106 |
| 37 | N  | -1.402844 | 1.402844  | -0.327091 |
| 38 | C  | -2.229814 | 2.229814  | 0.354105  |
| 39 | N  | -2.987578 | 2.987578  | -0.569597 |
| 40 | C  | -2.611996 | 2.611996  | -1.846172 |
| 41 | H  | -3.057668 | 3.057667  | -2.739108 |
| 42 | H  | -1.539456 | -1.539456 | 4.543596  |
| 43 | H  | -1.539456 | 1.539456  | -4.543596 |
| 44 | C  | -2.442742 | -2.442742 | -1.740920 |
| 45 | H  | -1.862806 | -1.862806 | -2.465964 |
| 46 | C  | -3.922774 | -3.922774 | 0.163319  |

|    |   |           |           |           |
|----|---|-----------|-----------|-----------|
| 47 | H | -4.456515 | -4.456515 | 0.960240  |
| 48 | C | -3.381632 | -3.381631 | -2.146230 |
| 49 | H | -3.555313 | -3.555313 | -3.217030 |
| 50 | C | -4.127521 | -4.127520 | -1.183508 |
| 51 | H | -4.870474 | -4.870474 | -1.501512 |
| 52 | C | 2.442742  | 2.442742  | -1.740920 |
| 53 | H | 1.862806  | 1.862806  | -2.465964 |
| 54 | C | 3.922774  | 3.922774  | 0.163319  |
| 55 | H | 4.456515  | 4.456515  | 0.960240  |
| 56 | C | 3.381631  | 3.381632  | -2.146230 |
| 57 | H | 3.555313  | 3.555313  | -3.217030 |
| 58 | C | 4.127520  | 4.127521  | -1.183508 |
| 59 | H | 4.870474  | 4.870474  | -1.501512 |
| 60 | C | -2.442742 | 2.442742  | 1.740920  |
| 61 | H | -1.862806 | 1.862806  | 2.465964  |
| 62 | C | -3.922774 | 3.922774  | -0.163319 |
| 63 | H | -4.456515 | 4.456515  | -0.960240 |
| 64 | C | 3.922774  | -3.922774 | -0.163319 |
| 65 | H | 4.456516  | -4.456516 | -0.960240 |
| 66 | C | 2.442742  | -2.442742 | 1.740921  |
| 67 | H | 1.862806  | -1.862806 | 2.465964  |
| 68 | C | 4.127521  | -4.127521 | 1.183508  |
| 69 | H | 4.870474  | -4.870474 | 1.501512  |
| 70 | C | 3.381631  | -3.381631 | 2.146230  |
| 71 | H | 3.555313  | -3.555313 | 3.217030  |
| 72 | C | -3.381632 | 3.381632  | 2.146230  |
| 73 | H | -3.555313 | 3.555313  | 3.217029  |
| 74 | C | -4.127521 | 4.127521  | 1.183507  |
| 75 | H | -4.870474 | 4.870474  | 1.501512  |

$[\text{Fe}(\text{L}^2)_2]^{2+}$  ( $2^+$ ), high-spin,  $\phi = 180^\circ$ .

|    |    |           |           |           |
|----|----|-----------|-----------|-----------|
| 1  | Fe | 0.000000  | 0.000000  | 0.000000  |
| 2  | N  | 0.000000  | 0.000000  | 2.163638  |
| 3  | C  | -0.812959 | -0.850707 | 2.836262  |
| 4  | C  | -0.837220 | -0.880141 | 4.244871  |
| 5  | C  | -0.000001 | 0.000001  | 4.950244  |
| 6  | H  | -0.000001 | 0.000001  | 6.049183  |
| 7  | C  | 0.837219  | 0.880142  | 4.244871  |
| 8  | H  | 1.497443  | 1.575296  | 4.780679  |
| 9  | C  | 0.812959  | 0.850708  | 2.836262  |
| 10 | C  | -1.632556 | -1.690421 | 1.949908  |
| 11 | N  | -1.471967 | -1.531933 | 0.586589  |
| 12 | C  | -2.327870 | -2.378066 | -0.007611 |
| 13 | N  | -3.047957 | -3.094804 | 0.994244  |
| 14 | C  | -2.601974 | -2.656412 | 2.225804  |
| 15 | H  | -3.000356 | -3.051144 | 3.164711  |
| 16 | C  | 1.632556  | 1.690421  | 1.949908  |
| 17 | N  | 1.471967  | 1.531932  | 0.586589  |
| 18 | C  | 2.327870  | 2.378065  | -0.007611 |
| 19 | N  | 3.047957  | 3.094804  | 0.994245  |
| 20 | C  | 2.601975  | 2.656412  | 2.225804  |
| 21 | H  | 3.000357  | 3.051144  | 3.164711  |
| 22 | N  | 0.000000  | 0.000000  | -2.163638 |
| 23 | C  | 0.812959  | -0.850707 | -2.836262 |
| 24 | C  | 0.837219  | -0.880142 | -4.244871 |



|    |   |           |           |           |
|----|---|-----------|-----------|-----------|
| 25 | H | 1.497443  | -1.575296 | -4.780679 |
| 26 | C | -0.000001 | 0.000000  | -4.950244 |
| 27 | H | -0.000001 | 0.000000  | -6.049183 |
| 28 | C | -0.837220 | 0.880142  | -4.244871 |
| 29 | C | -0.812959 | 0.850707  | -2.836262 |
| 30 | C | 1.632556  | -1.690421 | -1.949908 |
| 31 | N | 1.471967  | -1.531933 | -0.586589 |
| 32 | C | 2.327870  | -2.378065 | 0.007611  |
| 33 | N | 3.047957  | -3.094804 | -0.994244 |
| 34 | C | 2.601974  | -2.656412 | -2.225804 |
| 35 | H | 3.000356  | -3.051144 | -3.164711 |
| 36 | C | -1.632556 | 1.690421  | -1.949907 |
| 37 | N | -1.471966 | 1.531932  | -0.586589 |
| 38 | C | -2.327870 | 2.378065  | 0.007611  |
| 39 | N | -3.047957 | 3.094804  | -0.994244 |
| 40 | C | -2.601975 | 2.656412  | -2.225803 |
| 41 | H | -3.000357 | 3.051144  | -3.164710 |
| 42 | H | -1.497444 | -1.575295 | 4.780679  |
| 43 | H | -1.497444 | 1.575296  | -4.780678 |
| 44 | N | -2.525290 | -2.573625 | -1.318395 |
| 45 | C | -3.993039 | -4.026014 | 0.625933  |
| 46 | H | -4.526214 | -4.551012 | 1.430312  |
| 47 | C | -3.439195 | -3.477237 | -1.666952 |
| 48 | H | -3.596848 | -3.633887 | -2.746707 |
| 49 | C | -4.202821 | -4.231135 | -0.723346 |
| 50 | H | -4.947605 | -4.964460 | -1.058203 |
| 51 | N | 2.525291  | 2.573624  | -1.318395 |
| 52 | C | 3.993039  | 4.026013  | 0.625933  |
| 53 | H | 4.526214  | 4.551012  | 1.430313  |
| 54 | C | 3.439195  | 3.477236  | -1.666951 |
| 55 | H | 3.596848  | 3.633887  | -2.746706 |
| 56 | C | 4.202821  | 4.231134  | -0.723346 |
| 57 | H | 4.947606  | 4.964459  | -1.058202 |
| 58 | N | -2.525290 | 2.573625  | 1.318395  |
| 59 | C | -3.993039 | 4.026013  | -0.625933 |
| 60 | H | -4.526214 | 4.551012  | -1.430312 |
| 61 | C | 3.993039  | -4.026013 | -0.625933 |
| 62 | H | 4.526214  | -4.551012 | -1.430313 |
| 63 | N | 2.525291  | -2.573624 | 1.318395  |
| 64 | C | 4.202821  | -4.231134 | 0.723346  |
| 65 | H | 4.947606  | -4.964459 | 1.058202  |
| 66 | C | 3.439195  | -3.477236 | 1.666952  |
| 67 | H | 3.596849  | -3.633886 | 2.746706  |
| 68 | C | -3.439194 | 3.477236  | 1.666951  |
| 69 | H | -3.596847 | 3.633887  | 2.746706  |
| 70 | C | -4.202820 | 4.231134  | 0.723346  |
| 71 | H | -4.947605 | 4.964459  | 1.058203  |

$[\text{Fe}(\text{L}^2)_2]^{2+}$  ( $2^{2+}$ ), high-spin,  $\phi = 165^\circ$ .

|   |    |          |          |           |
|---|----|----------|----------|-----------|
| 1 | Fe | 0.000000 | 0.000000 | -0.125132 |
| 2 | N  | 0.705032 | 2.032218 | 0.158058  |
| 3 | C  | 1.728088 | 2.480276 | -0.610692 |
| 4 | C  | 2.242930 | 3.782324 | -0.456489 |
| 5 | C  | 1.677925 | 4.616198 | 0.523030  |
| 6 | H  | 2.061559 | 5.635927 | 0.667033  |

|    |   |           |           |           |
|----|---|-----------|-----------|-----------|
| 7  | C | 0.617140  | 4.144775  | 1.313160  |
| 8  | H | 0.161636  | 4.786484  | 2.079149  |
| 9  | C | 0.146112  | 2.833747  | 1.096298  |
| 10 | C | 2.208301  | 1.482665  | -1.578589 |
| 11 | N | 1.577646  | 0.253103  | -1.600673 |
| 12 | C | 2.186714  | -0.483704 | -2.543544 |
| 13 | N | 3.225207  | 0.288815  | -3.139120 |
| 14 | C | 3.231198  | 1.528080  | -2.526733 |
| 15 | H | 3.940951  | 2.312057  | -2.805280 |
| 16 | C | -0.973035 | 2.199183  | 1.806346  |
| 17 | N | -1.300592 | 0.902886  | 1.460535  |
| 18 | C | -2.354671 | 0.555446  | 2.215675  |
| 19 | N | -2.709241 | 1.650796  | 3.059818  |
| 20 | C | -1.830744 | 2.682981  | 2.796392  |
| 21 | H | -1.890070 | 3.645111  | 3.312887  |
| 22 | N | -0.705032 | -2.032218 | 0.158058  |
| 23 | C | -1.728088 | -2.480276 | -0.610691 |
| 24 | C | -2.242930 | -3.782324 | -0.456489 |
| 25 | H | -3.067868 | -4.139843 | -1.087007 |
| 26 | C | -1.677926 | -4.616198 | 0.523031  |
| 27 | H | -2.061559 | -5.635927 | 0.667033  |
| 28 | C | -0.617141 | -4.144775 | 1.313160  |
| 29 | C | -0.146112 | -2.833747 | 1.096298  |
| 30 | C | -2.208301 | -1.482665 | -1.578588 |
| 31 | N | -1.577646 | -0.253103 | -1.600673 |
| 32 | C | -2.186714 | 0.483704  | -2.543544 |
| 33 | N | -3.225207 | -0.288815 | -3.139119 |
| 34 | C | -3.231198 | -1.528080 | -2.526733 |
| 35 | H | -3.940951 | -2.312057 | -2.805280 |
| 36 | C | 0.973035  | -2.199183 | 1.806346  |
| 37 | N | 1.300592  | -0.902886 | 1.460535  |
| 38 | C | 2.354671  | -0.555446 | 2.215675  |
| 39 | N | 2.709241  | -1.650796 | 3.059818  |
| 40 | C | 1.830743  | -2.682981 | 2.796392  |
| 41 | H | 1.890069  | -3.645111 | 3.312888  |
| 42 | H | 3.067868  | 4.139843  | -1.087007 |
| 43 | H | -0.161637 | -4.786484 | 2.079150  |
| 44 | N | 1.912966  | -1.741261 | -2.914421 |
| 45 | C | 3.998543  | -0.258534 | -4.138306 |
| 46 | H | 4.790014  | 0.371343  | -4.566651 |
| 47 | C | 2.663696  | -2.263868 | -3.882009 |
| 48 | H | 2.435973  | -3.299205 | -4.184314 |
| 49 | C | 3.724447  | -1.555093 | -4.526368 |
| 50 | H | 4.318059  | -2.027892 | -5.319253 |
| 51 | N | -3.017846 | -0.609283 | 2.231805  |
| 52 | C | -3.771368 | 1.534477  | 3.928339  |
| 53 | H | -4.009871 | 2.405198  | 4.554272  |
| 54 | C | -4.041059 | -0.716048 | 3.076952  |
| 55 | H | -4.581301 | -1.676946 | 3.085003  |
| 56 | C | -4.457332 | 0.336331  | 3.949498  |
| 57 | H | -5.309729 | 0.202776  | 4.627763  |
| 58 | N | 3.017847  | 0.609283  | 2.231805  |
| 59 | C | 3.771368  | -1.534477 | 3.928339  |
| 60 | H | 4.009871  | -2.405198 | 4.554272  |
| 61 | C | -3.998543 | 0.258534  | -4.138305 |
| 62 | H | -4.790014 | -0.371343 | -4.566651 |

|    |   |           |           |           |
|----|---|-----------|-----------|-----------|
| 63 | N | -1.912966 | 1.741260  | -2.914421 |
| 64 | C | -3.724447 | 1.555094  | -4.526368 |
| 65 | H | -4.318059 | 2.027892  | -5.319253 |
| 66 | C | -2.663696 | 2.263868  | -3.882009 |
| 67 | H | -2.435972 | 3.299205  | -4.184314 |
| 68 | C | 4.041059  | 0.716047  | 3.076952  |
| 69 | H | 4.581301  | 1.676945  | 3.085003  |
| 70 | C | 4.457332  | -0.336331 | 3.949498  |
| 71 | H | 5.309729  | -0.202776 | 4.627763  |

$[\text{Fe}(\text{L}^2)_2]^{2+}$  ( $2^{2+}$ ), high-spin,  $\phi = 160^\circ$ .

|    |    |           |           |           |
|----|----|-----------|-----------|-----------|
| 1  | Fe | 0.000000  | 0.000000  | -0.161902 |
| 2  | N  | 0.826418  | 1.971163  | 0.214979  |
| 3  | C  | 1.886331  | 2.376931  | -0.527262 |
| 4  | C  | 2.490483  | 3.631303  | -0.315882 |
| 5  | C  | 1.974707  | 4.464031  | 0.691253  |
| 6  | H  | 2.427772  | 5.447379  | 0.879742  |
| 7  | C  | 0.872585  | 4.039207  | 1.450327  |
| 8  | H  | 0.452236  | 4.681861  | 2.235380  |
| 9  | C  | 0.312772  | 2.774171  | 1.176819  |
| 10 | C  | 2.303148  | 1.391783  | -1.536194 |
| 11 | N  | 1.587709  | 0.212175  | -1.617620 |
| 12 | C  | 2.148183  | -0.521639 | -2.592575 |
| 13 | N  | 3.238989  | 0.203842  | -3.151481 |
| 14 | C  | 3.329959  | 1.409356  | -2.480819 |
| 15 | H  | 4.092567  | 2.154753  | -2.723175 |
| 16 | C  | -0.861617 | 2.197216  | 1.844625  |
| 17 | N  | -1.278630 | 0.943351  | 1.443188  |
| 18 | C  | -2.372716 | 0.652148  | 2.164985  |
| 19 | N  | -2.659582 | 1.739733  | 3.044987  |
| 20 | C  | -1.699474 | 2.709544  | 2.837266  |
| 21 | H  | -1.695967 | 3.653725  | 3.388945  |
| 22 | N  | -0.826418 | -1.971163 | 0.214979  |
| 23 | C  | -1.886330 | -2.376931 | -0.527262 |
| 24 | C  | -2.490482 | -3.631303 | -0.315882 |
| 25 | H  | -3.345312 | -3.954160 | -0.924905 |
| 26 | C  | -1.974707 | -4.464031 | 0.691254  |
| 27 | H  | -2.427772 | -5.447379 | 0.879742  |
| 28 | C  | -0.872585 | -4.039207 | 1.450327  |
| 29 | C  | -0.312772 | -2.774171 | 1.176819  |
| 30 | C  | -2.303148 | -1.391784 | -1.536194 |
| 31 | N  | -1.587709 | -0.212175 | -1.617620 |
| 32 | C  | -2.148183 | 0.521639  | -2.592575 |
| 33 | N  | -3.238989 | -0.203842 | -3.151481 |
| 34 | C  | -3.329959 | -1.409356 | -2.480819 |
| 35 | H  | -4.092567 | -2.154754 | -2.723175 |
| 36 | C  | 0.861617  | -2.197215 | 1.844625  |
| 37 | N  | 1.278630  | -0.943351 | 1.443188  |
| 38 | C  | 2.372716  | -0.652148 | 2.164985  |
| 39 | N  | 2.659582  | -1.739733 | 3.044987  |
| 40 | C  | 1.699474  | -2.709544 | 2.837266  |
| 41 | H  | 1.695967  | -3.653725 | 3.388944  |
| 42 | H  | 3.345312  | 3.954160  | -0.924905 |
| 43 | H  | -0.452236 | -4.681861 | 2.235380  |
| 44 | N  | 1.789407  | -1.739264 | -3.019422 |

|    |   |           |           |           |
|----|---|-----------|-----------|-----------|
| 45 | C | 3.975184  | -0.349321 | -4.175253 |
| 46 | H | 4.809930  | 0.242797  | -4.574319 |
| 47 | C | 2.504973  | -2.267941 | -4.010177 |
| 48 | H | 2.207998  | -3.270654 | -4.358776 |
| 49 | C | 3.613248  | -1.604808 | -4.622117 |
| 50 | H | 4.175193  | -2.080585 | -5.436054 |
| 51 | N | -3.127123 | -0.455304 | 2.123647  |
| 52 | C | -3.744425 | 1.675134  | 3.890221  |
| 53 | H | -3.927121 | 2.538131  | 4.544980  |
| 54 | C | -4.172473 | -0.512503 | 2.946072  |
| 55 | H | -4.787056 | -1.426825 | 2.906110  |
| 56 | C | -4.522418 | 0.535126  | 3.852742  |
| 57 | H | -5.395953 | 0.443521  | 4.510716  |
| 58 | N | 3.127123  | 0.455304  | 2.123647  |
| 59 | C | 3.744425  | -1.675134 | 3.890221  |
| 60 | H | 3.927121  | -2.538131 | 4.544980  |
| 61 | C | -3.975184 | 0.349321  | -4.175253 |
| 62 | H | -4.809930 | -0.242797 | -4.574319 |
| 63 | N | -1.789407 | 1.739264  | -3.019422 |
| 64 | C | -3.613248 | 1.604808  | -4.622117 |
| 65 | H | -4.175194 | 2.080585  | -5.436054 |
| 66 | C | -2.504973 | 2.267941  | -4.010176 |
| 67 | H | -2.207999 | 3.270654  | -4.358776 |
| 68 | C | 4.172473  | 0.512503  | 2.946073  |
| 69 | H | 4.787056  | 1.426825  | 2.906110  |
| 70 | C | 4.522418  | -0.535126 | 3.852742  |
| 71 | H | 5.395953  | -0.443521 | 4.510716  |

$[\text{Fe}(\text{L}^2)_2]^{2+} (2^{2+})$ , high-spin,  $\phi = 155^\circ$ .

|    |    |           |           |           |
|----|----|-----------|-----------|-----------|
| 1  | Fe | 0.000000  | 0.000000  | -0.204736 |
| 2  | N  | 0.913592  | 1.914532  | 0.265554  |
| 3  | C  | 1.999597  | 2.291539  | -0.454737 |
| 4  | C  | 2.668211  | 3.502445  | -0.192065 |
| 5  | C  | 2.187951  | 4.324869  | 0.840761  |
| 6  | H  | 2.689902  | 5.275768  | 1.068025  |
| 7  | C  | 1.056959  | 3.932680  | 1.574220  |
| 8  | H  | 0.661146  | 4.569254  | 2.376788  |
| 9  | C  | 0.433385  | 2.709735  | 1.250534  |
| 10 | C  | 2.368973  | 1.330271  | -1.504486 |
| 11 | N  | 1.591544  | 0.195920  | -1.641756 |
| 12 | C  | 2.111434  | -0.518624 | -2.653185 |
| 13 | N  | 3.241177  | 0.171978  | -3.176765 |
| 14 | C  | 3.396997  | 1.336751  | -2.447990 |
| 15 | H  | 4.198684  | 2.051240  | -2.654954 |
| 16 | C  | -0.779070 | 2.175845  | 1.884246  |
| 17 | N  | -1.264294 | 0.965618  | 1.429924  |
| 18 | C  | -2.382663 | 0.714032  | 2.129522  |
| 19 | N  | -2.613513 | 1.781893  | 3.050222  |
| 20 | C  | -1.595161 | 2.699269  | 2.889307  |
| 21 | H  | -1.542266 | 3.619751  | 3.477236  |
| 22 | N  | -0.913592 | -1.914532 | 0.265553  |
| 23 | C  | -1.999596 | -2.291539 | -0.454739 |
| 24 | C  | -2.668208 | -3.502446 | -0.192069 |
| 25 | H  | -3.543975 | -3.801387 | -0.783301 |
| 26 | C  | -2.187949 | -4.324871 | 0.840757  |

|    |   |           |           |           |
|----|---|-----------|-----------|-----------|
| 27 | H | -2.689899 | -5.275770 | 1.068020  |
| 28 | C | -1.056958 | -3.932682 | 1.574217  |
| 29 | C | -0.433385 | -2.709735 | 1.250533  |
| 30 | C | -2.368973 | -1.330271 | -1.504487 |
| 31 | N | -1.591544 | -0.195920 | -1.641756 |
| 32 | C | -2.111434 | 0.518624  | -2.653185 |
| 33 | N | -3.241177 | -0.171977 | -3.176764 |
| 34 | C | -3.396996 | -1.336751 | -2.447991 |
| 35 | H | -4.198682 | -2.051240 | -2.654956 |
| 36 | C | 0.779067  | -2.175844 | 1.884247  |
| 37 | N | 1.264291  | -0.965616 | 1.429926  |
| 38 | C | 2.382665  | -0.714035 | 2.129518  |
| 39 | N | 2.613509  | -1.781890 | 3.050226  |
| 40 | C | 1.595156  | -2.699265 | 2.889314  |
| 41 | H | 1.542258  | -3.619745 | 3.477245  |
| 42 | H | 3.543978  | 3.801385  | -0.783297 |
| 43 | H | -0.661145 | -4.569255 | 2.376786  |
| 44 | N | 1.684111  | -1.690607 | -3.139331 |
| 45 | C | 3.947003  | -0.371869 | -4.226818 |
| 46 | H | 4.814814  | 0.190597  | -4.597179 |
| 47 | C | 2.370164  | -2.210133 | -4.155694 |
| 48 | H | 2.016697  | -3.175587 | -4.553229 |
| 49 | C | 3.515699  | -1.581875 | -4.734203 |
| 50 | H | 4.051899  | -2.048062 | -5.570798 |
| 51 | N | -3.203004 | -0.342832 | 2.039114  |
| 52 | C | -3.708420 | 1.750448  | 3.883991  |
| 53 | H | -3.845369 | 2.596950  | 4.570684  |
| 54 | C | -4.258154 | -0.368268 | 2.850670  |
| 55 | H | -4.926221 | -1.241502 | 2.770138  |
| 56 | C | -4.553536 | 0.662329  | 3.795403  |
| 57 | H | -5.437571 | 0.598299  | 4.442531  |
| 58 | N | 3.203013  | 0.342823  | 2.039099  |
| 59 | C | 3.708414  | -1.750443 | 3.883997  |
| 60 | H | 3.845357  | -2.596940 | 4.570698  |
| 61 | C | -3.947004 | 0.371870  | -4.226817 |
| 62 | H | -4.814815 | -0.190595 | -4.597178 |
| 63 | N | -1.684111 | 1.690608  | -3.139330 |
| 64 | C | -3.515700 | 1.581877  | -4.734201 |
| 65 | H | -4.051900 | 2.048064  | -5.570797 |
| 66 | C | -2.370164 | 2.210134  | -4.155693 |
| 67 | H | -2.016698 | 3.175588  | -4.553228 |
| 68 | C | 4.258162  | 0.368260  | 2.850658  |
| 69 | H | 4.926234  | 1.241489  | 2.770119  |
| 70 | C | 4.553535  | -0.662329 | 3.795402  |
| 71 | H | 5.437569  | -0.598298 | 4.442531  |

[Fe(L<sup>2</sup>)<sub>2</sub>]<sup>2+</sup> (2<sup>2+</sup>), low-spin.

|   |    |           |           |          |
|---|----|-----------|-----------|----------|
| 1 | Fe | 0.000000  | 0.000000  | 0.000000 |
| 2 | N  | 0.000000  | 0.000000  | 1.923959 |
| 3 | C  | -0.837482 | -0.837482 | 2.600453 |
| 4 | C  | -0.859807 | -0.859807 | 4.006036 |
| 5 | C  | 0.000000  | 0.000000  | 4.711247 |
| 6 | H  | 0.000000  | 0.000000  | 5.809865 |
| 7 | C  | 0.859807  | 0.859807  | 4.006036 |
| 8 | H  | 1.538708  | 1.538708  | 4.539243 |

|    |   |           |           |           |
|----|---|-----------|-----------|-----------|
| 9  | C | 0.837482  | 0.837482  | 2.600453  |
| 10 | C | -1.632500 | -1.632500 | 1.669594  |
| 11 | N | -1.384195 | -1.384195 | 0.325482  |
| 12 | C | -2.193816 | -2.193816 | -0.382711 |
| 13 | N | -2.970640 | -2.970640 | 0.528533  |
| 14 | C | -2.613217 | -2.613217 | 1.813312  |
| 15 | H | -3.067948 | -3.067948 | 2.697683  |
| 16 | C | 1.632500  | 1.632500  | 1.669594  |
| 17 | N | 1.384195  | 1.384195  | 0.325482  |
| 18 | C | 2.193816  | 2.193816  | -0.382711 |
| 19 | N | 2.970640  | 2.970640  | 0.528533  |
| 20 | C | 2.613217  | 2.613217  | 1.813312  |
| 21 | H | 3.067948  | 3.067948  | 2.697683  |
| 22 | N | 0.000000  | 0.000000  | -1.923959 |
| 23 | C | 0.837482  | -0.837482 | -2.600453 |
| 24 | C | 0.859807  | -0.859807 | -4.006036 |
| 25 | H | 1.538708  | -1.538708 | -4.539243 |
| 26 | C | 0.000000  | 0.000000  | -4.711247 |
| 27 | H | 0.000000  | 0.000000  | -5.809865 |
| 28 | C | -0.859807 | 0.859807  | -4.006036 |
| 29 | C | -0.837482 | 0.837482  | -2.600453 |
| 30 | C | 1.632500  | -1.632500 | -1.669594 |
| 31 | N | 1.384195  | -1.384195 | -0.325482 |
| 32 | C | 2.193816  | -2.193816 | 0.382711  |
| 33 | N | 2.970640  | -2.970640 | -0.528533 |
| 34 | C | 2.613217  | -2.613217 | -1.813312 |
| 35 | H | 3.067948  | -3.067948 | -2.697683 |
| 36 | C | -1.632500 | 1.632500  | -1.669594 |
| 37 | N | -1.384195 | 1.384195  | -0.325482 |
| 38 | C | -2.193816 | 2.193816  | 0.382711  |
| 39 | N | -2.970640 | 2.970640  | -0.528533 |
| 40 | C | -2.613217 | 2.613217  | -1.813312 |
| 41 | H | -3.067948 | 3.067948  | -2.697683 |
| 42 | H | -1.538708 | -1.538708 | 4.539243  |
| 43 | H | -1.538708 | 1.538708  | -4.539243 |
| 44 | N | -2.306326 | -2.306326 | -1.711534 |
| 45 | C | -3.882079 | -3.882079 | 0.040252  |
| 46 | H | -4.458799 | -4.458799 | 0.776080  |
| 47 | C | -3.188903 | -3.188903 | -2.175024 |
| 48 | H | -3.276848 | -3.276848 | -3.270157 |
| 49 | C | -4.004255 | -4.004255 | -1.329130 |
| 50 | H | -4.719404 | -4.719404 | -1.755279 |
| 51 | N | 2.306326  | 2.306326  | -1.711534 |
| 52 | C | 3.882079  | 3.882079  | 0.040252  |
| 53 | H | 4.458799  | 4.458799  | 0.776080  |
| 54 | C | 3.188903  | 3.188903  | -2.175024 |
| 55 | H | 3.276848  | 3.276848  | -3.270157 |
| 56 | C | 4.004255  | 4.004255  | -1.329130 |
| 57 | H | 4.719404  | 4.719404  | -1.755279 |
| 58 | N | -2.306326 | 2.306326  | 1.711534  |
| 59 | C | -3.882079 | 3.882079  | -0.040252 |
| 60 | H | -4.458799 | 4.458799  | -0.776080 |
| 61 | C | 3.882079  | -3.882079 | -0.040252 |
| 62 | H | 4.458799  | -4.458799 | -0.776080 |
| 63 | N | 2.306326  | -2.306326 | 1.711534  |
| 64 | C | 4.004255  | -4.004255 | 1.329130  |

|    |   |           |           |          |
|----|---|-----------|-----------|----------|
| 65 | H | 4.719404  | -4.719404 | 1.755279 |
| 66 | C | 3.188903  | -3.188903 | 2.175024 |
| 67 | H | 3.276848  | -3.276848 | 3.270157 |
| 68 | C | -3.188903 | 3.188903  | 2.175024 |
| 69 | H | -3.276848 | 3.276848  | 3.270157 |
| 70 | C | -4.004255 | 4.004255  | 1.329130 |
| 71 | H | -4.719404 | 4.719404  | 1.755279 |

[Fe(L<sup>3</sup>)<sub>2</sub>]<sup>2+</sup> (**3**<sup>2+</sup>), high-spin.

|    |    |           |           |           |
|----|----|-----------|-----------|-----------|
| 1  | Fe | -0.000727 | 0.004589  | 0.000086  |
| 2  | N  | 2.167940  | 0.003812  | -0.009342 |
| 3  | C  | 2.838648  | -0.851683 | -0.825561 |
| 4  | C  | 4.248457  | -0.875217 | -0.856368 |
| 5  | C  | 4.955417  | 0.012114  | -0.027745 |
| 6  | H  | 6.054448  | 0.015363  | -0.035189 |
| 7  | C  | 4.254444  | 0.895871  | 0.809983  |
| 8  | H  | 4.792852  | 1.595850  | 1.462652  |
| 9  | C  | 2.844691  | 0.864155  | 0.797519  |
| 10 | C  | 1.954116  | -1.698995 | -1.632277 |
| 11 | N  | 0.584387  | -1.547661 | -1.491178 |
| 12 | C  | 0.016559  | -2.421063 | -2.343718 |
| 13 | N  | 1.008307  | -3.135398 | -3.031446 |
| 14 | C  | 2.234710  | -2.680177 | -2.578926 |
| 15 | H  | 3.182282  | -3.071310 | -2.953208 |
| 16 | C  | 1.964511  | 1.707476  | 1.613404  |
| 17 | N  | 0.594428  | 1.555954  | 1.475971  |
| 18 | C  | 0.027881  | 2.427645  | 2.330810  |
| 19 | N  | 1.020696  | 3.139093  | 3.019419  |
| 20 | C  | 2.246588  | 2.685398  | 2.563159  |
| 21 | H  | 3.194773  | 3.075594  | 2.936934  |
| 22 | N  | -2.169062 | -0.042938 | -0.019015 |
| 23 | C  | -2.853961 | 0.793333  | -0.843909 |
| 24 | C  | -4.262514 | 0.765620  | -0.904094 |
| 25 | H  | -4.807711 | 1.445547  | -1.572099 |
| 26 | C  | -4.953282 | -0.151930 | -0.094705 |
| 27 | H  | -6.051082 | -0.195036 | -0.124672 |
| 28 | C  | -4.237757 | -1.015035 | 0.751983  |
| 29 | C  | -2.829887 | -0.932751 | 0.768283  |
| 30 | C  | -1.983594 | 1.676818  | -1.627120 |
| 31 | N  | -0.612831 | 1.568054  | -1.460539 |
| 32 | C  | -0.056484 | 2.470361  | -2.290035 |
| 33 | N  | -1.056622 | 3.160158  | -2.990091 |
| 34 | C  | -2.276684 | 2.659526  | -2.568506 |
| 35 | H  | -3.228733 | 3.025820  | -2.956382 |
| 36 | C  | -1.936708 | -1.752207 | 1.594158  |
| 37 | N  | -0.569725 | -1.559621 | 1.478830  |
| 38 | C  | 0.008527  | -2.417684 | 2.339730  |
| 39 | N  | -0.973768 | -3.161580 | 3.009349  |
| 40 | C  | -2.204994 | -2.741641 | 2.535892  |
| 41 | H  | -3.147188 | -3.160725 | 2.893175  |
| 42 | H  | 4.782271  | -1.571004 | -1.517190 |
| 43 | H  | -4.763506 | -1.738544 | 1.389093  |
| 44 | C  | -1.359965 | -2.686228 | -2.610375 |
| 45 | H  | -2.117621 | -2.116142 | -2.060636 |
| 46 | C  | 0.709327  | -4.119471 | -3.994896 |

|    |   |           |           |           |
|----|---|-----------|-----------|-----------|
| 47 | C | -1.689421 | -3.642070 | -3.545026 |
| 48 | H | -2.744175 | -3.859627 | -3.765304 |
| 49 | C | -0.674794 | -4.378758 | -4.257893 |
| 50 | C | -1.348440 | 2.693542  | 2.596302  |
| 51 | H | -2.105488 | 2.125935  | 2.042989  |
| 52 | C | 0.722183  | 4.120490  | 3.985843  |
| 53 | C | -1.677418 | 3.646449  | 3.534068  |
| 54 | H | -2.731983 | 3.864911  | 3.754338  |
| 55 | C | -0.661971 | 4.379271  | 4.249887  |
| 56 | C | 1.387504  | -2.644803 | 2.627231  |
| 57 | H | 2.136790  | -2.048360 | 2.094231  |
| 58 | C | -0.662422 | -4.140068 | 3.974560  |
| 59 | C | -0.769349 | 4.164576  | -3.936024 |
| 60 | C | 1.315854  | 2.784326  | -2.521562 |
| 61 | H | 2.079145  | 2.236089  | -1.957466 |
| 62 | C | 0.611067  | 4.470259  | -4.167273 |
| 63 | C | 1.633897  | 3.760120  | -3.439302 |
| 64 | H | 2.685370  | 4.015855  | -3.632597 |
| 65 | C | 1.729041  | -3.597501 | 3.560764  |
| 66 | H | 2.785919  | -3.787910 | 3.795496  |
| 67 | C | 0.724300  | -4.365408 | 4.254437  |
| 68 | C | -1.788529 | 4.847417  | -4.633185 |
| 69 | H | -2.846450 | 4.615141  | -4.456194 |
| 70 | C | -1.443212 | 5.832454  | -5.563088 |
| 71 | H | -2.237613 | 6.363681  | -6.106180 |
| 72 | C | -0.086448 | 6.150533  | -5.808897 |
| 73 | H | 0.168833  | 6.927973  | -6.542360 |
| 74 | C | 0.922347  | 5.479712  | -5.119590 |
| 75 | H | 1.978669  | 5.722752  | -5.304502 |
| 76 | C | 1.058798  | -5.352498 | 5.223210  |
| 77 | H | 2.120157  | -5.534854 | 5.445490  |
| 78 | C | 0.066282  | -6.075624 | 5.882417  |
| 79 | H | 0.340063  | -6.834595 | 6.628427  |
| 80 | C | -1.296249 | -5.833162 | 5.591885  |
| 81 | H | -2.077748 | -6.403516 | 6.113599  |
| 82 | C | -1.664743 | -4.873628 | 4.644198  |
| 83 | H | -2.727488 | -4.699729 | 4.432520  |
| 84 | C | 1.735044  | 4.826978  | 4.670718  |
| 85 | H | 2.795556  | 4.630206  | 4.468060  |
| 86 | C | 1.379037  | 5.789280  | 5.620200  |
| 87 | H | 2.167763  | 6.339014  | 6.153004  |
| 88 | C | 0.018341  | 6.059975  | 5.899522  |
| 89 | H | -0.245614 | 6.819075  | 6.648974  |
| 90 | C | -0.983842 | 5.366449  | 5.223096  |
| 91 | H | -2.043019 | 5.572983  | 5.434296  |
| 92 | C | 1.721512  | -4.828294 | -4.677382 |
| 93 | H | 2.782147  | -4.631124 | -4.475801 |
| 94 | C | 1.364961  | -5.793790 | -5.623395 |
| 95 | H | 2.153504  | -6.345469 | -6.154480 |
| 96 | C | 0.004403  | -6.065545 | -5.901236 |
| 97 | H | -0.259721 | -6.827396 | -6.647821 |
| 98 | C | -0.997465 | -5.369374 | -5.227147 |
| 99 | H | -2.056735 | -5.576449 | -5.437263 |

[Fe(L<sup>3</sup>)<sub>2</sub>]<sup>2+</sup> (**3**<sup>2+</sup>), low-spin.



|    |    |           |           |           |
|----|----|-----------|-----------|-----------|
| 1  | Fe | 0.000000  | 0.000000  | 0.000000  |
| 2  | N  | 0.000000  | 0.000000  | 1.925668  |
| 3  | C  | 0.840064  | -0.840061 | 2.604282  |
| 4  | C  | 0.860687  | -0.860685 | 4.011836  |
| 5  | C  | 0.000000  | 0.000000  | 4.716913  |
| 6  | H  | 0.000000  | 0.000000  | 5.815624  |
| 7  | C  | -0.860688 | 0.860685  | 4.011836  |
| 8  | H  | -1.539603 | 1.539598  | 4.544697  |
| 9  | C  | -0.840064 | 0.840061  | 2.604282  |
| 10 | C  | 1.634022  | -1.634016 | 1.678495  |
| 11 | N  | 1.403935  | -1.403928 | 0.325191  |
| 12 | C  | 2.231444  | -2.231434 | -0.350256 |
| 13 | N  | 2.985945  | -2.985935 | 0.564460  |
| 14 | C  | 2.609424  | -2.609417 | 1.840149  |
| 15 | H  | 3.044901  | -3.044894 | 2.740831  |
| 16 | C  | -1.634022 | 1.634016  | 1.678495  |
| 17 | N  | -1.403935 | 1.403928  | 0.325191  |
| 18 | C  | -2.231444 | 2.231434  | -0.350256 |
| 19 | N  | -2.985945 | 2.985935  | 0.564460  |
| 20 | C  | -2.609424 | 2.609417  | 1.840149  |
| 21 | H  | -3.044901 | 3.044894  | 2.740831  |
| 22 | N  | 0.000000  | 0.000000  | -1.925668 |
| 23 | C  | 0.840059  | 0.840066  | -2.604282 |
| 24 | C  | 0.860683  | 0.860690  | -4.011836 |
| 25 | H  | 1.539594  | 1.539607  | -4.544697 |
| 26 | C  | 0.000000  | 0.000000  | -4.716913 |
| 27 | H  | 0.000000  | 0.000000  | -5.815625 |
| 28 | C  | -0.860683 | -0.860690 | -4.011836 |
| 29 | C  | -0.840059 | -0.840066 | -2.604282 |
| 30 | C  | 1.634012  | 1.634026  | -1.678495 |
| 31 | N  | 1.403926  | 1.403936  | -0.325191 |
| 32 | C  | 2.231430  | 2.231448  | 0.350256  |
| 33 | N  | 2.985926  | 2.985954  | -0.564460 |
| 34 | C  | 2.609407  | 2.609434  | -1.840149 |
| 35 | H  | 3.044881  | 3.044914  | -2.740831 |
| 36 | C  | -1.634012 | -1.634026 | -1.678494 |
| 37 | N  | -1.403926 | -1.403936 | -0.325191 |
| 38 | C  | -2.231430 | -2.231448 | 0.350256  |
| 39 | N  | -2.985926 | -2.985954 | -0.564460 |
| 40 | C  | -2.609407 | -2.609434 | -1.840149 |
| 41 | H  | -3.044881 | -3.044914 | -2.740831 |
| 42 | H  | 1.539603  | -1.539598 | 4.544697  |
| 43 | H  | -1.539594 | -1.539607 | -4.544697 |
| 44 | C  | 2.427920  | -2.427905 | -1.750202 |
| 45 | H  | 1.837758  | -1.837741 | -2.457622 |
| 46 | C  | 3.941874  | -3.941862 | 0.162611  |
| 47 | C  | 3.353665  | -3.353646 | -2.176798 |
| 48 | H  | 3.514671  | -3.514649 | -3.252128 |
| 49 | C  | 4.130886  | -4.130870 | -1.243637 |
| 50 | C  | -2.427920 | 2.427905  | -1.750202 |
| 51 | H  | -1.837757 | 1.837741  | -2.457622 |
| 52 | C  | -3.941874 | 3.941862  | 0.162612  |
| 53 | C  | -3.353665 | 3.353647  | -2.176798 |
| 54 | H  | -3.514671 | 3.514649  | -3.252128 |
| 55 | C  | -4.130886 | 4.130870  | -1.243637 |
| 56 | C  | -2.427905 | -2.427921 | 1.750202  |

|    |   |           |           |           |
|----|---|-----------|-----------|-----------|
| 57 | H | -1.837746 | -1.837752 | 2.457622  |
| 58 | C | -3.941847 | -3.941889 | -0.162611 |
| 59 | C | 3.941847  | 3.941889  | -0.162612 |
| 60 | C | 2.427905  | 2.427921  | 1.750202  |
| 61 | H | 1.837747  | 1.837752  | 2.457622  |
| 62 | C | 4.130858  | 4.130899  | 1.243637  |
| 63 | C | 3.353642  | 3.353669  | 2.176798  |
| 64 | H | 3.514647  | 3.514673  | 3.252128  |
| 65 | C | -3.353642 | -3.353669 | 2.176798  |
| 66 | H | -3.514647 | -3.514673 | 3.252128  |
| 67 | C | -4.130858 | -4.130899 | 1.243637  |
| 68 | C | -5.091341 | -5.091396 | 1.666827  |
| 69 | H | -5.244337 | -5.244391 | 2.744967  |
| 70 | C | -4.687995 | -4.688051 | -1.099497 |
| 71 | H | -4.544820 | -4.544878 | -2.178068 |
| 72 | C | 4.687995  | 4.688051  | -1.099497 |
| 73 | H | 4.544820  | 4.544878  | -2.178068 |
| 74 | C | 5.091341  | 5.091396  | 1.666827  |
| 75 | H | 5.244337  | 5.244391  | 2.744967  |
| 76 | C | 5.827068  | 5.827138  | 0.739026  |
| 77 | H | 6.565421  | 6.565501  | 1.081289  |
| 78 | C | 5.623207  | 5.623277  | -0.645603 |
| 79 | H | 6.203341  | 6.203423  | -1.376986 |
| 80 | C | -5.827068 | -5.827138 | 0.739026  |
| 81 | H | -6.565421 | -6.565500 | 1.081289  |
| 82 | C | -5.623207 | -5.623277 | -0.645603 |
| 83 | H | -6.203341 | -6.203423 | -1.376986 |
| 84 | C | -4.688028 | 4.688019  | 1.099497  |
| 85 | H | -4.544852 | 4.544846  | 2.178068  |
| 86 | C | -5.091378 | 5.091360  | -1.666827 |
| 87 | H | -5.244375 | 5.244353  | -2.744967 |
| 88 | C | 4.688028  | -4.688019 | 1.099497  |
| 89 | H | 4.544851  | -4.544846 | 2.178068  |
| 90 | C | 5.091378  | -5.091360 | -1.666827 |
| 91 | H | 5.244375  | -5.244353 | -2.744967 |
| 92 | C | 5.623247  | -5.623237 | 0.645603  |
| 93 | H | 6.203386  | -6.203378 | 1.376986  |
| 94 | C | 5.827111  | -5.827095 | -0.739026 |
| 95 | H | 6.565469  | -6.565452 | -1.081289 |
| 96 | C | -5.623247 | 5.623237  | 0.645603  |
| 97 | H | -6.203386 | 6.203378  | 1.376986  |
| 98 | C | -5.827111 | 5.827095  | -0.739026 |
| 99 | H | -6.565469 | 6.565452  | -1.081289 |

$[\text{Fe}(\text{L}^4)_2]^{2+}$  ( $4^{2+}$ ), high-spin.

|    |    |           |           |           |
|----|----|-----------|-----------|-----------|
| 1  | Fe | 0.000000  | 0.000001  | 0.000000  |
| 2  | N  | 0.000000  | 0.000001  | -2.103203 |
| 3  | C  | 1.025379  | 0.590270  | -2.771461 |
| 4  | C  | 1.058644  | 0.592566  | -4.181415 |
| 5  | C  | 0.000000  | 0.000002  | -4.886673 |
| 6  | H  | -0.000001 | 0.000003  | -5.985747 |
| 7  | C  | -1.058645 | -0.592562 | -4.181415 |
| 8  | H  | -1.881884 | -1.070092 | -4.726071 |
| 9  | C  | -1.025379 | -0.590268 | -2.771461 |
| 10 | C  | 2.034240  | 1.268147  | -1.915477 |

|    |   |           |           |           |
|----|---|-----------|-----------|-----------|
| 11 | N | 1.694252  | 1.433030  | -0.619644 |
| 12 | C | 2.506647  | 2.189515  | 0.197660  |
| 13 | C | 3.264591  | 1.750993  | -2.448277 |
| 14 | H | 3.527642  | 1.566906  | -3.496715 |
| 15 | C | -2.034240 | -1.268146 | -1.915477 |
| 16 | N | -1.694251 | -1.433029 | -0.619644 |
| 17 | C | -2.506646 | -2.189515 | 0.197659  |
| 18 | C | -3.264590 | -1.750993 | -2.448278 |
| 19 | H | -3.527641 | -1.566906 | -3.496715 |
| 20 | N | 0.000000  | 0.000001  | 2.103203  |
| 21 | C | 1.025379  | -0.590268 | 2.771462  |
| 22 | C | 1.058645  | -0.592561 | 4.181415  |
| 23 | H | 1.881884  | -1.070091 | 4.726071  |
| 24 | C | 0.000001  | 0.000003  | 4.886673  |
| 25 | H | 0.000002  | 0.000005  | 5.985747  |
| 26 | C | -1.058643 | 0.592566  | 4.181415  |
| 27 | C | -1.025379 | 0.590271  | 2.771461  |
| 28 | C | 2.034239  | -1.268146 | 1.915477  |
| 29 | N | 1.694251  | -1.433029 | 0.619644  |
| 30 | C | 2.506645  | -2.189515 | -0.197659 |
| 31 | C | 3.264590  | -1.750994 | 2.448278  |
| 32 | H | 3.527641  | -1.566906 | 3.496715  |
| 33 | C | -2.034240 | 1.268147  | 1.915477  |
| 34 | N | -1.694252 | 1.433030  | 0.619644  |
| 35 | C | -2.506647 | 2.189515  | -0.197660 |
| 36 | C | -3.264591 | 1.750993  | 2.448277  |
| 37 | H | -3.527642 | 1.566906  | 3.496715  |
| 38 | H | 1.881883  | 1.070097  | -4.726071 |
| 39 | H | -1.881882 | 1.070098  | 4.726071  |
| 40 | C | 4.140488  | -2.435648 | 1.621943  |
| 41 | H | 5.106250  | -2.794222 | 2.007647  |
| 42 | C | 3.777441  | -2.702736 | 0.272469  |
| 43 | C | -4.140491 | 2.435646  | 1.621943  |
| 44 | H | -5.106252 | 2.794218  | 2.007646  |
| 45 | C | -3.777444 | 2.702734  | 0.272468  |
| 46 | C | -4.598423 | 3.466140  | -0.609323 |
| 47 | H | -5.564482 | 3.842777  | -0.242983 |
| 48 | C | -2.090815 | 2.516797  | -1.521308 |
| 49 | H | -1.102715 | 2.184646  | -1.856612 |
| 50 | C | -4.172067 | 3.749401  | -1.900100 |
| 51 | H | -4.802317 | 4.349032  | -2.571912 |
| 52 | C | -2.904214 | 3.283417  | -2.347805 |
| 53 | H | -2.559576 | 3.544272  | -3.359034 |
| 54 | C | 2.090812  | -2.516797 | -1.521308 |
| 55 | H | 1.102713  | -2.184645 | -1.856612 |
| 56 | C | 4.598420  | -3.466143 | -0.609322 |
| 57 | H | 5.564478  | -3.842781 | -0.242981 |
| 58 | C | 4.172063  | -3.749403 | -1.900099 |
| 59 | H | 4.802313  | -4.349036 | -2.571911 |
| 60 | C | 2.904211  | -3.283418 | -2.347805 |
| 61 | H | 2.559573  | -3.544273 | -3.359033 |
| 62 | C | -4.140489 | -2.435648 | -1.621944 |
| 63 | H | -5.106250 | -2.794221 | -2.007647 |
| 64 | C | 3.777444  | 2.702735  | -0.272468 |
| 65 | C | 4.140491  | 2.435646  | -1.621943 |
| 66 | H | 5.106252  | 2.794219  | -2.007646 |

|    |   |           |           |           |
|----|---|-----------|-----------|-----------|
| 67 | C | -3.777441 | -2.702736 | -0.272469 |
| 68 | C | -2.090813 | -2.516797 | 1.521308  |
| 69 | H | -1.102714 | -2.184644 | 1.856612  |
| 70 | C | -4.598420 | -3.466144 | 0.609321  |
| 71 | H | -5.564478 | -3.842781 | 0.242981  |
| 72 | C | -2.904211 | -3.283419 | 2.347804  |
| 73 | H | -2.559573 | -3.544273 | 3.359033  |
| 74 | C | -4.172063 | -3.749404 | 1.900098  |
| 75 | H | -4.802313 | -4.349036 | 2.571910  |
| 76 | C | 2.090815  | 2.516797  | 1.521309  |
| 77 | H | 1.102715  | 2.184646  | 1.856613  |
| 78 | C | 4.598423  | 3.466140  | 0.609323  |
| 79 | H | 5.564482  | 3.842777  | 0.242983  |
| 80 | C | 4.172067  | 3.749401  | 1.900100  |
| 81 | H | 4.802317  | 4.349032  | 2.571912  |
| 82 | C | 2.904214  | 3.283417  | 2.347806  |
| 83 | H | 2.559576  | 3.544272  | 3.359034  |

$[\text{Fe}(\text{L}^4)_2]^{2+}$  ( $4^{2+}$ ), low-spin.

|    |    |           |           |           |
|----|----|-----------|-----------|-----------|
| 1  | Fe | 0.000000  | 0.000000  | 0.000000  |
| 2  | N  | 0.000000  | 0.000000  | -1.896682 |
| 3  | C  | 1.029507  | 0.590158  | -2.564948 |
| 4  | C  | 1.063422  | 0.588480  | -3.973067 |
| 5  | C  | -0.000001 | 0.000001  | -4.678076 |
| 6  | H  | -0.000001 | 0.000001  | -5.776849 |
| 7  | C  | -1.063423 | -0.588480 | -3.973067 |
| 8  | H  | -1.893982 | -1.059357 | -4.513523 |
| 9  | C  | -1.029507 | -0.590159 | -2.564948 |
| 10 | C  | 1.967108  | 1.267991  | -1.660299 |
| 11 | N  | 1.535276  | 1.367925  | -0.371330 |
| 12 | C  | 2.263900  | 2.171226  | 0.496461  |
| 13 | C  | 3.200945  | 1.807168  | -2.112755 |
| 14 | H  | 3.509431  | 1.662167  | -3.155258 |
| 15 | C  | -1.967108 | -1.267991 | -1.660299 |
| 16 | N  | -1.535276 | -1.367925 | -0.371330 |
| 17 | C  | -2.263899 | -2.171226 | 0.496462  |
| 18 | C  | -3.200945 | -1.807168 | -2.112755 |
| 19 | H  | -3.509431 | -1.662168 | -3.155258 |
| 20 | N  | 0.000000  | 0.000000  | 1.896683  |
| 21 | C  | 1.029507  | -0.590159 | 2.564948  |
| 22 | C  | 1.063422  | -0.588480 | 3.973067  |
| 23 | H  | 1.893981  | -1.059358 | 4.513524  |
| 24 | C  | -0.000001 | 0.000000  | 4.678076  |
| 25 | H  | -0.000001 | 0.000000  | 5.776850  |
| 26 | C  | -1.063423 | 0.588480  | 3.973067  |
| 27 | C  | -1.029507 | 0.590159  | 2.564948  |
| 28 | C  | 1.967108  | -1.267991 | 1.660299  |
| 29 | N  | 1.535277  | -1.367925 | 0.371330  |
| 30 | C  | 2.263900  | -2.171226 | -0.496461 |
| 31 | C  | 3.200945  | -1.807168 | 2.112755  |
| 32 | H  | 3.509431  | -1.662168 | 3.155259  |
| 33 | C  | -1.967108 | 1.267991  | 1.660299  |
| 34 | N  | -1.535277 | 1.367925  | 0.371329  |
| 35 | C  | -2.263900 | 2.171226  | -0.496462 |
| 36 | C  | -3.200945 | 1.807168  | 2.112755  |

|    |   |           |           |           |
|----|---|-----------|-----------|-----------|
| 37 | H | -3.509432 | 1.662168  | 3.155258  |
| 38 | H | 1.893981  | 1.059358  | -4.513524 |
| 39 | H | -1.893982 | 1.059358  | 4.513523  |
| 40 | C | 4.015506  | -2.480391 | 1.220756  |
| 41 | H | 4.994555  | -2.870948 | 1.533777  |
| 42 | C | 3.554436  | -2.710286 | -0.104807 |
| 43 | C | -4.015507 | 2.480391  | 1.220756  |
| 44 | H | -4.994555 | 2.870949  | 1.533776  |
| 45 | C | -3.554436 | 2.710286  | -0.104807 |
| 46 | C | -4.304665 | 3.494562  | -1.030222 |
| 47 | H | -5.286872 | 3.878286  | -0.718804 |
| 48 | C | -1.749759 | 2.546291  | -1.771157 |
| 49 | H | -0.736468 | 2.245775  | -2.041987 |
| 50 | C | -3.791087 | 3.798677  | -2.282778 |
| 51 | H | -4.368244 | 4.415674  | -2.985655 |
| 52 | C | -2.492761 | 3.342095  | -2.636667 |
| 53 | H | -2.060425 | 3.636250  | -3.603932 |
| 54 | C | 1.749759  | -2.546291 | -1.771157 |
| 55 | H | 0.736469  | -2.245775 | -2.041987 |
| 56 | C | 4.304666  | -3.494561 | -1.030222 |
| 57 | H | 5.286873  | -3.878285 | -0.718803 |
| 58 | C | 3.791088  | -3.798676 | -2.282778 |
| 59 | H | 4.368245  | -4.415672 | -2.985655 |
| 60 | C | 2.492762  | -3.342095 | -2.636667 |
| 61 | H | 2.060426  | -3.636249 | -3.603932 |
| 62 | C | -4.015506 | -2.480391 | -1.220756 |
| 63 | H | -4.994555 | -2.870949 | -1.533777 |
| 64 | C | 3.554436  | 2.710286  | 0.104807  |
| 65 | C | 4.015507  | 2.480391  | -1.220756 |
| 66 | H | 4.994555  | 2.870949  | -1.533777 |
| 67 | C | -3.554435 | -2.710286 | 0.104807  |
| 68 | C | -1.749759 | -2.546291 | 1.771157  |
| 69 | H | -0.736468 | -2.245775 | 2.041988  |
| 70 | C | -4.304665 | -3.494562 | 1.030222  |
| 71 | H | -5.286872 | -3.878286 | 0.718804  |
| 72 | C | -2.492762 | -3.342095 | 2.636667  |
| 73 | H | -2.060425 | -3.636250 | 3.603933  |
| 74 | C | -3.791087 | -3.798677 | 2.282778  |
| 75 | H | -4.368244 | -4.415673 | 2.985655  |
| 76 | C | 1.749759  | 2.546291  | 1.771157  |
| 77 | H | 0.736468  | 2.245775  | 2.041988  |
| 78 | C | 4.304666  | 3.494562  | 1.030221  |
| 79 | H | 5.286872  | 3.878285  | 0.718803  |
| 80 | C | 3.791088  | 3.798676  | 2.282777  |
| 81 | H | 4.368245  | 4.415673  | 2.985654  |
| 82 | C | 2.492762  | 3.342095  | 2.636667  |
| 83 | H | 2.060426  | 3.636249  | 3.603932  |

[Fe(bimpy)<sub>2</sub>]<sup>2+</sup>, high-spin (from ref. 24).

|   |    |           |           |           |
|---|----|-----------|-----------|-----------|
| 1 | Fe | -0.000017 | -0.000028 | 0.003395  |
| 2 | N  | -2.160871 | -0.007777 | -0.016768 |
| 3 | C  | -2.828845 | 0.795211  | -0.883617 |
| 4 | C  | -4.238828 | 0.808592  | -0.931271 |
| 5 | C  | -4.946712 | -0.025677 | -0.048494 |
| 6 | H  | -6.045499 | -0.033082 | -0.061417 |

|    |   |           |           |           |
|----|---|-----------|-----------|-----------|
| 7  | C | -4.248583 | -0.850356 | 0.851096  |
| 8  | H | -4.799442 | -1.501496 | 1.543344  |
| 9  | C | -2.838325 | -0.818183 | 0.836085  |
| 10 | C | -1.915817 | 1.599846  | -1.698696 |
| 11 | N | -0.584445 | 1.486418  | -1.547800 |
| 12 | C | -0.014552 | 2.388731  | -2.435767 |
| 13 | C | -1.056873 | 3.063847  | -3.147360 |
| 14 | N | -2.239755 | 2.531719  | -2.650427 |
| 15 | C | -1.933407 | -1.608584 | 1.673877  |
| 16 | N | -0.600778 | -1.476174 | 1.553032  |
| 17 | C | -0.037931 | -2.364247 | 2.459344  |
| 18 | C | -1.085931 | -3.051398 | 3.150567  |
| 19 | N | -2.265045 | -2.540513 | 2.622900  |
| 20 | N | 2.160861  | 0.007486  | -0.016664 |
| 21 | C | 2.828792  | -0.795656 | -0.883394 |
| 22 | C | 4.238779  | -0.809302 | -0.930863 |
| 23 | H | 4.782014  | -1.453740 | -1.635257 |
| 24 | C | 4.946700  | 0.024872  | -0.048025 |
| 25 | H | 6.045490  | 0.032065  | -0.060798 |
| 26 | C | 4.248609  | 0.849728  | 0.851431  |
| 27 | C | 2.838344  | 0.817820  | 0.836230  |
| 28 | C | 1.915722  | -1.600151 | -1.698572 |
| 29 | N | 0.584351  | -1.486524 | -1.547831 |
| 30 | C | 0.014431  | -2.388723 | -2.435898 |
| 31 | C | 1.056736  | -3.063971 | -3.147390 |
| 32 | N | 2.239636  | -2.532041 | -2.650295 |
| 33 | C | 1.933463  | 1.608453  | 1.673845  |
| 34 | N | 0.600825  | 1.476248  | 1.552885  |
| 35 | C | 0.038035  | 2.364545  | 2.459009  |
| 36 | C | 1.086079  | 3.051623  | 3.150240  |
| 37 | N | 2.265161  | 2.540464  | 2.622769  |
| 38 | H | -4.782087 | 1.452897  | -1.635767 |
| 39 | H | 4.799499  | 1.500794  | 1.543722  |
| 40 | H | -1.644162 | -4.544653 | 4.663182  |
| 41 | C | -0.833838 | -4.020521 | 4.138311  |
| 42 | C | 1.311870  | -2.650335 | 2.762653  |
| 43 | H | 2.129112  | -2.133320 | 2.243089  |
| 44 | H | 0.759035  | -5.037614 | 5.184064  |
| 45 | C | 0.511166  | -4.287330 | 4.420083  |
| 46 | C | 1.565628  | -3.613551 | 3.744098  |
| 47 | H | 2.604517  | -3.860840 | 4.004189  |
| 48 | H | 2.151028  | 2.194574  | -2.169151 |
| 49 | C | 1.337134  | 2.699323  | -2.705596 |
| 50 | C | -0.797689 | 4.042961  | -4.123334 |
| 51 | H | -1.604105 | 4.557234  | -4.663747 |
| 52 | C | 0.548909  | 4.332966  | -4.372457 |
| 53 | H | 0.802272  | 5.091746  | -5.126178 |
| 54 | H | 2.638482  | 3.938459  | -3.909140 |
| 55 | C | 1.597956  | 3.672399  | -3.675460 |
| 56 | H | -3.179796 | 2.799629  | -2.942713 |
| 57 | H | -3.207491 | -2.819875 | 2.896109  |
| 58 | H | 3.179671  | -2.800067 | -2.942493 |
| 59 | H | 3.207625  | 2.819728  | 2.896017  |
| 60 | C | 0.797526  | -4.043005 | -4.123438 |
| 61 | H | 1.603932  | -4.557378 | -4.663771 |
| 62 | C | -1.337269 | -2.699094 | -2.705917 |

|    |   |           |           |           |
|----|---|-----------|-----------|-----------|
| 63 | H | -2.151158 | -2.194230 | -2.169571 |
| 64 | H | -0.802469 | -5.091503 | -5.126528 |
| 65 | C | -0.549084 | -4.332793 | -4.372743 |
| 66 | H | -2.638655 | -3.937974 | -3.909683 |
| 67 | C | -1.598118 | -3.672090 | -3.675853 |
| 68 | C | 0.834045  | 4.020935  | 4.137815  |
| 69 | H | 1.644402  | 4.545008  | 4.662694  |
| 70 | C | -1.311750 | 2.650911  | 2.762128  |
| 71 | H | -2.129024 | 2.133972  | 2.242538  |
| 72 | H | -2.604323 | 3.861822  | 4.003343  |
| 73 | C | -1.565449 | 3.614312  | 3.743405  |
| 74 | H | -0.758768 | 5.038448  | 5.183250  |
| 75 | C | -0.510944 | 4.288009  | 4.419406  |

[Fe(bimpy)<sub>2</sub>]<sup>2+</sup>, low-spin (from ref. 24).

|    |    |           |           |           |
|----|----|-----------|-----------|-----------|
| 1  | Fe | 0.000000  | 0.000001  | 0.000000  |
| 2  | N  | 0.000000  | 0.000000  | 1.919619  |
| 3  | C  | -0.839132 | -0.839132 | 2.600432  |
| 4  | C  | -0.861769 | -0.861769 | 4.009171  |
| 5  | C  | 0.000000  | 0.000000  | 4.712597  |
| 6  | H  | 0.000000  | 0.000000  | 5.811214  |
| 7  | C  | 0.861769  | 0.861769  | 4.009172  |
| 8  | H  | 1.537500  | 1.537500  | 4.550689  |
| 9  | C  | 0.839132  | 0.839132  | 2.600432  |
| 10 | C  | -1.614522 | -1.614521 | 1.649932  |
| 11 | N  | -1.397274 | -1.397273 | 0.333428  |
| 12 | C  | -2.252771 | -2.252771 | -0.354499 |
| 13 | C  | -3.005668 | -3.005668 | 0.604121  |
| 14 | N  | -2.571465 | -2.571464 | 1.849926  |
| 15 | C  | 1.614521  | 1.614522  | 1.649932  |
| 16 | N  | 1.397273  | 1.397274  | 0.333428  |
| 17 | C  | 2.252771  | 2.252771  | -0.354499 |
| 18 | C  | 3.005667  | 3.005668  | 0.604121  |
| 19 | N  | 2.571464  | 2.571465  | 1.849926  |
| 20 | N  | 0.000000  | 0.000000  | -1.919619 |
| 21 | C  | 0.839132  | -0.839132 | -2.600432 |
| 22 | C  | 0.861769  | -0.861769 | -4.009172 |
| 23 | H  | 1.537499  | -1.537500 | -4.550690 |
| 24 | C  | -0.000001 | 0.000000  | -4.712597 |
| 25 | H  | -0.000001 | -0.000001 | -5.811214 |
| 26 | C  | -0.861770 | 0.861769  | -4.009172 |
| 27 | C  | -0.839132 | 0.839132  | -2.600432 |
| 28 | C  | 1.614521  | -1.614521 | -1.649932 |
| 29 | N  | 1.397274  | -1.397274 | -0.333428 |
| 30 | C  | 2.252771  | -2.252771 | 0.354499  |
| 31 | C  | 3.005668  | -3.005667 | -0.604121 |
| 32 | N  | 2.571465  | -2.571465 | -1.849926 |
| 33 | C  | -1.614521 | 1.614521  | -1.649932 |
| 34 | N  | -1.397273 | 1.397273  | -0.333428 |
| 35 | C  | -2.252770 | 2.252771  | 0.354499  |
| 36 | C  | -3.005667 | 3.005667  | -0.604121 |
| 37 | N  | -2.571465 | 2.571464  | -1.849926 |
| 38 | H  | -1.537500 | -1.537500 | 4.550689  |
| 39 | H  | -1.537500 | 1.537499  | -4.550689 |
| 40 | H  | 4.534906  | 4.534906  | 0.976778  |

|    |   |           |           |           |
|----|---|-----------|-----------|-----------|
| 41 | C | 3.964481  | 3.964481  | 0.231052  |
| 42 | C | 2.466689  | 2.466689  | -1.735092 |
| 43 | H | 1.906062  | 1.906062  | -2.491861 |
| 44 | H | 4.896745  | 4.896745  | -1.480816 |
| 45 | C | 4.157605  | 4.157605  | -1.141329 |
| 46 | C | 3.420091  | 3.420090  | -2.106837 |
| 47 | H | 3.607186  | 3.607185  | -3.173622 |
| 48 | H | -1.906062 | -1.906062 | -2.491861 |
| 49 | C | -2.466689 | -2.466689 | -1.735093 |
| 50 | C | -3.964481 | -3.964481 | 0.231052  |
| 51 | H | -4.534907 | -4.534906 | 0.976777  |
| 52 | C | -4.157605 | -4.157605 | -1.141329 |
| 53 | H | -4.896745 | -4.896745 | -1.480817 |
| 54 | H | -3.607186 | -3.607186 | -3.173622 |
| 55 | C | -3.420090 | -3.420090 | -2.106838 |
| 56 | H | -2.908887 | -2.908887 | 2.751506  |
| 57 | H | 2.908886  | 2.908887  | 2.751507  |
| 58 | H | 2.908887  | -2.908887 | -2.751506 |
| 59 | H | -2.908887 | 2.908886  | -2.751506 |
| 60 | C | 3.964481  | -3.964481 | -0.231052 |
| 61 | H | 4.534906  | -4.534906 | -0.976777 |
| 62 | C | 2.466689  | -2.466688 | 1.735092  |
| 63 | H | 1.906062  | -1.906061 | 2.491861  |
| 64 | H | 4.896745  | -4.896745 | 1.480816  |
| 65 | C | 4.157605  | -4.157605 | 1.141329  |
| 66 | H | 3.607186  | -3.607185 | 3.173622  |
| 67 | C | 3.420091  | -3.420090 | 2.106838  |
| 68 | C | -3.964481 | 3.964480  | -0.231052 |
| 69 | H | -4.534906 | 4.534906  | -0.976777 |
| 70 | C | -2.466688 | 2.466689  | 1.735092  |
| 71 | H | -1.906061 | 1.906062  | 2.491861  |
| 72 | H | -3.607185 | 3.607186  | 3.173622  |
| 73 | C | -3.420090 | 3.420090  | 2.106838  |
| 74 | H | -4.896745 | 4.896745  | 1.480816  |
| 75 | C | -4.157604 | 4.157605  | 1.141329  |

[Fe(2-bip)<sub>2</sub>]<sup>2+</sup>, high-spin.

|    |    |           |           |           |
|----|----|-----------|-----------|-----------|
| 1  | Fe | -0.007329 | 0.002544  | 0.022586  |
| 2  | N  | 0.029983  | 2.157219  | -0.211137 |
| 3  | C  | 1.098459  | 2.759233  | -0.770083 |
| 4  | C  | 1.177714  | 4.152391  | -0.938189 |
| 5  | C  | 0.084012  | 4.917463  | -0.496498 |
| 6  | H  | 0.105532  | 6.010435  | -0.608708 |
| 7  | C  | -1.037685 | 4.301201  | 0.085302  |
| 8  | H  | -1.890264 | 4.899516  | 0.427208  |
| 9  | C  | -1.013911 | 2.901029  | 0.204686  |
| 10 | N  | 2.106529  | 1.850380  | -1.166360 |
| 11 | N  | 1.884972  | 0.512386  | -0.957547 |
| 12 | C  | 2.995739  | -0.108846 | -1.440601 |
| 13 | C  | 3.937811  | 0.863929  | -1.959182 |
| 14 | C  | 3.315766  | 2.104597  | -1.761267 |
| 15 | H  | 3.643619  | 3.120164  | -1.999726 |
| 16 | N  | -2.060535 | 2.131571  | 0.764044  |
| 17 | N  | -1.892790 | 0.771487  | 0.839027  |
| 18 | C  | -3.040281 | 0.305244  | 1.403784  |



|    |   |           |           |           |
|----|---|-----------|-----------|-----------|
| 19 | C | -3.950268 | 1.398704  | 1.684064  |
| 20 | C | -3.270825 | 2.547851  | 1.256562  |
| 21 | H | -3.561796 | 3.601860  | 1.268745  |
| 22 | N | -0.066202 | -2.145708 | 0.270501  |
| 23 | C | -0.549537 | -2.931264 | -0.712694 |
| 24 | C | -0.639867 | -4.328043 | -0.586859 |
| 25 | H | -1.034302 | -4.960386 | -1.390871 |
| 26 | C | -0.204228 | -4.895827 | 0.622956  |
| 27 | H | -0.260218 | -5.984400 | 0.762772  |
| 28 | C | 0.302059  | -4.088267 | 1.656036  |
| 29 | C | 0.352401  | -2.703037 | 1.424593  |
| 30 | N | -0.944486 | -2.208574 | -1.861557 |
| 31 | N | -0.802596 | -0.843392 | -1.844817 |
| 32 | C | -1.248131 | -0.427678 | -3.061996 |
| 33 | C | -1.684436 | -1.559090 | -3.857375 |
| 34 | C | -1.465407 | -2.676653 | -3.040693 |
| 35 | H | -1.639512 | -3.741683 | -3.217296 |
| 36 | N | 0.836268  | -1.757658 | 2.358236  |
| 37 | N | 0.796873  | -0.430135 | 2.011109  |
| 38 | C | 1.331268  | 0.229424  | 3.075250  |
| 39 | C | 1.717058  | -0.707602 | 4.112305  |
| 40 | C | 1.374699  | -1.967488 | 3.601678  |
| 41 | H | 1.480278  | -2.968784 | 4.028487  |
| 42 | H | 2.050852  | 4.634425  | -1.393569 |
| 43 | H | 0.640453  | -4.533293 | 2.599191  |
| 44 | C | 3.292493  | -1.498258 | -1.489619 |
| 45 | H | 2.584555  | -2.242803 | -1.104339 |
| 46 | C | 4.509051  | -1.873014 | -2.047641 |
| 47 | H | 4.768776  | -2.940127 | -2.103356 |
| 48 | C | 5.446509  | -0.914127 | -2.557924 |
| 49 | H | 6.392790  | -1.274489 | -2.984911 |
| 50 | C | 5.181216  | 0.446149  | -2.521785 |
| 51 | H | 5.899704  | 1.180403  | -2.911003 |
| 52 | C | -3.401751 | -1.032480 | 1.720565  |
| 53 | H | -2.720471 | -1.867097 | 1.512796  |
| 54 | C | -4.648472 | -1.238951 | 2.299860  |
| 55 | H | -4.958615 | -2.262023 | 2.557531  |
| 56 | C | -5.553403 | -0.160376 | 2.575936  |
| 57 | H | -6.525683 | -0.389109 | 3.034203  |
| 58 | C | -5.224688 | 1.152887  | 2.277568  |
| 59 | H | -5.917686 | 1.978603  | 2.489310  |
| 60 | C | 1.532663  | 1.625329  | 3.253472  |
| 61 | H | 1.245776  | 2.343425  | 2.474801  |
| 62 | C | 2.108797  | 2.041003  | 4.448282  |
| 63 | H | 2.279193  | 3.114080  | 4.618056  |
| 64 | C | 2.494126  | 1.117370  | 5.476497  |
| 65 | H | 2.945919  | 1.509546  | 6.398272  |
| 66 | C | 2.307663  | -0.248298 | 5.327549  |
| 67 | H | 2.603675  | -0.956103 | 6.113803  |
| 68 | C | -1.318642 | 0.892099  | -3.586438 |
| 69 | H | -0.989281 | 1.755433  | -2.994315 |
| 70 | C | -1.819718 | 1.042671  | -4.874289 |
| 71 | H | -1.887578 | 2.049869  | -5.310524 |
| 72 | C | -2.255277 | -0.073807 | -5.663493 |
| 73 | H | -2.642315 | 0.111785  | -6.675129 |
| 74 | C | -2.196247 | -1.370145 | -5.175965 |

|    |   |           |           |           |
|----|---|-----------|-----------|-----------|
| 75 | H | -2.530819 | -2.224693 | -5.779866 |
|----|---|-----------|-----------|-----------|

[Fe(2-bip)<sub>2</sub>]<sup>2+</sup>, low-spin.

|    |    |           |           |           |
|----|----|-----------|-----------|-----------|
| 1  | Fe | -0.002291 | 0.001703  | 0.000649  |
| 2  | N  | 0.037213  | 1.890346  | -0.210819 |
| 3  | C  | 1.123407  | 2.486633  | -0.761942 |
| 4  | C  | 1.196599  | 3.876177  | -0.940949 |
| 5  | C  | 0.090421  | 4.643139  | -0.527939 |
| 6  | H  | 0.111233  | 5.734435  | -0.653815 |
| 7  | C  | -1.043085 | 4.032411  | 0.041764  |
| 8  | H  | -1.906183 | 4.629300  | 0.360117  |
| 9  | C  | -1.024150 | 2.636587  | 0.183033  |
| 10 | N  | 2.102796  | 1.542598  | -1.103126 |
| 11 | N  | 1.799683  | 0.219777  | -0.834741 |
| 12 | C  | 2.889401  | -0.485363 | -1.249586 |
| 13 | C  | 3.893050  | 0.418046  | -1.785976 |
| 14 | C  | 3.340774  | 1.700024  | -1.669172 |
| 15 | H  | 3.730134  | 2.685169  | -1.941535 |
| 16 | N  | -2.038686 | 1.832195  | 0.720727  |
| 17 | N  | -1.789382 | 0.471210  | 0.758828  |
| 18 | C  | -2.904034 | -0.077704 | 1.319062  |
| 19 | C  | -3.867935 | 0.963113  | 1.632955  |
| 20 | C  | -3.266366 | 2.162307  | 1.231685  |
| 21 | H  | -3.615488 | 3.197970  | 1.274136  |
| 22 | N  | -0.045561 | -1.884701 | 0.215085  |
| 23 | C  | -0.548635 | -2.666035 | -0.772561 |
| 24 | C  | -0.608314 | -4.063031 | -0.657009 |
| 25 | H  | -1.017701 | -4.688539 | -1.459374 |
| 26 | C  | -0.121073 | -4.637954 | 0.532020  |
| 27 | H  | -0.151618 | -5.729082 | 0.657542  |
| 28 | C  | 0.404716  | -3.835868 | 1.562278  |
| 29 | C  | 0.421812  | -2.448066 | 1.357097  |
| 30 | N  | -0.973157 | -1.894889 | -1.863256 |
| 31 | N  | -0.813432 | -0.524414 | -1.748195 |
| 32 | C  | -1.284027 | -0.013761 | -2.921406 |
| 33 | C  | -1.746970 | -1.089032 | -3.782158 |
| 34 | C  | -1.526878 | -2.267552 | -3.059414 |
| 35 | H  | -1.719368 | -3.315618 | -3.305952 |
| 36 | N  | 0.895679  | -1.474149 | 2.246865  |
| 37 | N  | 0.799974  | -0.159336 | 1.825548  |
| 38 | C  | 1.308350  | 0.580054  | 2.851277  |
| 39 | C  | 1.732720  | -0.293635 | 3.932110  |
| 40 | C  | 1.445943  | -1.593202 | 3.495766  |
| 41 | H  | 1.590142  | -2.566371 | 3.973690  |
| 42 | H  | 2.079071  | 4.351013  | -1.386532 |
| 43 | H  | 0.784724  | -4.283445 | 2.488608  |
| 44 | C  | 3.131018  | -1.887428 | -1.219035 |
| 45 | H  | 2.387583  | -2.588792 | -0.823459 |
| 46 | C  | 4.347396  | -2.342335 | -1.712957 |
| 47 | H  | 4.559992  | -3.421112 | -1.701498 |
| 48 | C  | 5.341798  | -1.453692 | -2.241370 |
| 49 | H  | 6.284500  | -1.875052 | -2.617292 |
| 50 | C  | 5.132322  | -0.085160 | -2.285504 |
| 51 | H  | 5.891004  | 0.598193  | -2.691022 |
| 52 | C  | -3.203685 | -1.438832 | 1.606774  |

|    |   |           |           |           |
|----|---|-----------|-----------|-----------|
| 53 | H | -2.494565 | -2.242453 | 1.378925  |
| 54 | C | -4.433718 | -1.718809 | 2.189392  |
| 55 | H | -4.690076 | -2.762417 | 2.422466  |
| 56 | C | -5.388139 | -0.693931 | 2.499553  |
| 57 | H | -6.344234 | -0.980435 | 2.959198  |
| 58 | C | -5.123439 | 0.638661  | 2.230361  |
| 59 | H | -5.850962 | 1.427206  | 2.466791  |
| 60 | C | 1.456707  | 1.990295  | 2.972175  |
| 61 | H | 1.143092  | 2.669842  | 2.171770  |
| 62 | C | 2.014891  | 2.481455  | 4.145966  |
| 63 | H | 2.140230  | 3.567345  | 4.265507  |
| 64 | C | 2.436982  | 1.621838  | 5.214127  |
| 65 | H | 2.872016  | 2.071537  | 6.117474  |
| 66 | C | 2.303902  | 0.246073  | 5.123852  |
| 67 | H | 2.624904  | -0.415746 | 5.939899  |
| 68 | C | -1.366065 | 1.337434  | -3.361108 |
| 69 | H | -1.025162 | 2.166489  | -2.730934 |
| 70 | C | -1.897715 | 1.573426  | -4.623122 |
| 71 | H | -1.972836 | 2.608421  | -4.986907 |
| 72 | C | -2.354571 | 0.513942  | -5.475503 |
| 73 | H | -2.763929 | 0.766186  | -6.463545 |
| 74 | C | -2.287371 | -0.809760 | -5.073536 |
| 75 | H | -2.635376 | -1.624851 | -5.722824 |

---

## References

1. K. Li, J.-L. Niu, M.-Z. Yang, Z. Li, L.-Y. Wu, X.-Q. Hao and M.-P. Song, *Organometallics*, 2015, **34**, 1170–1176.
2. E. Largy, F. Hamon, F. Rosu, V. Gabelica, E. De Pauw, A. Guédin, J.-L. Mergny and M.-P. Teulade-Fichou, *Chem. – Eur. J.*, 2011, **17**, 13274–13283.
3. G. M. Sheldrick, *Acta Cryst. Sect. A: Found. Adv.*, 2015, **71**, 3–8.
4. G. M. Sheldrick, *Acta Cryst. Sect. C.: Struct. Chem.*, 2015, **71**, 3–8.
5. L. J. Barbour, *J. Appl. Crystallogr.*, 2020, **53**, 1141–1146.
6. O. V. Dolomanov, L. J. Bourhis, R. J. Gildea, J. A. K. Howard and H. Puschmann, *J. Appl. Crystallogr.*, 2009, **42**, 339–341.
7. A. L. Spek, *Acta Cryst. Sect. C.: Struct. Chem.*, 2015, **71**, 9–18.
8. P. Guionneau, M. Marchivie, G. Bravic, J.-F. Létard and D. Chasseau, *Top. Curr. Chem.*, 2004, **234**, 97–128.
9. I. Capel Berdiell, R. Kulmaczewski and M. A. Halcrow, *Inorg. Chem.*, 2017, **56**, 8817–8828.
10. J. K. McCusker, A. L. Rheingold and D. N. Hendrickson, *Inorg. Chem.*, 1996, **35**, 2100–2112.
11. J. M. Holland, J. A. McAllister, C. A. Kilner, M. Thornton-Pett, A. J. Bridgeman and M. A. Halcrow, *J. Chem. Soc. Dalton Trans.*, 2002, 548–554.
12. a) L. J. Kershaw Cook, F. L. Thorp-Greenwood, T. P. Comyn, O. Cespedes, G. Chastanet and M. A. Halcrow, *Inorg. Chem.*, 2015, **54**, 6319–6330;  
b) I. Capel Berdiell, R. Kulmaczewski, N. Shahid, O. Cespedes and M. A. Halcrow, *Chem. Commun.*, 2021, **57**, 6566–6569;  
c) N. Suryadevara, A. Mizuno L. Spieker S. Salamon, S. Slezione, A. Maas, E. Pollmann, B. Heinrich, M. Schleberger, H. Wende, S. K. Kuppusamy and M. Ruben, *Chem. – Eur. J.*, 2022, **28**, e202103853;  
d) R. Kulmaczewski, L. J. Kershaw Cook, C. M. Pask, O. Cespedes and M. A. Halcrow, *Cryst. Growth Des.*, 2022, **22**, 1960–1971.
13. S. Vela, J. J. Novoa and J. Ribas-Arino, *Phys. Chem. Chem. Phys.*, 2014, **16**, 27012–27024.
14. M. A. Halcrow, *Coord. Chem. Rev.*, 2009, **253**, 2493–2514.
15. L. J. Kershaw Cook, R. Mohammed, G. Sherborne, T. D. Roberts, S. Alvarez and M. A. Halcrow, *Coord. Chem. Rev.*, 2015, **289–290**, 2–12.
16. G. A. Craig, O. Roubeau and G. Aromí, *Coord. Chem. Rev.*, 2014, **269**, 13–31.
17. P. J. van Koningsbruggen, J. G. Haasnoot, R. A. G. de Graaff and J. Reedijk, *J. Chem. Soc. Dalton Trans.*, 1993, 483–484.
18. A. J. Gordon and R. A. Ford, *The Chemists Companion – A Handbook of Practical Data, Techniques and References*, John Wiley, Chichester, 1972, p. 109.
19. R. Pritchard, C. A. Kilner and M. A. Halcrow, *Chem. Commun.*, 2007, 577–579.
20. A. Santoro, L. J. Kershaw Cook, R. Kulmaczewski, S. A. Barrett, O. Cespedes and M. A. Halcrow, *Inorg. Chem.*, 2015, **54**, 682–693.
21. C. R. Martinez and B. L. Iverson, *Chem. Sci.*, 2012, **3**, 2191–2201.
22. C. M. Harris, H. R. H. Patil and E. Sinn, *Inorg. Chem.*, 1969, **8**, 101–104.
23. a) D. M. Klassen, C. W. Hudson and E. L. Shaddix, *Inorg. Chem.* 1975, **14**, 2733–2736;  
b) M. L. Stone and G. A. Crosby, *Chem. Phys. Lett.*, 1981, **79**, 169–173;  
c) S. Aroua, T. K. Todorova, P. Hommes, L.-M. Chamoreau, H.-U. Reissig, V. Mougél and M. Fontecave, *Inorg. Chem.*, 2017, **56**, 5930–5940.
24. N. Shahid, K. E. Burrows, C. M. Pask, O. Cespedes, M. J. Howard, P. C. McGowan and M. A. Halcrow, *Dalton Trans.*, 2022, **51**, 4262–4274.

25. R. Boča, P. Baran, L. Dlháň, H. Fuess, W. Haase, F. Renz, W. Linert, I. Svoboda and R. Werner, *Inorg. Chim. Acta*, 1997, **260**, 129–136.
26. a) J. Catalan, J. L. M. Abboud and J. Elguero, *Adv. Heterocycl. Chem.*, 1987, **41**, 187–274;  
b) A. C. Humphries, E. Gancia, M. T. Gilligan, S. Goodacre, D. Hallett, K. J. Merchant and S. R. Thomas, *Bioorg. Med. Chem. Lett.*, 2006, **16**, 1518–1522.
